# Supplementary material
Source: MDPI journal article supplement (https://www.mdpi.com/1099-4300/19/12/686)
Supplement: s1 [file s1]

# Do we really need to catch them all? A new User-guided Social Media Crawling method

Fredrik Erlandsson<sup>1,\*</sup>, Martin Boldt<sup>1,+</sup>, Piotr Bródka<sup>2,+</sup>, and Henric Johnson<sup>1</sup>

<sup>1</sup>Blekinge Institute of Technology, Department of Computer Science and Engineering, Sweden

<sup>2</sup>Wrocław University of Science and Technology, Department of Computational Intelligence, Poland

\*fredrik.erlandsson@bth.se

+these authors contributed equally to this work

## ABSTRACT

With the growing use of popular social media services like Facebook and Twitter it is hard to collect all content from the networks without access to the core infrastructure or paying for it. Thus, if all content cannot be collected one must consider which data are of most importance. In this work we present a novel User-guided Social Media Crawling method (*USMC*) that is able to collect data from social media, utilizing the wisdom of the crowd to decide the order in which user generated content should be collected, to cover as many user interactions as possible. *USMC* is validated by crawling 160 Facebook public pages, containing 368 million users and 1.3 billion interactions, and it is compared with two other crawling methods. The results show that it is possible to cover approximately 75% of the interactions on a Facebook page by sampling just 20 % of its posts, and at the same time reduce the crawling time by 53%. What is more, the social network constructed from the 20% sample has more than 75% of the users and edges compared to the social network created from all posts, and has very similar degree distribution.

## Supplementary Information

**S1 Table.** Detailed data used to construct Fig. 3, including the standard deviation for both Interactions and Crawling time. Please note that all data are normalized.

| Type                      | Size  | Interactions | (std) | Time  | (std) |
|---------------------------|-------|--------------|-------|-------|-------|
| USMC - Number of likes    | 0.050 | 0.507        | 0.266 | 0.257 | 0.200 |
| USMC - Number of comments | 0.050 | 0.401        | 0.269 | 0.250 | 0.201 |
| USMC - Post life time     | 0.050 | 0.254        | 0.279 | 0.149 | 0.166 |
| Chronological             | 0.050 | 0.143        | 0.141 | 0.112 | 0.147 |
| Random                    | 0.050 | 0.049        | 0.022 | 0.049 | 0.034 |
| USMC - Number of likes    | 0.100 | 0.621        | 0.247 | 0.350 | 0.219 |
| USMC - Number of comments | 0.100 | 0.510        | 0.268 | 0.339 | 0.224 |
| USMC - Post life time     | 0.100 | 0.362        | 0.290 | 0.232 | 0.196 |
| Chronological             | 0.100 | 0.240        | 0.176 | 0.202 | 0.211 |
| Random                    | 0.100 | 0.101        | 0.034 | 0.101 | 0.050 |
| USMC - Number of likes    | 0.200 | 0.745        | 0.200 | 0.467 | 0.227 |
| USMC - Number of comments | 0.200 | 0.627        | 0.248 | 0.455 | 0.234 |
| USMC - Post life time     | 0.200 | 0.524        | 0.273 | 0.361 | 0.202 |
| Chronological             | 0.200 | 0.402        | 0.205 | 0.338 | 0.238 |
| Random                    | 0.200 | 0.200        | 0.046 | 0.200 | 0.068 |
| USMC - Number of likes    | 0.400 | 0.867        | 0.125 | 0.647 | 0.202 |
| USMC - Number of comments | 0.400 | 0.785        | 0.167 | 0.630 | 0.194 |
| USMC - Post life time     | 0.400 | 0.718        | 0.201 | 0.566 | 0.177 |
| Chronological             | 0.400 | 0.624        | 0.190 | 0.546 | 0.231 |
| Random                    | 0.400 | 0.400        | 0.054 | 0.400 | 0.082 |
| USMC - Number of likes    | 0.600 | 0.945        | 0.063 | 0.792 | 0.146 |
| USMC - Number of comments | 0.600 | 0.892        | 0.105 | 0.771 | 0.155 |
| USMC - Post life time     | 0.600 | 0.860        | 0.131 | 0.741 | 0.141 |
| Chronological             | 0.600 | 0.787        | 0.147 | 0.716 | 0.187 |
| Random                    | 0.600 | 0.600        | 0.054 | 0.599 | 0.082 |
| USMC - Number of likes    | 0.800 | 0.982        | 0.026 | 0.906 | 0.080 |
| USMC - Number of comments | 0.800 | 0.950        | 0.062 | 0.886 | 0.098 |
| USMC - Post life time     | 0.800 | 0.944        | 0.058 | 0.877 | 0.091 |
| Chronological             | 0.800 | 0.905        | 0.102 | 0.868 | 0.119 |
| Random                    | 0.800 | 0.801        | 0.043 | 0.801 | 0.064 |
| USMC - Number of likes    | 0.900 | 0.992        | 0.015 | 0.953 | 0.048 |
| USMC - Number of comments | 0.900 | 0.975        | 0.037 | 0.944 | 0.048 |
| USMC - Post life time     | 0.900 | 0.973        | 0.033 | 0.940 | 0.053 |
| Chronological             | 0.900 | 0.957        | 0.064 | 0.939 | 0.068 |
| Random                    | 0.900 | 0.899        | 0.035 | 0.899 | 0.055 |
| USMC - Number of likes    | 0.950 | 0.996        | 0.011 | 0.975 | 0.034 |
| USMC - Number of comments | 0.950 | 0.987        | 0.020 | 0.972 | 0.027 |
| USMC - Post life time     | 0.950 | 0.987        | 0.018 | 0.970 | 0.036 |
| Chronological             | 0.950 | 0.977        | 0.053 | 0.970 | 0.042 |
| Random                    | 0.950 | 0.950        | 0.024 | 0.950 | 0.033 |

**S2 Table.** Facebook pages statistics. If page does not have a name it means that the name is not in Latin characters set or does not exist anymore.

| Name                                             | Page id         | Posts  | Users   | Comments | Likes     | Edges   | Nodes  |
|--------------------------------------------------|-----------------|--------|---------|----------|-----------|---------|--------|
| Royal Club Consulting                            | 203841476411447 | 562    | 182     | 38       | 1,300     | 3       | 25     |
| Sustainable Development Policy & Practice / P... | 126385310775420 | 1,756  | 273     | 37       | 384       | 4       | 27     |
| Ski-Akademie Schladming                          | 266340220123141 | 254    | 949     | 64       | 1,773     | 12      | 44     |
| Say NO to Bullying                               | 246881265345291 | 372    | 469     | 129      | 791       | 34      | 46     |
| Chaddsford Winery                                | 493075535051    | 207    | 480     | 160      | 814       | 101     | 96     |
| 488878434469215                                  | 488878434469215 | 578    | 1,889   | 224      | 4,872     | 107     | 140    |
| Posthotel Schladming                             | 184073274591    | 156    | 600     | 162      | 1,806     | 138     | 74     |
| 24-Hour Bully Stake-Out                          | 150499681635588 | 1,218  | 750     | 1,008    | 1,485     | 344     | 264    |
| Dourakis Winery                                  | 106096217726    | 281    | 3,048   | 400      | 7,042     | 360     | 183    |
| Energy Saver                                     | 121219973056    | 704    | 2,909   | 644      | 6,397     | 381     | 448    |
| Play Station, Nitendo, X Boxs E.t.c              | 10237302714     | 605    | 390     | 143      | 385       | 403     | 120    |
| Betty Boom                                       | 9564135890      | 493    | 657     | 648      | 3,365     | 658     | 167    |
| Charlie's Sub Sandwich Station                   | 268228483234    | 1,126  | 1,555   | 1,118    | 3,685     | 704     | 482    |
| THE nightrace Schladming official site           | 220818858019    | 256    | 3,085   | 628      | 4,932     | 945     | 410    |
| Keep Matt Free                                   | 192646367542354 | 140    | 3,634   | 402      | 5,435     | 1,767   | 279    |
| Tiger                                            | 11132188727     | 1,163  | 1,579   | 499      | 2,161     | 2,251   | 325    |
| WINERY                                           | 146839468660306 | 749    | 4,659   | 1,063    | 15,979    | 2,320   | 491    |
| Cancer Research UK Relay For Life                | 6700961047      | 667    | 1,328   | 881      | 3,258     | 2,631   | 387    |
| Sharrott Winery                                  | 15554410418     | 1,013  | 1,585   | 1,463    | 6,880     | 2,851   | 425    |
| Drink Air                                        | 310752782271834 | 642    | 2,271   | 1,417    | 5,771     | 3,018   | 636    |
| Mutt Lynch Winery                                | 161976601328    | 614    | 3,170   | 1,227    | 7,018     | 3,242   | 626    |
| NEWS24                                           | 282571518441363 | 2,228  | 26,868  | 3,459    | 138,183   | 3,975   | 1,710  |
| Festiwal Polskich Filmów Fabularnych             | 251797246747    | 688    | 5,207   | 2,443    | 14,210    | 5,040   | 901    |
| Stop It Now!                                     | 16871848717     | 1,152  | 1,286   | 1,276    | 3,565     | 5,113   | 389    |
| ATOMIC SKIING                                    | 132728146765723 | 1,445  | 22,089  | 1,946    | 58,695    | 5,545   | 1,279  |
| PLAY STATION 2                                   | 18651374805     | 2,900  | 1,877   | 1,302    | 1,671     | 5,619   | 913    |
| Caring and Courageous                            | 178435075560368 | 4,523  | 13,182  | 4,577    | 55,642    | 5,805   | 1,192  |
| Rumah Madani - Busana Muslim                     | 111452573760    | 9,391  | 18,291  | 18,571   | 19,623    | 9,494   | 3,500  |
| Farmville Bonus                                  | 130833830320642 | 638    | 16,052  | 2,775    | 33,285    | 10,230  | 2,203  |
| Occupy Wall Street                               | 258106877558909 | 7,584  | 14,227  | 6,600    | 23,867    | 18,254  | 3,032  |
| Friends of NRA                                   | 261098770903    | 1,742  | 68,063  | 4,588    | 112,618   | 18,960  | 3,301  |
| Drew Curtis' Fark.com                            | 42145905998     | 2,763  | 13,603  | 5,775    | 22,681    | 24,740  | 3,506  |
| 15755709838                                      | 15755709838     | 1,075  | 23,161  | 5,981    | 92,914    | 34,855  | 3,247  |
| Chateau Elan Winery & Resort                     | 19286773617     | 1,131  | 25,008  | 4,814    | 41,928    | 36,065  | 3,950  |
| Bicky Burger                                     | 9727196242      | 623    | 1,908   | 2,579    | 1,920     | 37,888  | 636    |
| Hold My Hand                                     | 157264947680409 | 8,275  | 45,548  | 35,242   | 226,703   | 57,844  | 7,378  |
| Oceana                                           | 6334782252      | 2,153  | 78,971  | 6,969    | 180,096   | 63,346  | 4,488  |
| Orange                                           | 7558451780      | 14,736 | 31,107  | 26,559   | 44,124    | 73,516  | 9,518  |
| One Year Bible Blog                              | 30775112500     | 4,409  | 50,652  | 16,744   | 339,679   | 76,305  | 5,729  |
| Pureology Serious Colour Care                    | 16792472126     | 3,326  | 15,936  | 8,428    | 31,866    | 82,857  | 4,924  |
| Rainforest Action Network                        | 8002590959      | 5,185  | 118,060 | 16,067   | 249,414   | 83,752  | 8,816  |
| Intel Malaysia                                   | 144511635581827 | 3,408  | 123,276 | 12,407   | 207,804   | 102,349 | 6,868  |
| Remove and Replace Every Teapublican in 2012     | 152358668171541 | 3,627  | 25,755  | 9,773    | 91,126    | 103,286 | 4,971  |
| AMBER Alert                                      | 226402156107    | 3,160  | 90,175  | 8,751    | 143,833   | 108,954 | 6,075  |
| Pakistan Air Force                               | 169629069729559 | 2,516  | 75,821  | 18,155   | 201,082   | 150,473 | 11,126 |
| Smilebox                                         | 6289201895      | 6,194  | 48,109  | 11,578   | 74,251    | 157,524 | 7,095  |
| Intel Australia                                  | 145393495515570 | 1,144  | 46,891  | 11,222   | 63,045    | 159,249 | 8,063  |
| MGM Studios                                      | 18962571991     | 7,461  | 13,356  | 10,548   | 60,500    | 161,193 | 3,252  |
| A Little Inspiration                             | 344267635599110 | 11,919 | 442,244 | 49,308   | 1,751,077 | 180,823 | 30,482 |
| 99%                                              | 295474380481252 | 1,390  | 49,500  | 30,334   | 134,141   | 181,617 | 8,887  |
| 5676133521                                       | 5676133521      | 35,602 | 41,559  | 15,718   | 46,018    | 205,499 | 9,536  |
| Disneynature                                     | 41120927270     | 429    | 67,000  | 10,875   | 129,282   | 229,551 | 7,265  |
| What Would You Do?                               | 10689860898     | 538    | 13,222  | 11,274   | 36,033    | 233,914 | 5,575  |
| kate spade new york                              | 10737653985     | 1,187  | 104,558 | 18,568   | 278,173   | 235,796 | 11,750 |
| I Relate Feelings                                | 166785736790960 | 2,791  | 219,182 | 28,564   | 1,057,158 | 254,768 | 17,995 |
| CNNMoney                                         | 6651543066      | 11,238 | 120,824 | 57,311   | 348,925   | 260,575 | 15,064 |
| Mall of America                                  | 6898166798      | 9,144  | 87,679  | 27,967   | 146,402   | 261,074 | 13,887 |
| HTCampus.com                                     | 174009145975879 | 3,344  | 28,727  | 10,669   | 52,768    | 264,058 | 6,727  |
| Clarins                                          | 98029424570     | 6,118  | 36,072  | 18,895   | 81,851    | 292,926 | 9,416  |
| Intel France                                     | 186901908014467 | 1,607  | 32,898  | 16,398   | 39,914    | 298,323 | 10,143 |
| JAPAN4YOU                                        | 99489209116     | 5,966  | 117,584 | 42,984   | 382,144   | 303,821 | 17,141 |
| Disaster Response on Facebook                    | 250083749935    | 6,414  | 79,809  | 14,234   | 94,800    | 366,692 | 10,739 |
| I Love My Family                                 | 148167278107    | 9,165  | 618,079 | 37,131   | 1,141,265 | 387,171 | 24,332 |
| NDTV Goodtimes                                   | 76026867998     | 5,630  | 355,869 | 35,962   | 832,376   | 393,171 | 23,646 |
| News24 Kenya                                     | 201728286564087 | 6,172  | 53,767  | 31,945   | 52,681    | 397,015 | 23,489 |
| We The People                                    | 178463258907212 | 57,499 | 161,707 | 91,279   | 831,279   | 439,834 | 30,766 |
| Office                                           | 178191330369    | 4,973  | 196,862 | 28,155   | 252,763   | 462,469 | 18,707 |
| 335574863819                                     | 335574863819    | 236    | 71,616  | 13,139   | 118,502   | 476,668 | 9,810  |

Continued on next page

S2 Table. (continued)

| Name                                              | Page id         | Posts   | Users     | Comments  | Likes      | Edges      | Nodes   |
|---------------------------------------------------|-----------------|---------|-----------|-----------|------------|------------|---------|
| Neutrogena                                        | 7717041259      | 7,878   | 98,269    | 33,064    | 161,540    | 518,038    | 18,512  |
| Genevieve Gordier                                 | 174431941806    | 2,473   | 41,105    | 19,784    | 97,135     | 583,291    | 10,175  |
| TurboTax                                          | 7511533723      | 13,322  | 46,976    | 65,687    | 80,095     | 608,739    | 14,050  |
| (RED)                                             | 6829493713      | 9,014   | 928,159   | 44,807    | 1,368,432  | 666,520    | 37,841  |
| Sierra Club                                       | 6204742571      | 3,804   | 134,502   | 21,287    | 488,584    | 703,952    | 12,101  |
| Occupy Seattle                                    | 254620607914006 | 39,616  | 298,041   | 112,906   | 862,086    | 730,694    | 48,446  |
| Nigeria                                           | 7283976105      | 66      | 17,218    | 10,698    | 17,385     | 863,555    | 7,846   |
| Thich Nhat Hanh                                   | 7691064634      | 1,316   | 854,688   | 35,984    | 1,487,600  | 888,384    | 27,649  |
| Liberal Democrats                                 | 5883973269      | 1,306   | 27,725    | 46,378    | 107,284    | 1,035,517  | 11,618  |
| Human Target                                      | 83431257070     | 229     | 19,990    | 15,921    | 49,295     | 1,309,384  | 8,038   |
| ONE                                               | 11055104471     | 10,758  | 553,321   | 55,342    | 1,474,206  | 1,330,108  | 38,716  |
| Diet Coke                                         | 8605796091      | 13,778  | 117,444   | 24,389    | 181,455    | 1,332,970  | 16,178  |
| Lifehacker                                        | 7568536355      | 11,727  | 247,459   | 139,009   | 1,049,963  | 1,638,928  | 51,873  |
| Defenders of Wildlife                             | 5720973755      | 9,660   | 111,035   | 59,268    | 740,886    | 1,742,348  | 21,188  |
| First Bank of Nigeria Limited                     | 218502344846561 | 1,537   | 100,883   | 61,248    | 168,091    | 2,006,432  | 38,655  |
| Sony Music Brasil                                 | 99219862934     | 1,352   | 168,946   | 60,921    | 464,592    | 2,013,773  | 34,346  |
| 125787337496837                                   | 125787337496837 | 10,781  | 39,337    | 84,484    | 420,257    | 2,043,807  | 14,672  |
| Madison Square Garden                             | 28859306498     | 7,208   | 783,949   | 56,885    | 1,129,189  | 2,362,698  | 44,147  |
| MetLife                                           | 164505093569983 | 4,646   | 294,975   | 54,785    | 1,208,807  | 2,388,519  | 29,902  |
| WellDoneStuff.Com                                 | 302896416450257 | 3,546   | 1,325,457 | 117,839   | 3,085,706  | 2,427,758  | 96,841  |
| Hilton HHonors                                    | 120963705931    | 5,843   | 228,520   | 28,670    | 373,519    | 2,500,219  | 19,915  |
| The BULLY Project                                 | 107214895991663 | 13,934  | 393,667   | 64,502    | 858,783    | 2,707,881  | 37,157  |
| Avaaz                                             | 8340223883      | 23,173  | 992,140   | 86,337    | 1,892,211  | 2,750,809  | 61,139  |
| Amazon Books                                      | 150864087963    | 5,523   | 125,512   | 37,304    | 200,124    | 2,898,421  | 25,579  |
| Sigur Rós                                         | 6187954123      | 16,735  | 224,333   | 42,050    | 585,551    | 2,942,991  | 27,348  |
| NBC Politics                                      | 154957517930371 | 5,007   | 76,351    | 43,401    | 148,379    | 2,944,870  | 25,753  |
| Liftoptia                                         | 8114223318      | 3,973   | 47,001    | 50,065    | 158,699    | 3,198,393  | 18,983  |
| Nat Geo Wild                                      | 196008660929    | 1,598   | 4,080,404 | 96,961    | 6,853,487  | 3,325,417  | 82,676  |
| 199299723534097                                   | 199299723534097 | 19,287  | 231,256   | 33,437    | 385,775    | 3,340,919  | 24,590  |
| Human Rights Watch                                | 42940254353     | 49,177  | 676,432   | 116,163   | 1,140,654  | 4,057,011  | 63,191  |
| Royal Air Force                                   | 26035834884     | 14,825  | 518,911   | 124,547   | 2,117,085  | 4,194,305  | 55,807  |
| 141094772576049                                   | 141094772576049 | 7       | 14,708    | 10,123    | 12,877     | 4,502,259  | 5,746   |
| JAPAN AIRLINES (JAL)                              | 195152223850783 | 1,097   | 673,490   | 89,594    | 4,026,970  | 4,545,436  | 46,168  |
| Amazon Student                                    | 135155166518704 | 5,286   | 181,508   | 43,497    | 200,777    | 4,647,731  | 38,497  |
| San Francisco   The Official Guide                | 55139614218     | 13,305  | 735,183   | 116,336   | 2,054,348  | 4,806,264  | 80,978  |
| California Right To Know                          | 178713385549168 | 4,462   | 644,007   | 70,345    | 1,247,518  | 5,128,532  | 50,749  |
| 193072760827                                      | 193072760827    | 10,141  | 534,199   | 66,006    | 2,660,263  | 5,196,490  | 35,186  |
| Sprint                                            | 8389383510      | 121,624 | 402,589   | 421,677   | 569,390    | 5,302,697  | 83,940  |
| Joss Stone                                        | 5630135837      | 19,542  | 253,053   | 64,049    | 797,799    | 5,347,896  | 36,272  |
| *Well, if that isn't the skank calling the who... | 292440510802935 | 8,516   | 532,138   | 132,555   | 2,384,824  | 6,319,615  | 62,416  |
| AirAsia                                           | 18801397386     | 103,808 | 318,869   | 331,450   | 790,496    | 7,622,130  | 92,077  |
| Newsweek                                          | 18343191100     | 15,499  | 743,737   | 187,464   | 1,214,252  | 9,070,226  | 117,362 |
| Epica                                             | 8031842923      | 1,487   | 364,197   | 110,159   | 1,813,942  | 10,855,119 | 57,131  |
| Love                                              | 135922659784530 | 15,197  | 1,088,422 | 190,854   | 5,808,937  | 15,925,918 | 120,750 |
| Ted                                               | 317928348241564 | 23,608  | 309,082   | 81,892    | 506,756    | 16,871,827 | 61,995  |
| fluid ink                                         | 121128974566421 | 1,721   | 443,794   | 51,213    | 544,276    | 19,096,755 | 38,826  |
| humor inteligente                                 | 292974040727244 | 7,252   | 6,368,200 | 520,868   | 15,957,356 | 19,231,726 | 418,409 |
| KFC                                               | 7144906559      | 45,228  | 300,844   | 136,044   | 395,669    | 22,211,434 | 91,923  |
| U.S. Soccer                                       | 32421823940     | 22,984  | 949,625   | 283,819   | 2,569,209  | 22,726,254 | 132,817 |
| HBO                                               | 113408673932    | 32,476  | 2,895,356 | 226,018   | 3,525,002  | 23,898,618 | 188,232 |
| ThinkGeek                                         | 6399067073      | 30,368  | 822,694   | 225,890   | 4,221,585  | 24,058,867 | 108,818 |
| Alanis Morissette                                 | 6002796793      | 616     | 378,711   | 86,702    | 1,164,302  | 24,684,390 | 50,190  |
| Planned Parenthood Action                         | 8934429638      | 22,338  | 706,756   | 300,004   | 3,234,499  | 27,142,303 | 82,602  |
| Royal Pains                                       | 141512340315    | 7,855   | 179,121   | 88,729    | 580,721    | 29,647,131 | 40,745  |
| CBS                                               | 47360808996     | 48,503  | 5,904,875 | 406,287   | 7,607,876  | 31,024,271 | 323,247 |
| No, Microsoft Word, I'm pretty sure I know how... | 104375499654834 | 12,963  | 1,816,142 | 160,176   | 6,801,222  | 32,206,661 | 108,276 |
| True Activist                                     | 129370207168068 | 17,664  | 2,851,690 | 289,156   | 6,947,506  | 43,402,257 | 207,935 |
| CNBC                                              | 97212224368     | 15,440  | 1,432,933 | 440,391   | 2,306,032  | 53,416,686 | 255,087 |
| AT&T                                              | 8576093908      | 231,521 | 1,330,859 | 957,877   | 2,251,109  | 54,860,445 | 238,830 |
| Jennifer Hudson                                   | 7886660434      | 437     | 1,247,861 | 164,138   | 1,971,608  | 59,743,420 | 128,195 |
| The Richard Dawkins Foundation for Reason and ... | 8798180154      | 33,559  | 810,320   | 483,200   | 4,417,444  | 60,627,254 | 130,476 |
| So You Think You Can Dance                        | 9748634303      | 85,185  | 889,270   | 293,600   | 2,580,510  | 61,042,994 | 142,010 |
| Boston Celtics                                    | 8725012666      | 2,148   | 831,423   | 378,473   | 3,737,903  | 62,757,635 | 170,571 |
| The Office                                        | 6092929747      | 65,507  | 2,067,280 | 368,369   | 8,404,195  | 64,391,891 | 207,428 |
| KHUSUS MUSLIMAH                                   | 108919785796003 | 6,726   | 659,541   | 157,370   | 1,484,280  | 71,203,208 | 117,501 |
| Jeep                                              | 7037526514      | 88,571  | 332,389   | 374,401   | 822,363    | 71,275,779 | 137,159 |
| Guns N' Roses                                     | 10901008068     | 1,398   | 922,449   | 374,576   | 2,358,218  | 85,765,225 | 220,459 |
| Thirty Seconds to Mars                            | 5618127822      | 3,298   | 1,768,814 | 411,789   | 12,625,270 | 87,803,406 | 185,361 |
| USA TODAY                                         | 13652355666     | 20,932  | 7,451,142 | 1,097,625 | 13,976,321 | 94,570,053 | 694,618 |

Continued on next page

**S2 Table.** (continued)

| Name                            | Page id         | Posts   | Users       | Comments   | Likes       | Edges         | Nodes     |
|---------------------------------|-----------------|---------|-------------|------------|-------------|---------------|-----------|
| The Wall Street Journal         | 8304333127      | 29,186  | 9,333,492   | 1,636,732  | 20,822,568  | 96,838,683    | 925,938   |
| Kelly Rowland                   | 5485793674      | 46,629  | 1,912,487   | 242,766    | 5,639,775   | 149,022,735   | 155,241   |
| I Love Being Black              | 18493706927     | 5,670   | 3,660,378   | 687,000    | 16,818,408  | 152,389,438   | 358,607   |
| Le Monde.fr                     | 14892757589     | 33,787  | 11,698,482  | 2,486,741  | 34,930,046  | 180,750,060   | 1,181,501 |
| Islamic Book                    | 192169930808550 | 33,784  | 6,946,485   | 1,288,775  | 23,140,984  | 184,572,975   | 792,567   |
| SID                             | 17382788643     | 1,380   | 573,048     | 771,087    | 3,039,529   | 185,595,986   | 204,982   |
| Katy Perry                      | 7126051465      | 470,528 | 2,187,154   | 669,443    | 3,683,168   | 229,310,526   | 411,750   |
| Do Something                    | 7630216751      | 12,451  | 1,340,787   | 381,540    | 2,615,132   | 237,194,443   | 261,412   |
| Mr. Bean                        | 17774451468     | 533     | 3,017,698   | 553,378    | 4,118,601   | 246,789,355   | 367,959   |
| NPR                             | 10643211755     | 13,869  | 4,198,783   | 1,436,847  | 11,264,175  | 264,604,989   | 573,617   |
| The Onion                       | 20950654496     | 15,864  | 8,600,978   | 1,607,803  | 28,288,510  | 277,474,993   | 767,184   |
| PoliticsNation with Al Sharpton | 280920811923248 | 80,829  | 2,742,367   | 2,336,604  | 13,597,984  | 484,549,856   | 668,319   |
| Buffalo Wild Wings              | 9418270899      | 78,156  | 2,357,805   | 902,121    | 6,147,686   | 617,537,397   | 514,143   |
| The New York Times              | 5281959998      | 46,858  | 35,982,349  | 5,329,607  | 87,662,740  | 705,053,685   | 3,020,786 |
| Being Conservative              | 134193140910    | 836     | 1,223,614   | 973,422    | 3,899,235   | 741,039,627   | 423,040   |
| Linkin Park                     | 8210451787      | 275,143 | 2,871,517   | 1,347,061  | 7,170,784   | 744,469,926   | 681,054   |
| LA Lakers                       | 144917055340    | 3,041   | 3,653,065   | 1,682,734  | 29,295,627  | 771,588,768   | 599,813   |
| MLB                             | 5768707450      | 9,439   | 2,946,677   | 2,602,902  | 25,145,970  | 1,088,696,317 | 533,729   |
| Rush Limbaugh                   | 136264019722601 | 3,870   | 9,554,690   | 2,398,526  | 31,336,180  | 1,240,262,427 | 1,414,824 |
| CNN                             | 5550296508      | 466,942 | 8,376,715   | 5,146,195  | 27,090,373  | 1,434,229,849 | 1,458,146 |
| The White House                 | 63811549237     | 6,742   | 32,581,271  | 9,238,522  | 78,841,712  | 4,238,052,189 | 2,385,752 |
| The Tea Party <sup>†</sup>      | 133279166727577 | 55,016  | 77,084,290  | 27,550,352 | 308,495,988 |               |           |
| Barack Obama <sup>†</sup>       | 6815841748      | 4,147   | 113,379,978 | 13,250,519 | 275,134,360 |               |           |

<sup>†</sup> Page too big to generate SNA.

141094772576049

7283976105

192646367542354

184073274591

493075535051

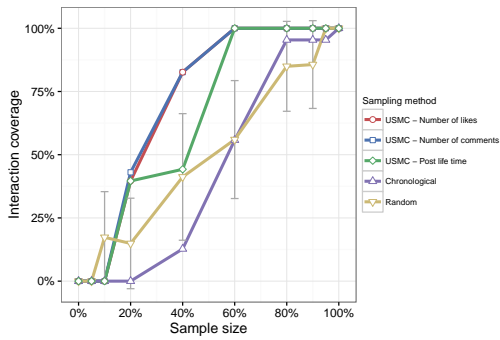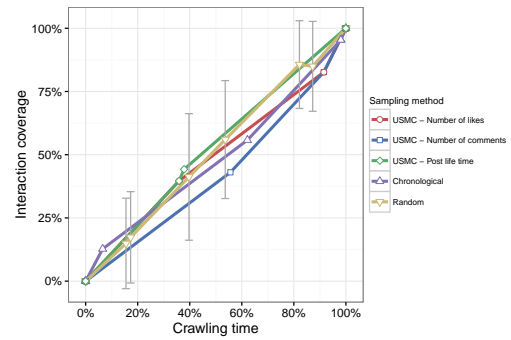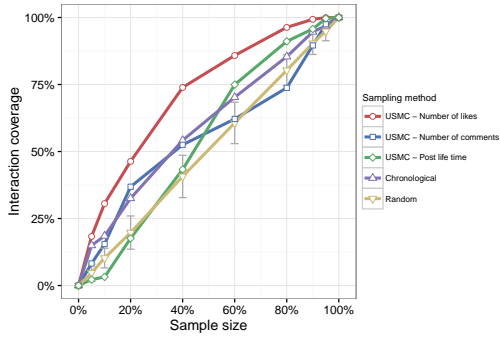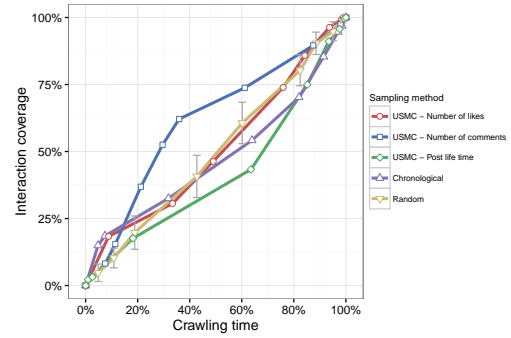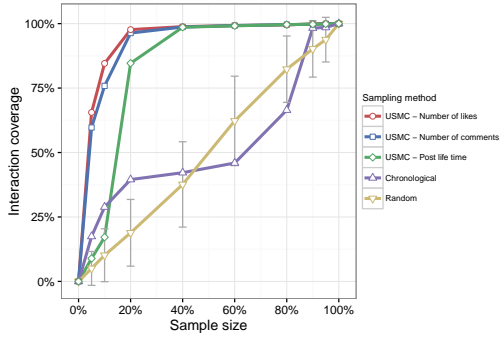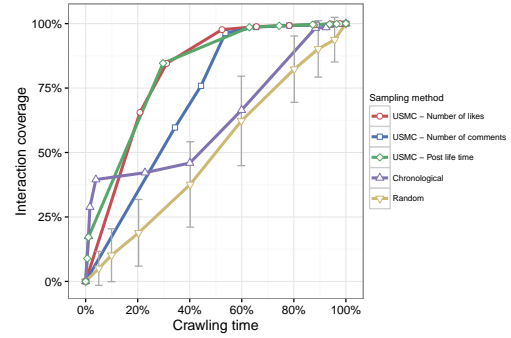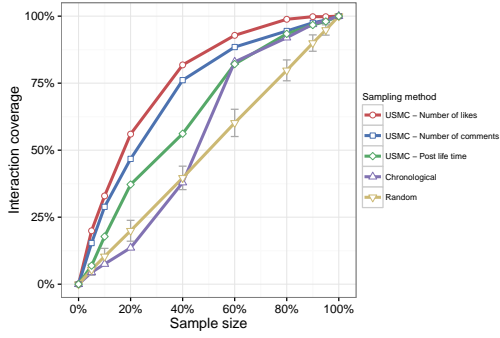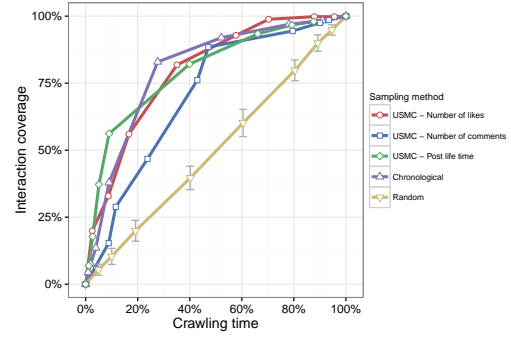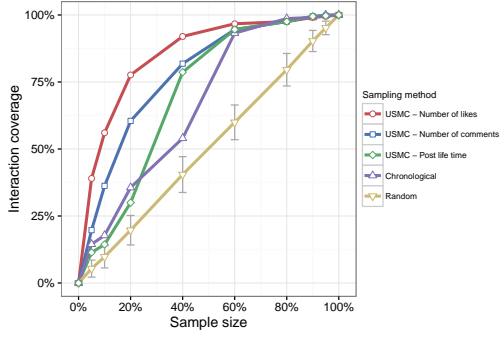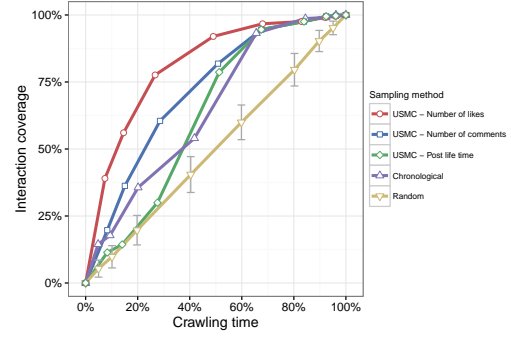

Continued on next page

**S1 Fig.** The effect of ranking with regards to number of interactions of the sample size *left figure* and crawling time *right figure* from a subset of a page's posts ranked by *number of comments*, *number of likes*, *post lifetime* and a *random sample*. The *random sample* shows the median and standard deviation for 100 runs.

83431257070

335574863819

266340220123141

220818858019

106096217726

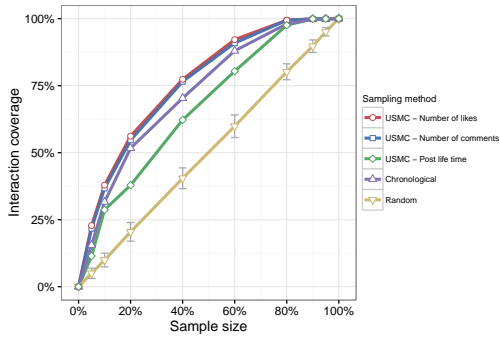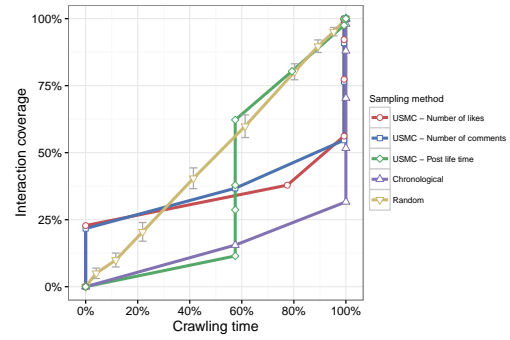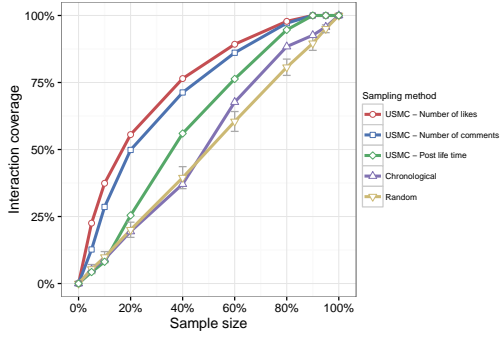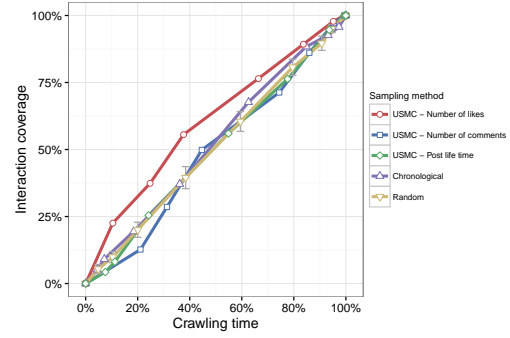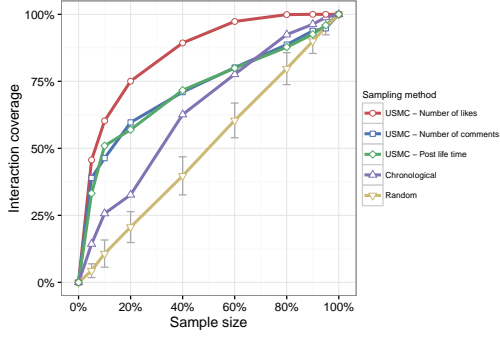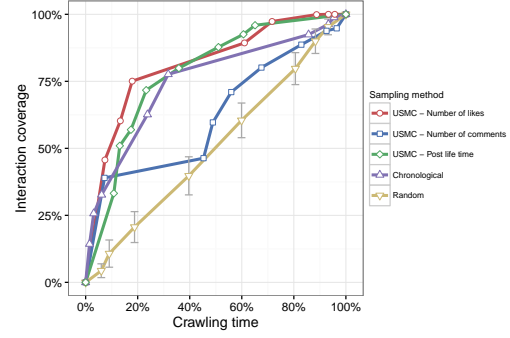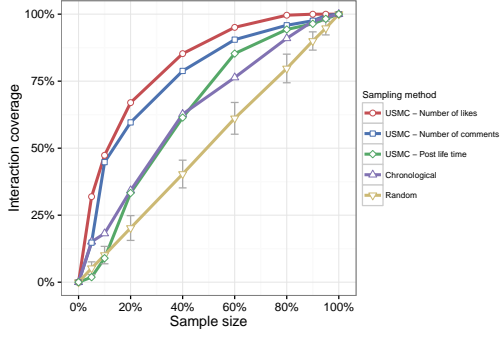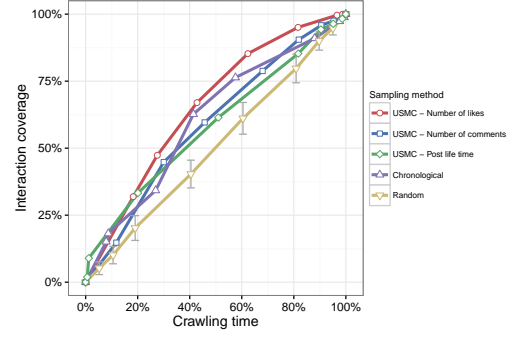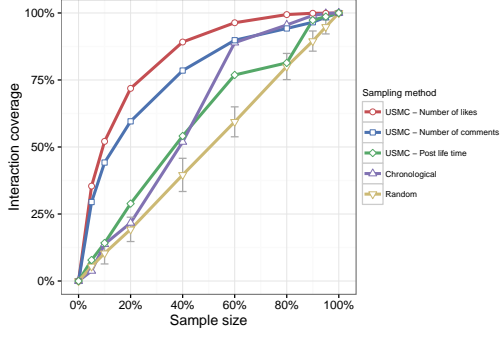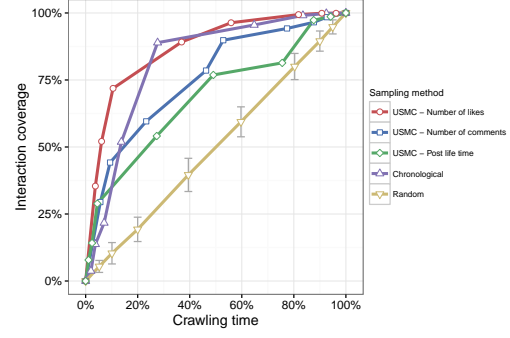

Continued on next page

**S1 Fig.** The effect of ranking with regards to number of interactions of the sample size *left figure* and crawling time *right figure* from a subset of a page’s posts ranked by *number of comments*, *number of likes*, *post lifetime* and a *random sample*. The *random sample* shows the median and standard deviation for 100 runs.

246881265345291

41120927270

7886660434

9564135890

17774451468

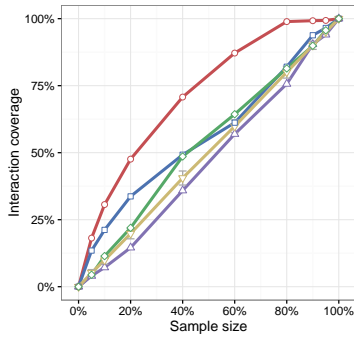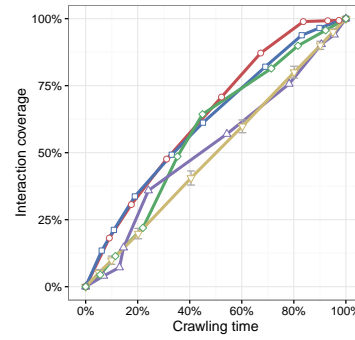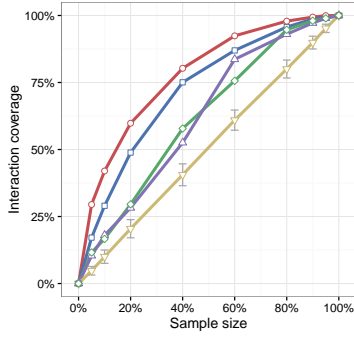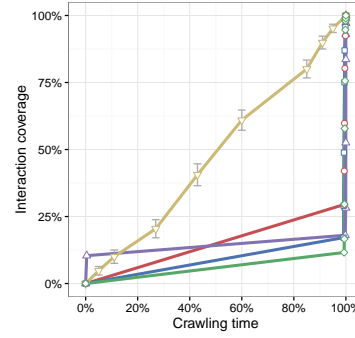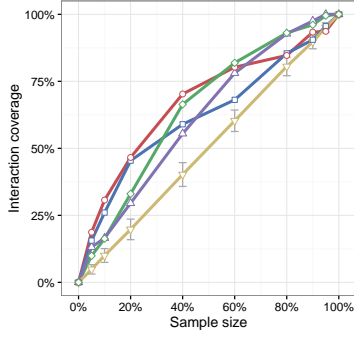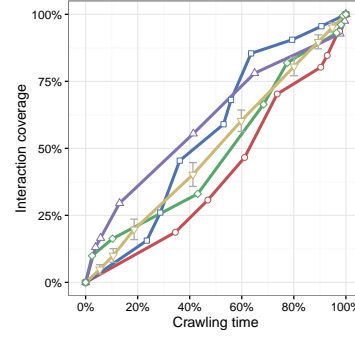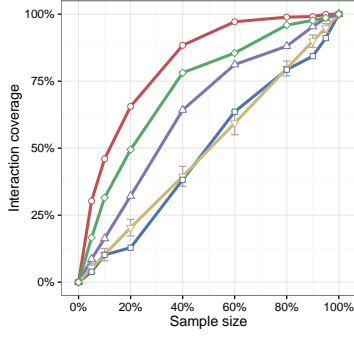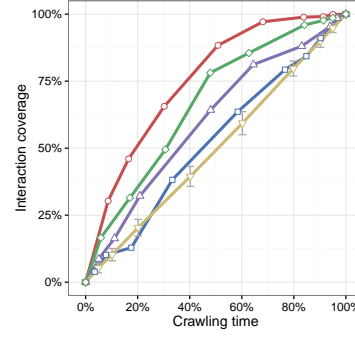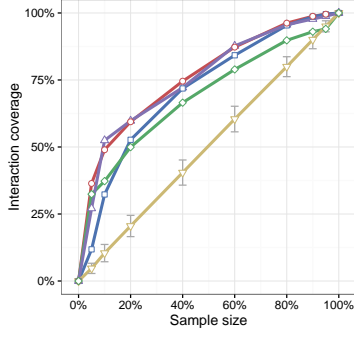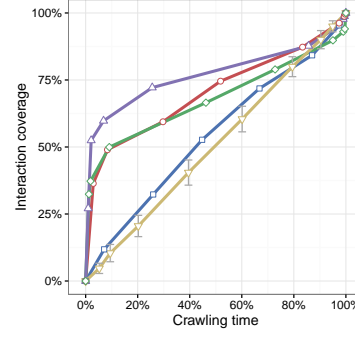

Continued on next page

**S1 Fig.** The effect of ranking with regards to number of interactions of the sample size *left figure* and crawling time *right figure* from a subset of a page's posts ranked by *number of comments*, *number of likes*, *post lifetime* and a *random sample*. The *random sample* shows the median and standard deviation for 100 runs.



10689860898

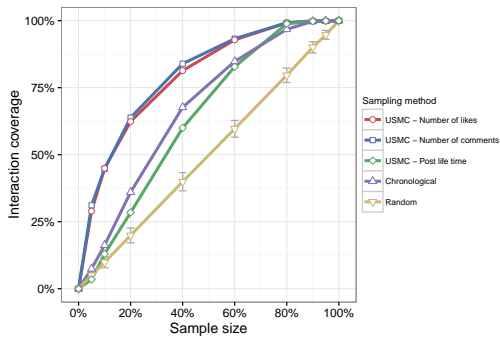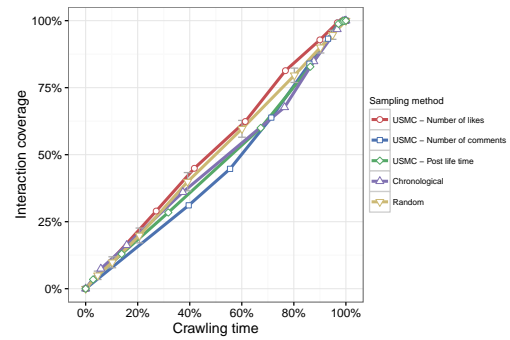

203841476411447

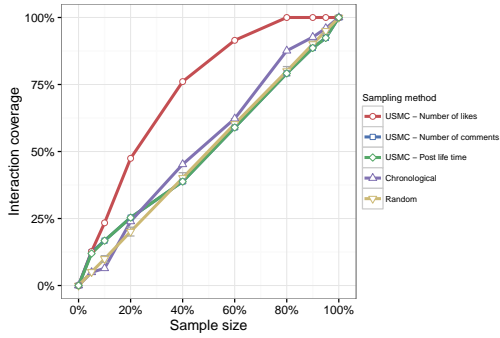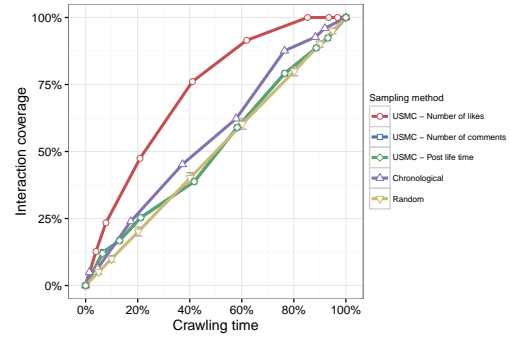

488878434469215

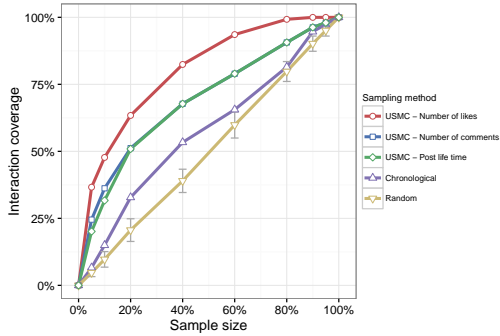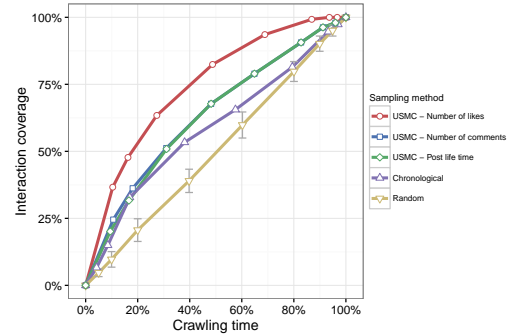

10237302714

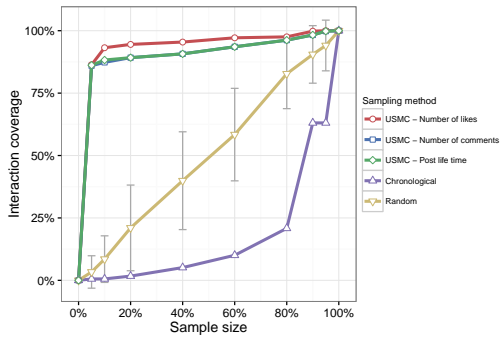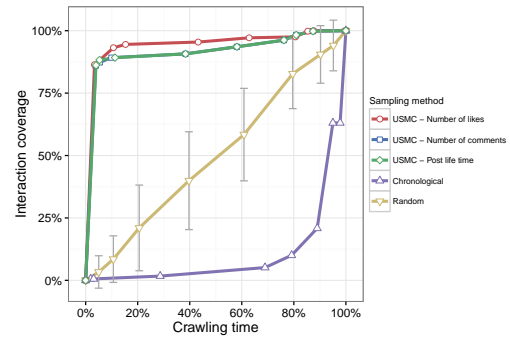

161976601328

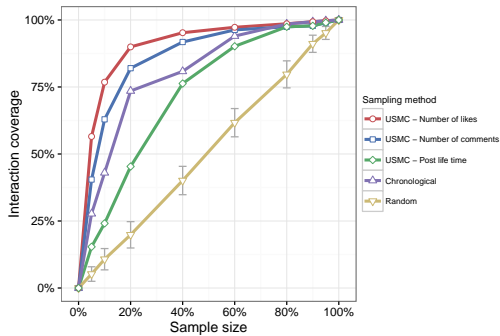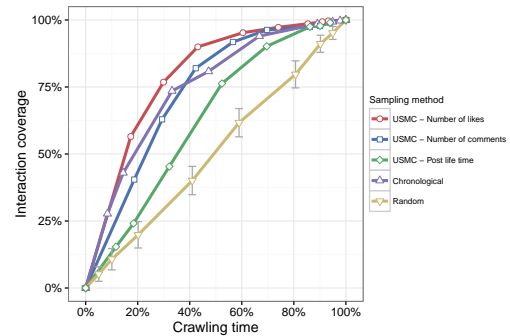

Continued on next page

**S1 Fig.** The effect of ranking with regards to number of interactions of the sample size *left figure* and crawling time *right figure* from a subset of a page's posts ranked by *number of comments*, *number of likes*, *post lifetime* and a *random sample*. The *random sample* shows the median and standard deviation for 100 runs.

6002796793

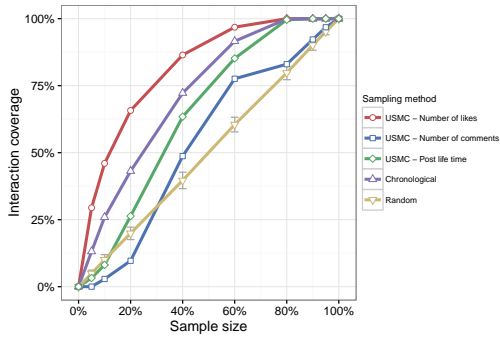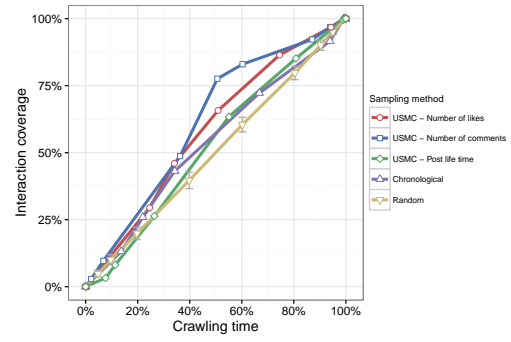

9727196242

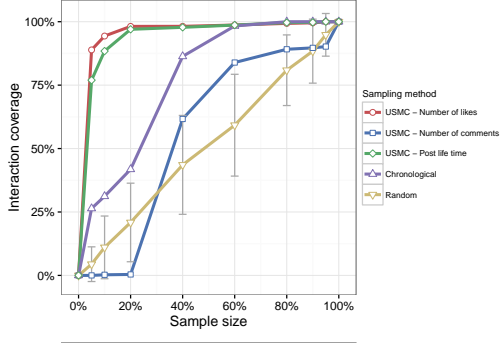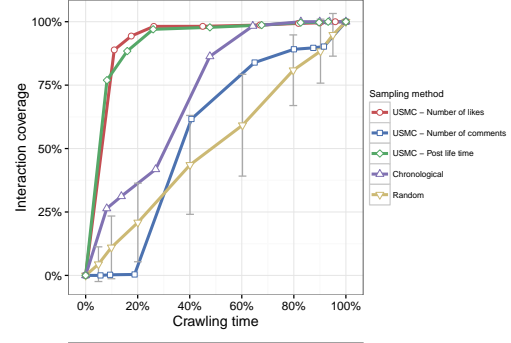

130833830320642

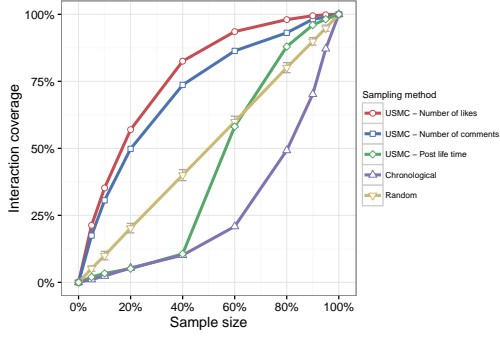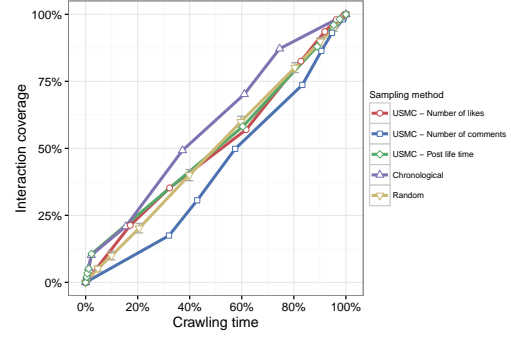

310752782271834

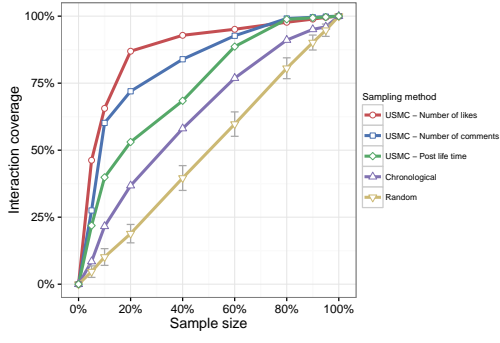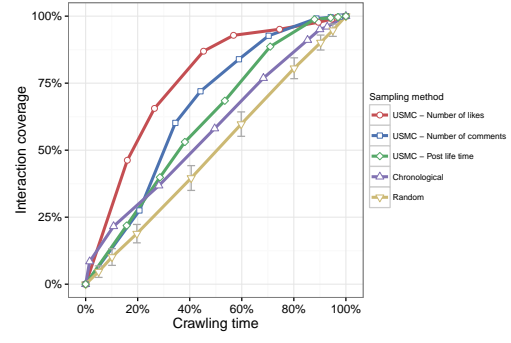

6700961047

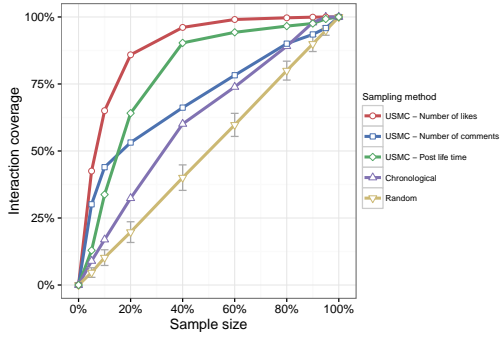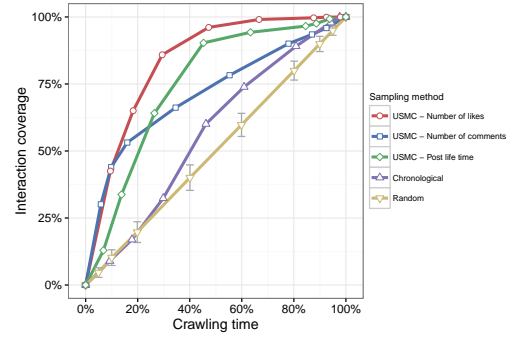

Continued on next page

**S1 Fig.** The effect of ranking with regards to number of interactions of the sample size *left figure* and crawling time *right figure* from a subset of a page's posts ranked by *number of comments*, *number of likes*, *post lifetime* and a *random sample*. The *random sample* shows the median and standard deviation for 100 runs.

251797246747

121219973056

146839468660306

134193140910

15554410418

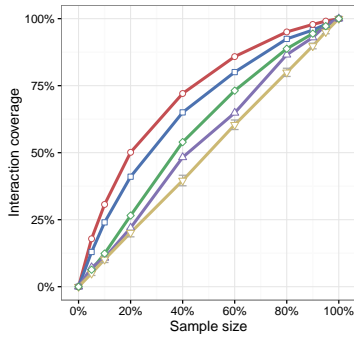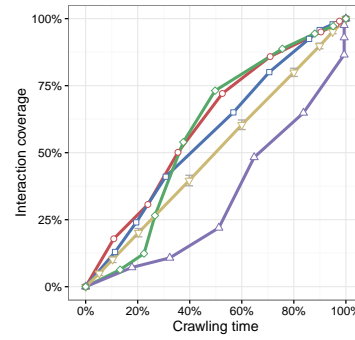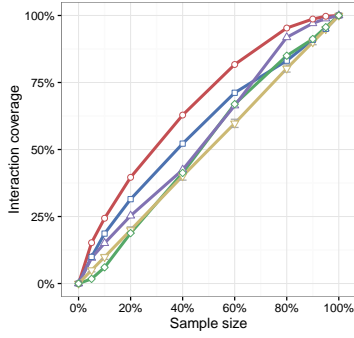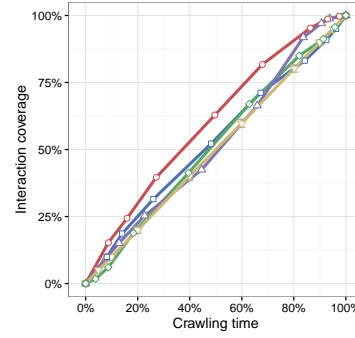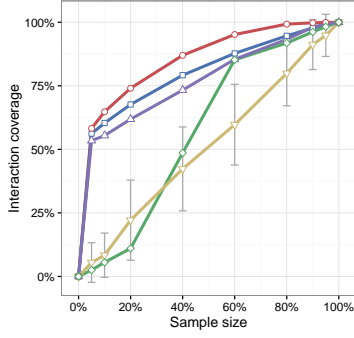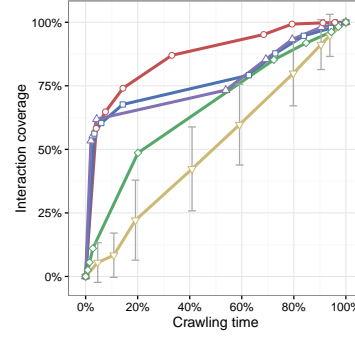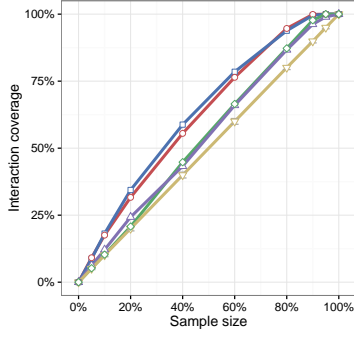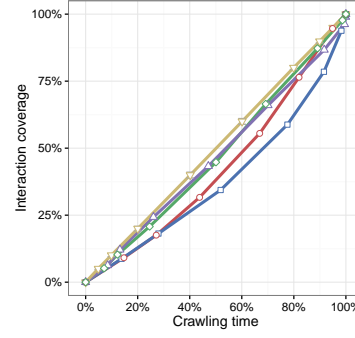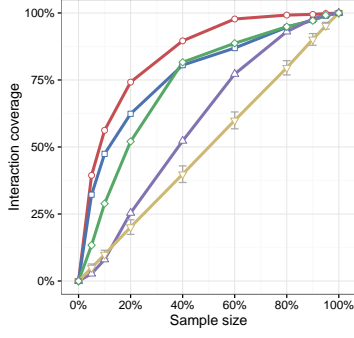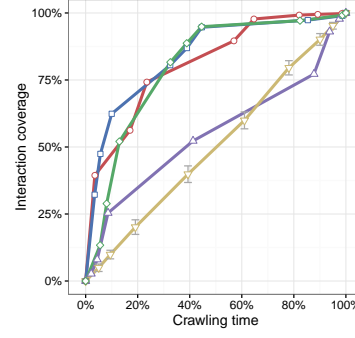

Continued on next page

**S1 Fig.** The effect of ranking with regards to number of interactions of the sample size *left figure* and crawling time *right figure* from a subset of a page's posts ranked by *number of comments*, *number of likes*, *post lifetime* and a *random sample*. The *random sample* shows the median and standard deviation for 100 runs.

15755709838

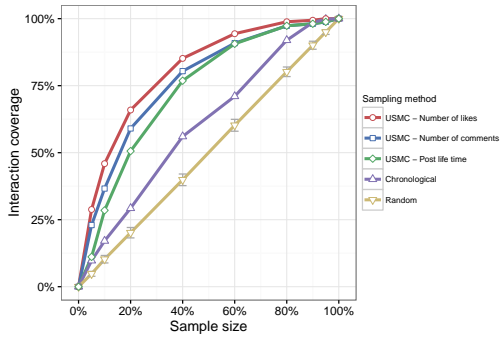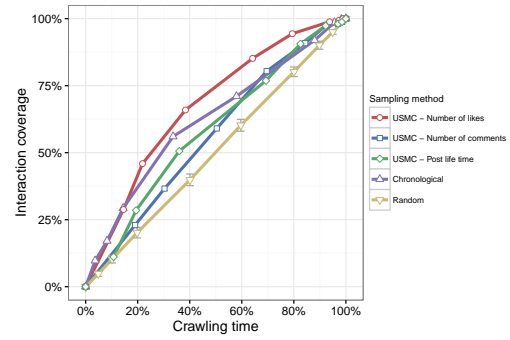

195152223850783

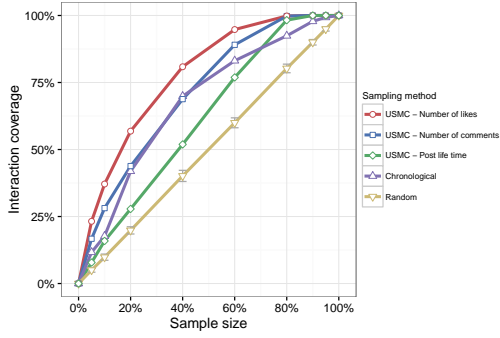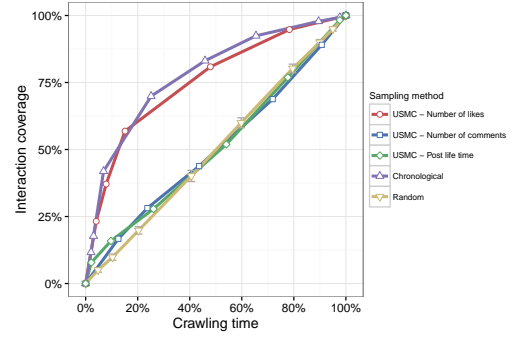

268228483234

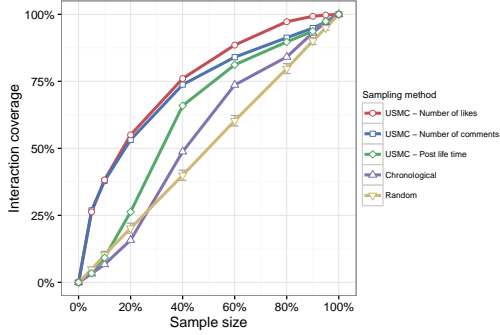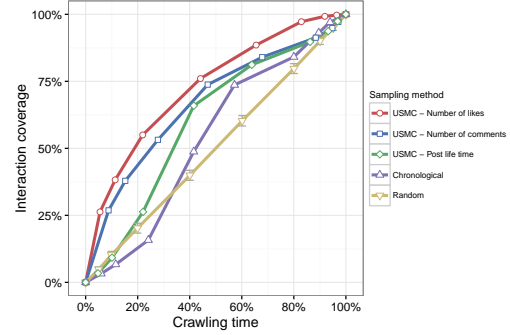

19286773617

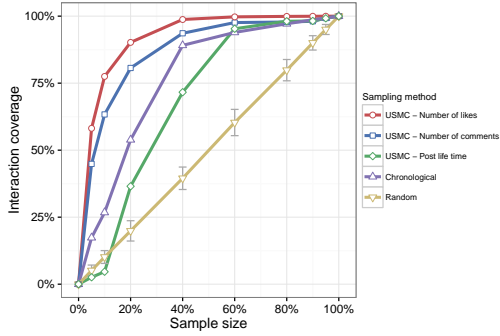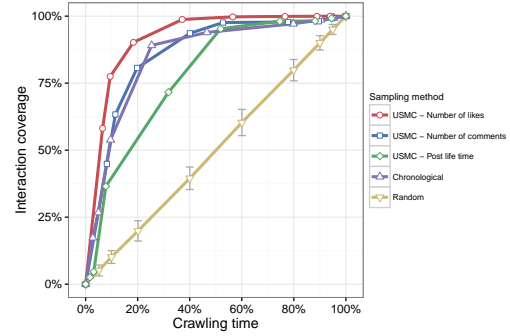

14593495515570

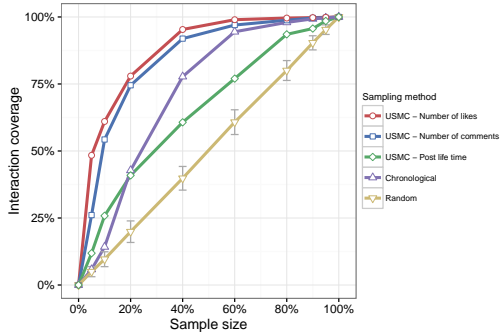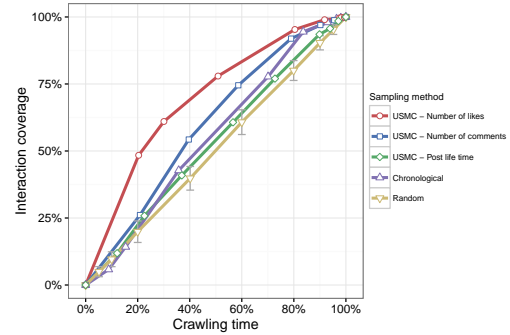

Continued on next page

**S1 Fig.** The effect of ranking with regards to number of interactions of the sample size *left figure* and crawling time *right figure* from a subset of a page's posts ranked by *number of comments*, *number of likes*, *post lifetime* and a *random sample*. The *random sample* shows the median and standard deviation for 100 runs.

16871848717

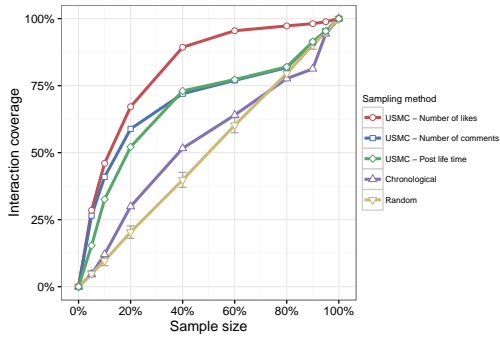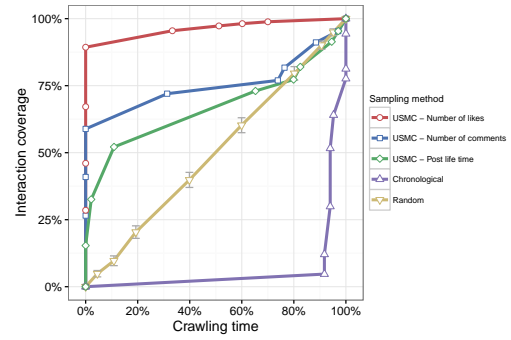

11132188727

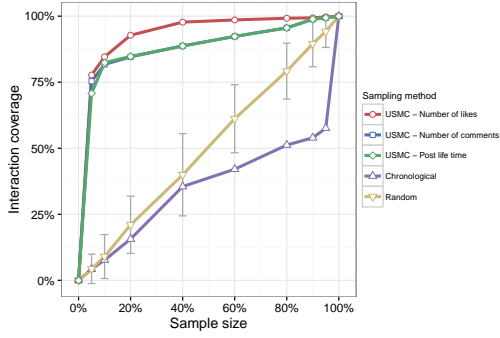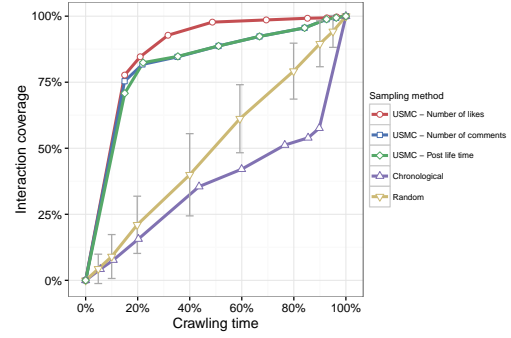

10737653985

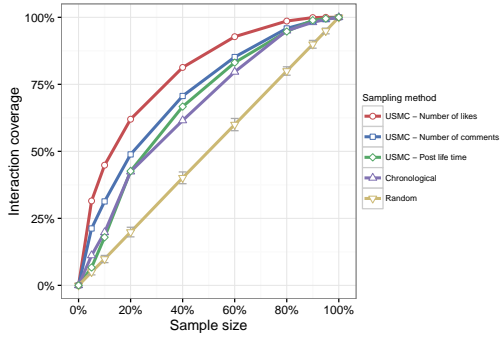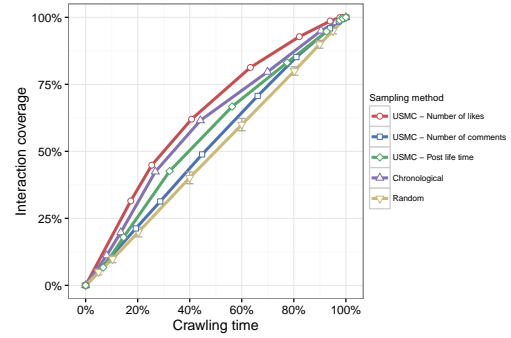

150499681635588

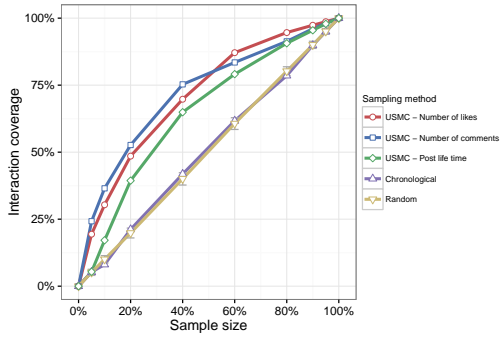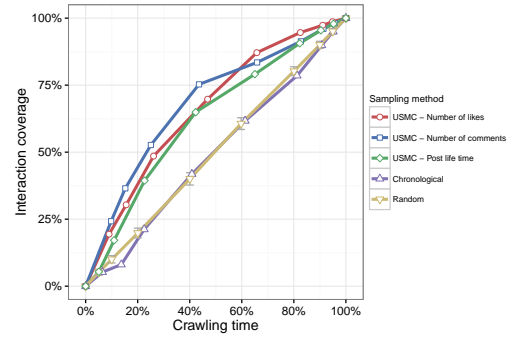

5883973269

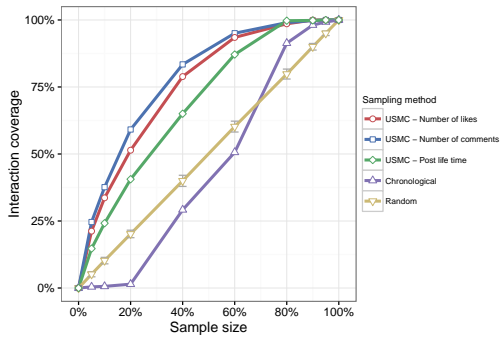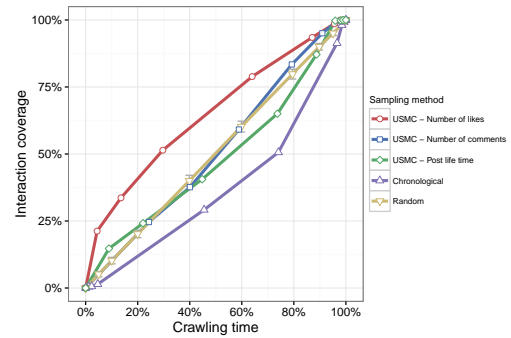

Continued on next page

**S1 Fig.** The effect of ranking with regards to number of interactions of the sample size *left figure* and crawling time *right figure* from a subset of a page's posts ranked by *number of comments*, *number of likes*, *post lifetime* and a *random sample*. The *random sample* shows the median and standard deviation for 100 runs.

7691064634

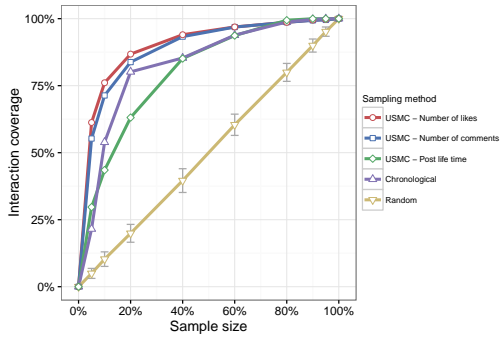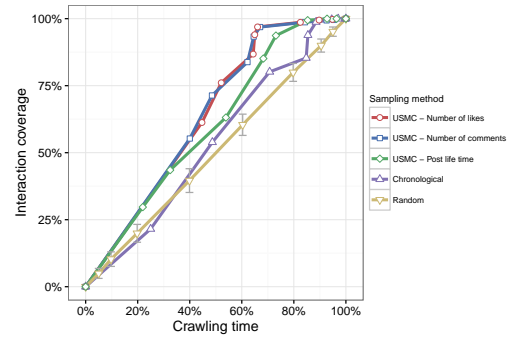

99219862934

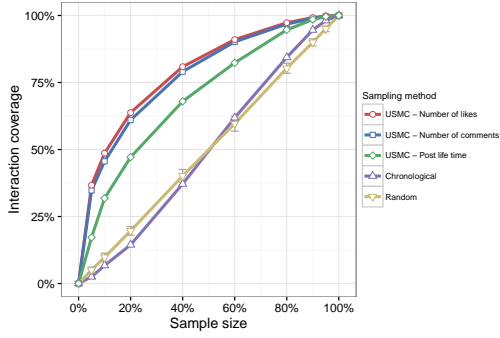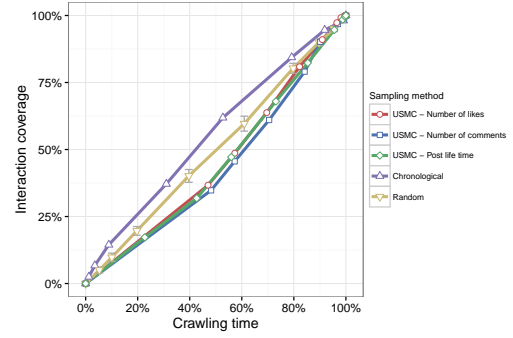

17382788643

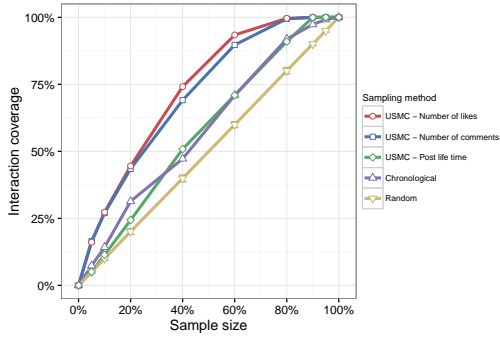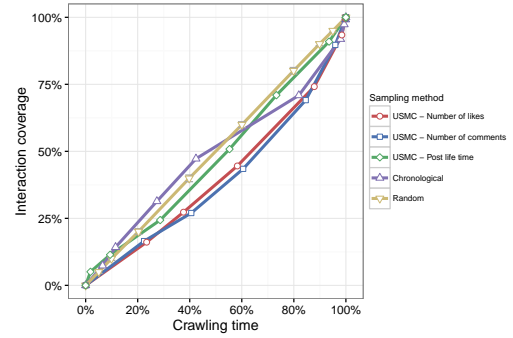

295474380481252

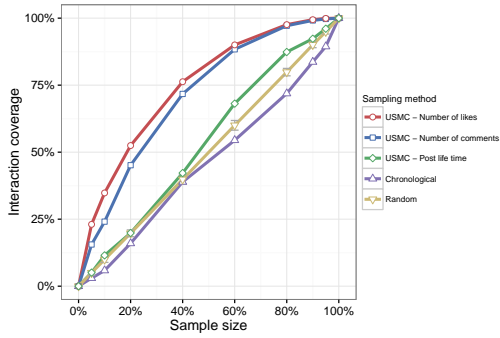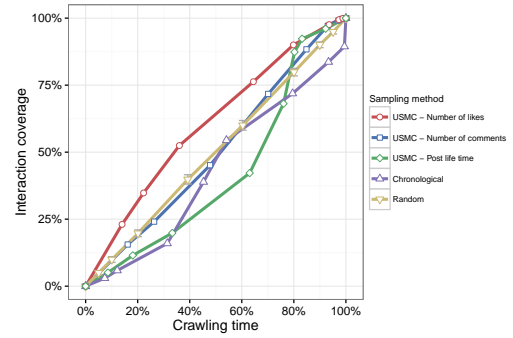

10901008068

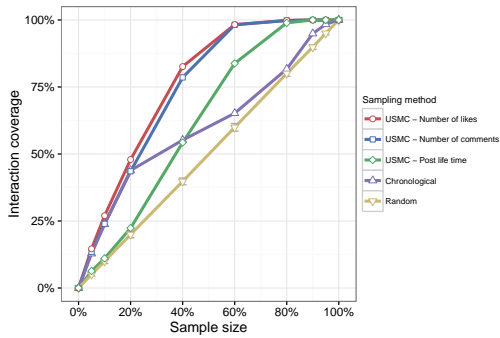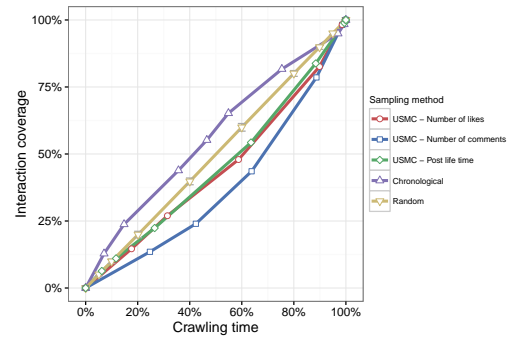

Continued on next page

**S1 Fig.** The effect of ranking with regards to number of interactions of the sample size *left figure* and crawling time *right figure* from a subset of a page's posts ranked by *number of comments*, *number of likes*, *post lifetime* and a *random sample*. The *random sample* shows the median and standard deviation for 100 runs.

132728146765723

8031842923

218502344846561

196008660929

186901908014467

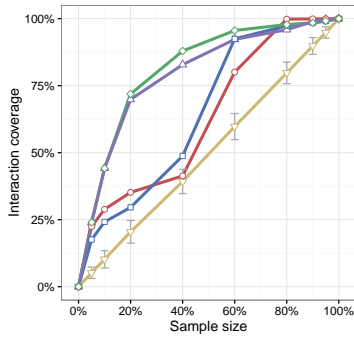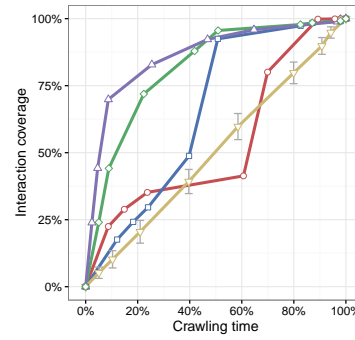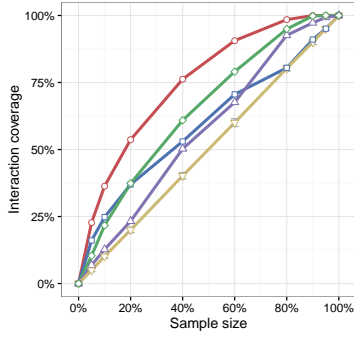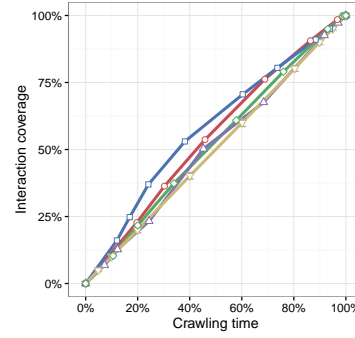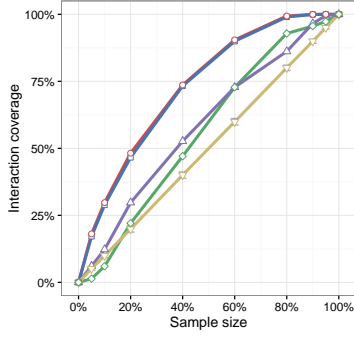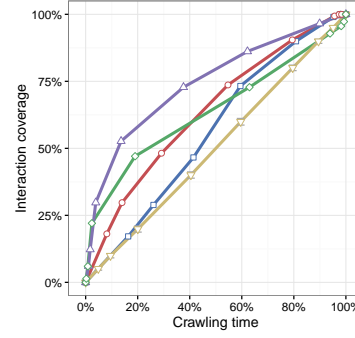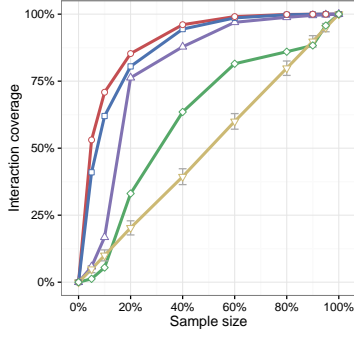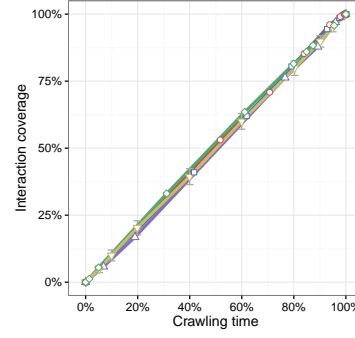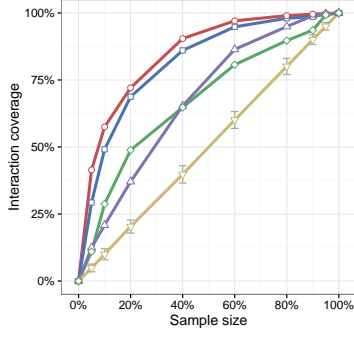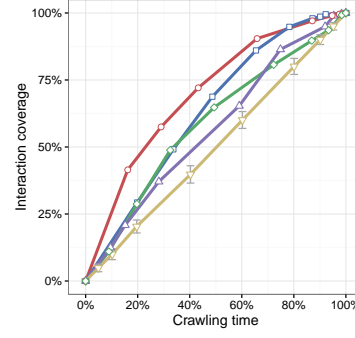

Continued on next page

**S1 Fig.** The effect of ranking with regards to number of interactions of the sample size *left figure* and crawling time *right figure* from a subset of a page's posts ranked by *number of comments*, *number of likes*, *post lifetime* and a *random sample*. The *random sample* shows the median and standard deviation for 100 runs.

121128974566421

261098770903

126385310775420

8725012666

6334782252

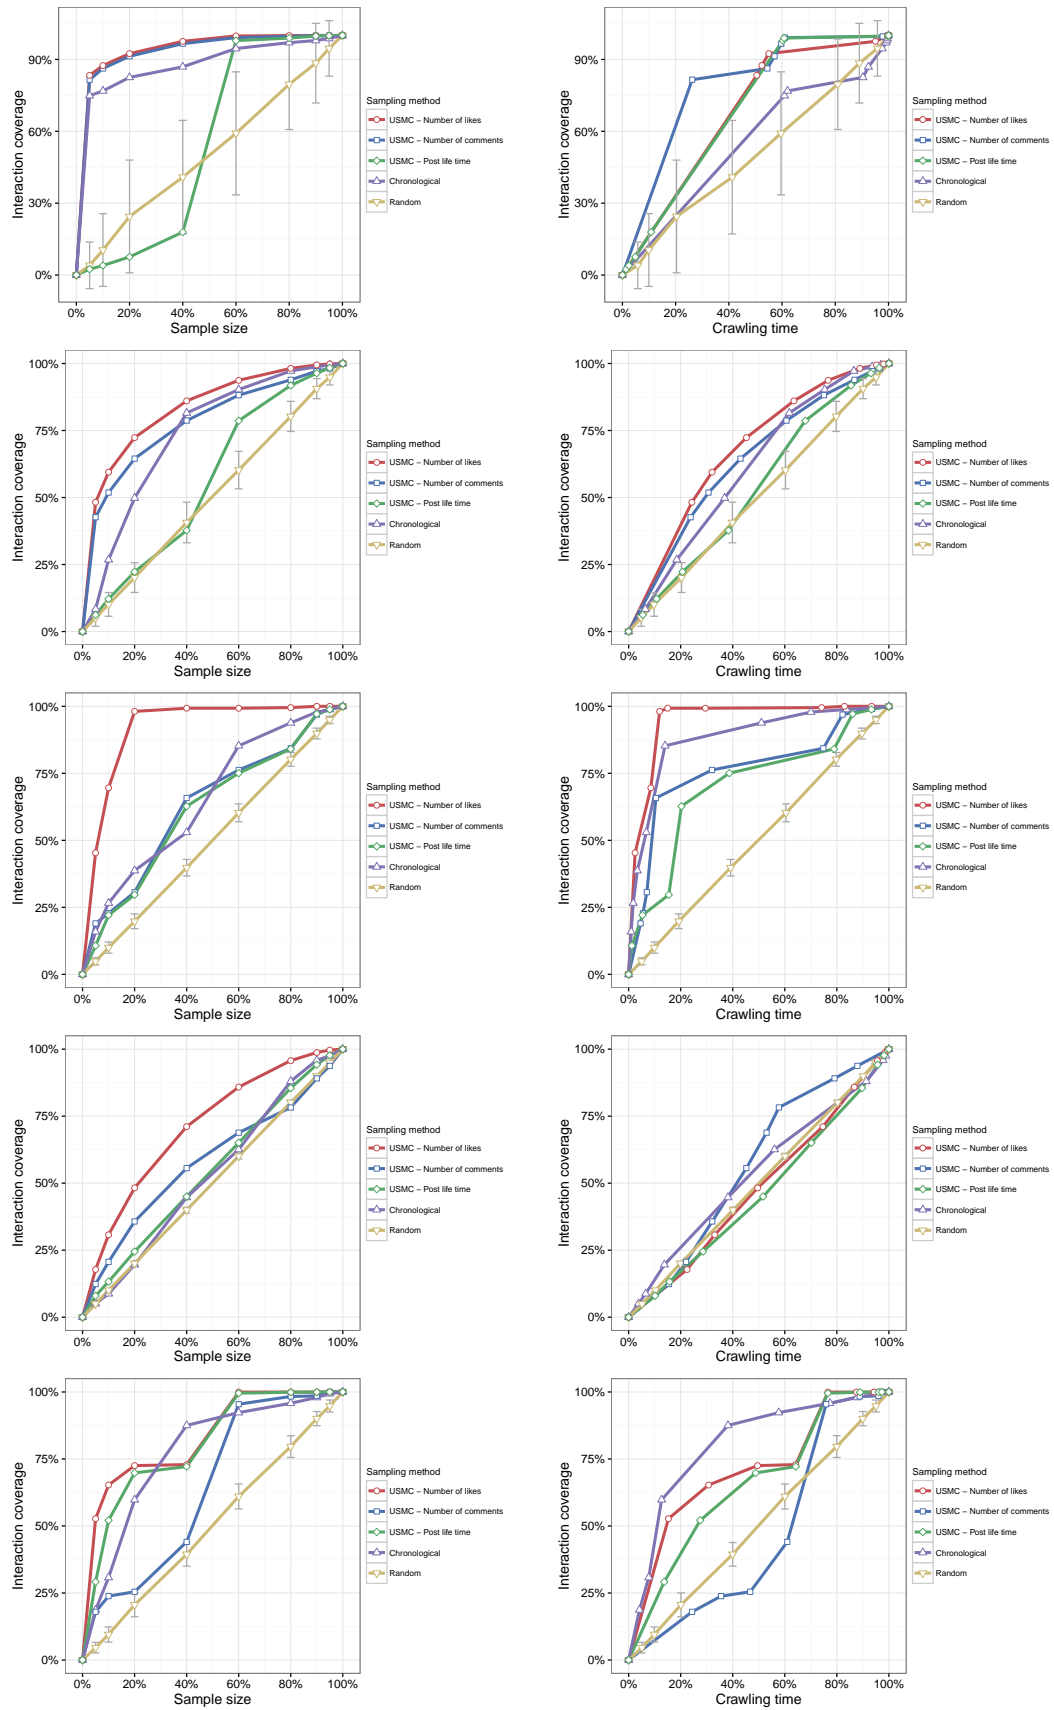

Continued on next page

**S1 Fig.** The effect of ranking with regards to number of interactions of the sample size *left figure* and crawling time *right figure* from a subset of a page's posts ranked by *number of comments*, *number of likes*, *post lifetime* and a *random sample*. The *random sample* shows the median and standard deviation for 100 runs.



282571518441363

174431941806

169629069729559

42145905998

166785736790960

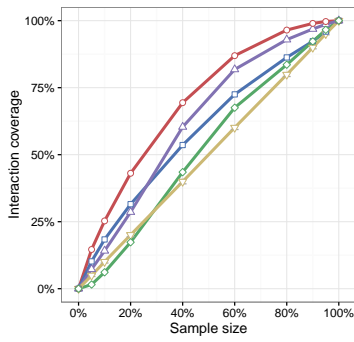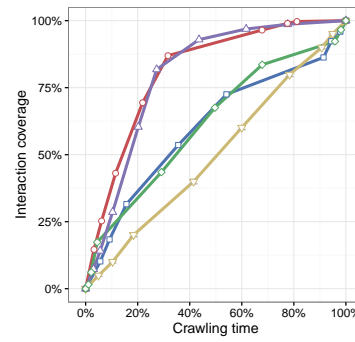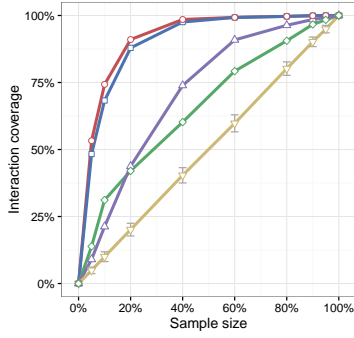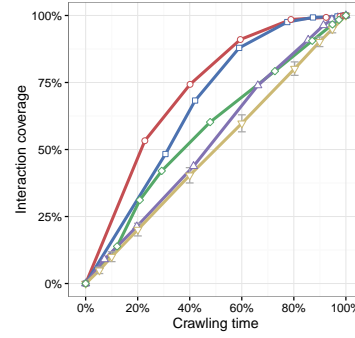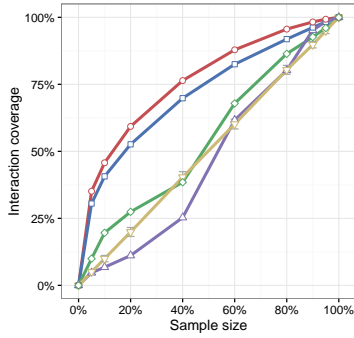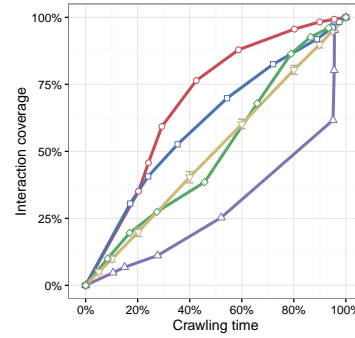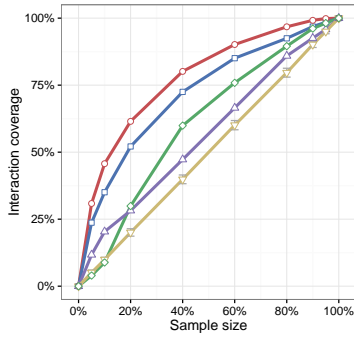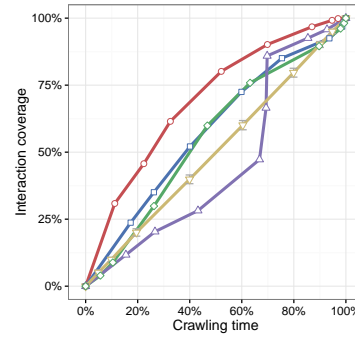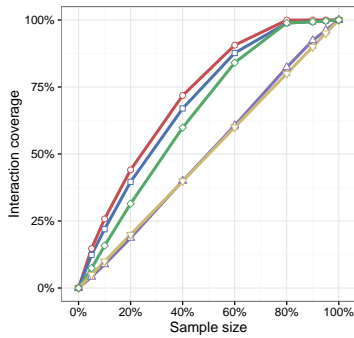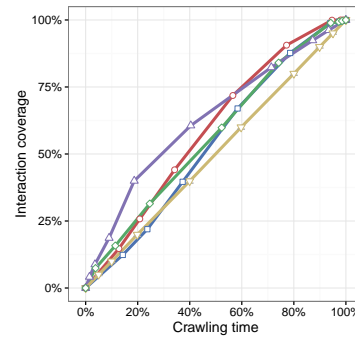

Continued on next page

**S1 Fig.** The effect of ranking with regards to number of interactions of the sample size *left figure* and crawling time *right figure* from a subset of a page's posts ranked by *number of comments*, *number of likes*, *post lifetime* and a *random sample*. The *random sample* shows the median and standard deviation for 100 runs.

18651374805

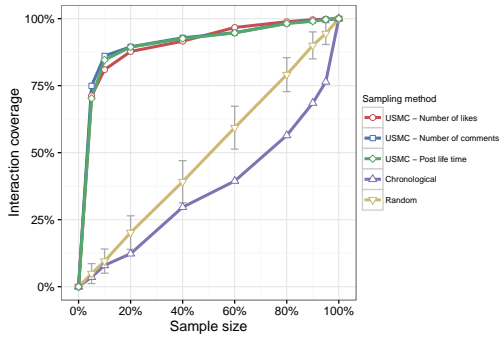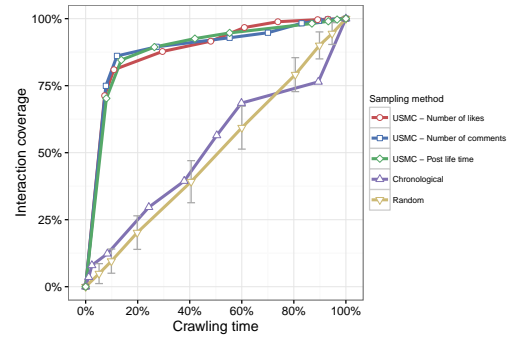

144917055340

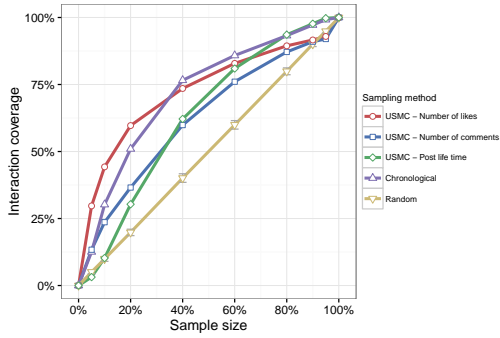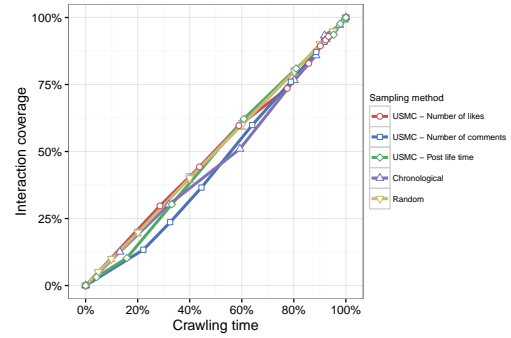

226402156107

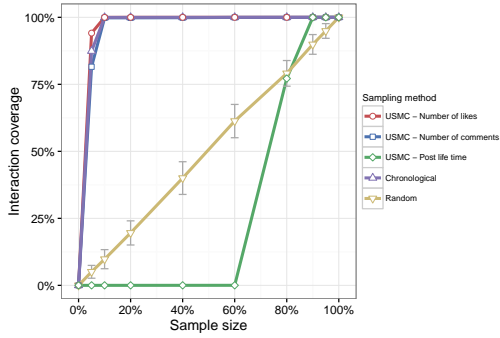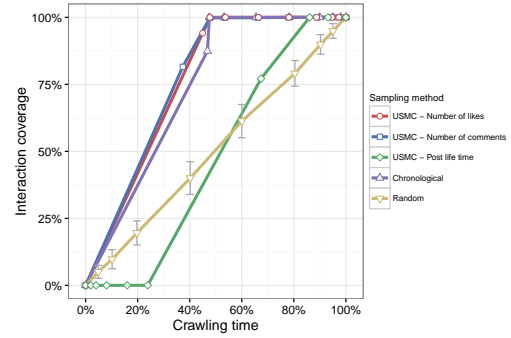

5618127822

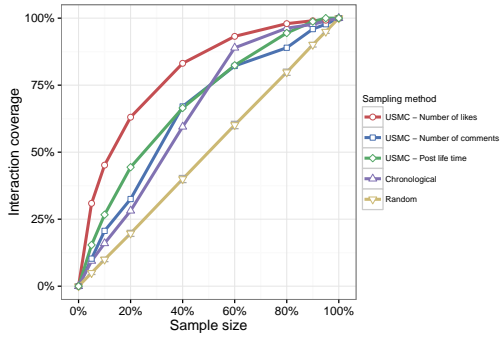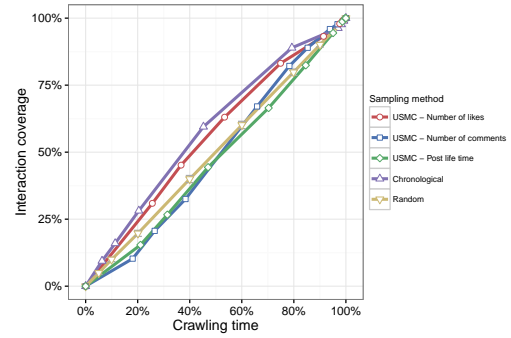

16792472126

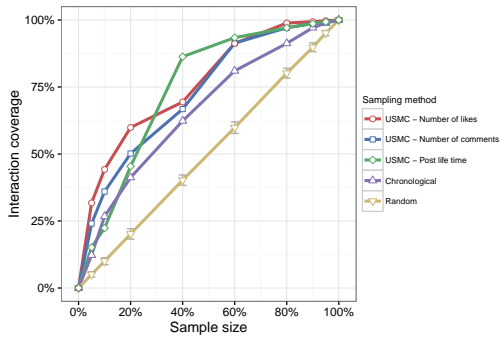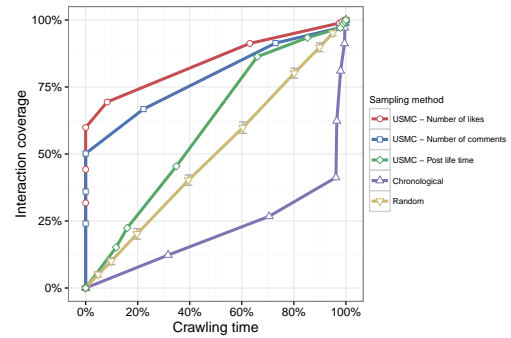

Continued on next page

**S1 Fig.** The effect of ranking with regards to number of interactions of the sample size *left figure* and crawling time *right figure* from a subset of a page's posts ranked by *number of comments*, *number of likes*, *post lifetime* and a *random sample*. The *random sample* shows the median and standard deviation for 100 runs.

174009145975879

144511635581827

302896416450257

152358668171541

6204742571

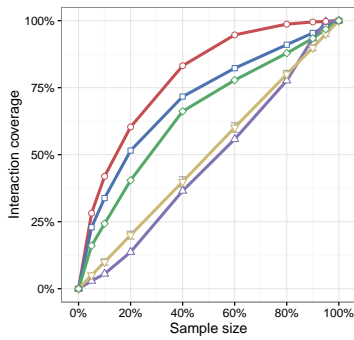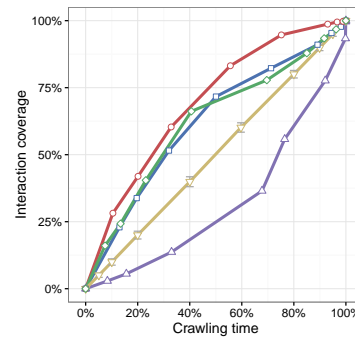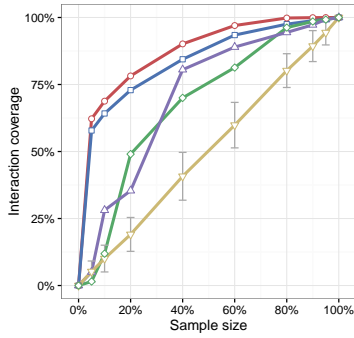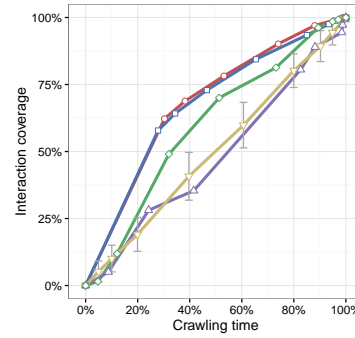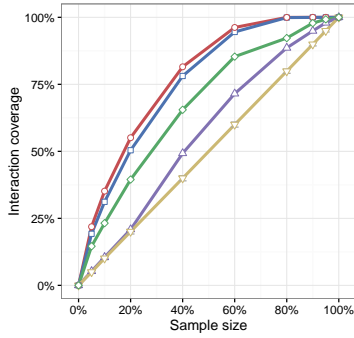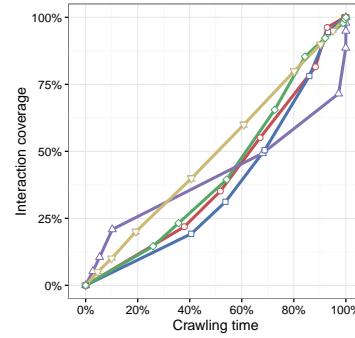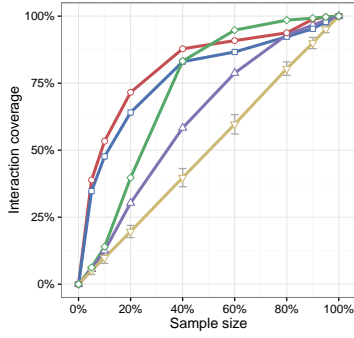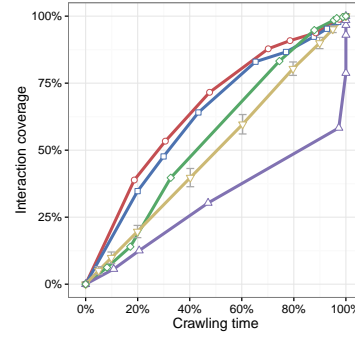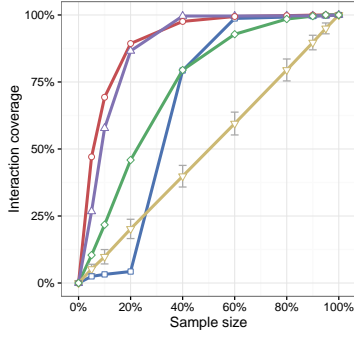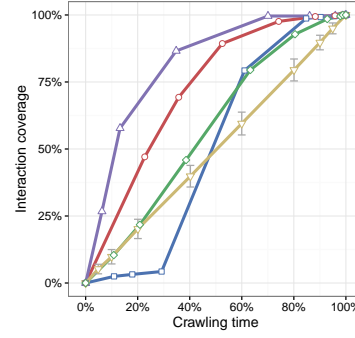

Continued on next page

**S1 Fig.** The effect of ranking with regards to number of interactions of the sample size *left figure* and crawling time *right figure* from a subset of a page's posts ranked by *number of comments*, *number of likes*, *post lifetime* and a *random sample*. The *random sample* shows the median and standard deviation for 100 runs.

136264019722601

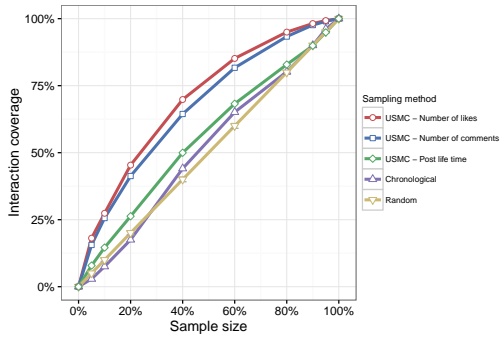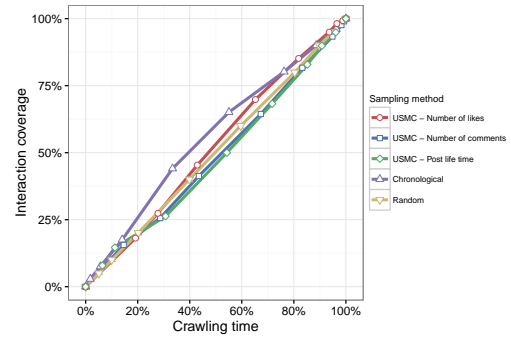

8114223318

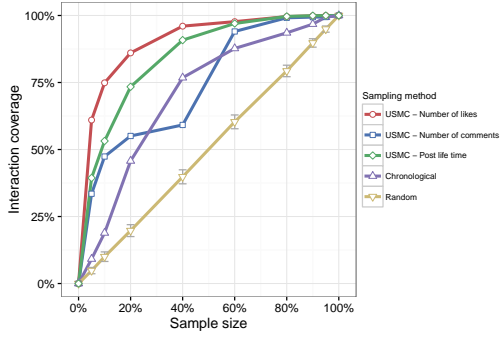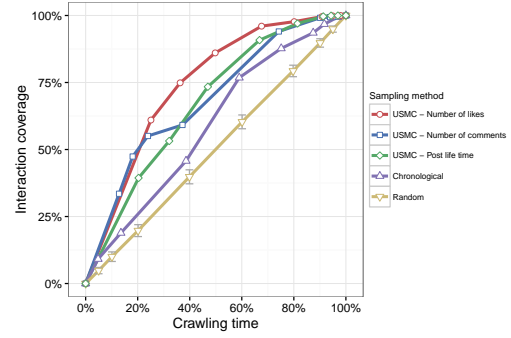

6815841748

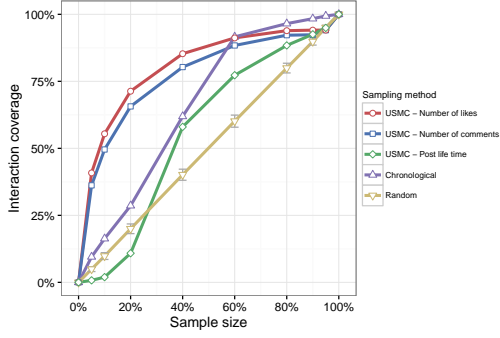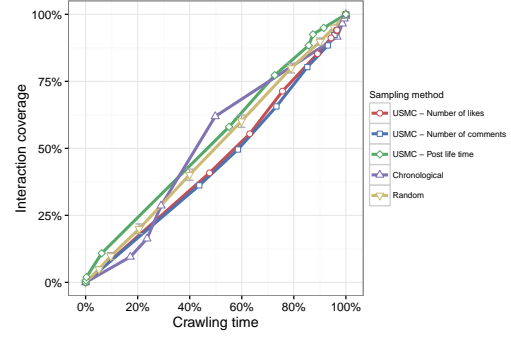

30775112500

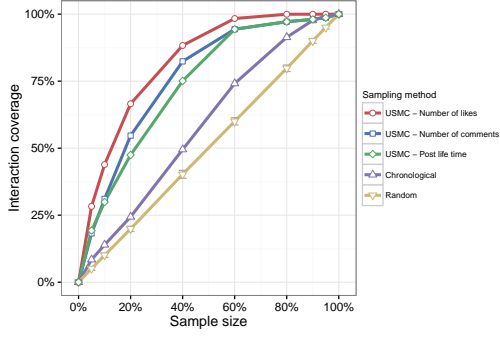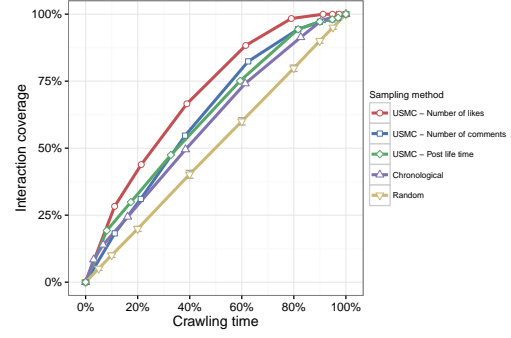

178713385549168

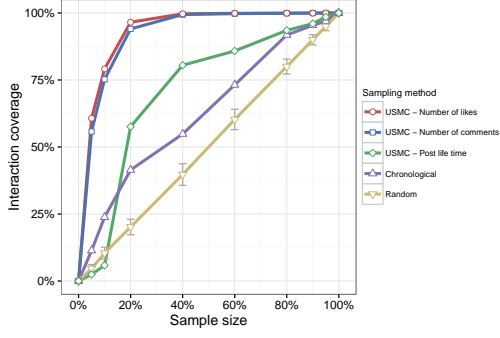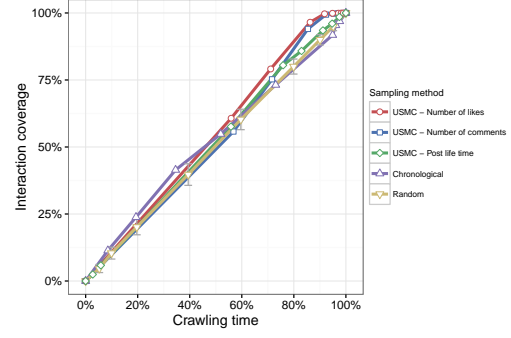

Continued on next page

**S1 Fig.** The effect of ranking with regards to number of interactions of the sample size *left figure* and crawling time *right figure* from a subset of a page's posts ranked by *number of comments*, *number of likes*, *post lifetime* and a *random sample*. The *random sample* shows the median and standard deviation for 100 runs.

178435075560368

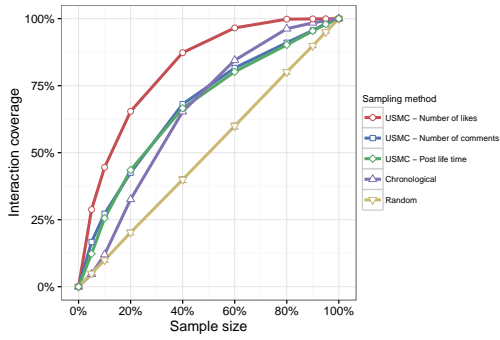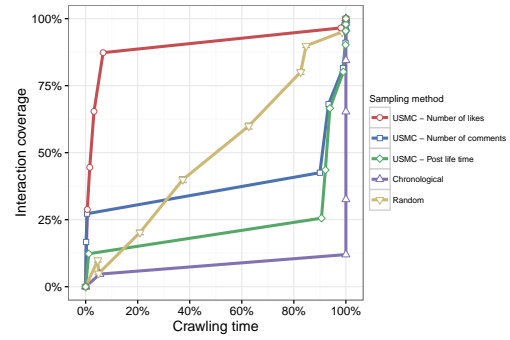

164505093569983

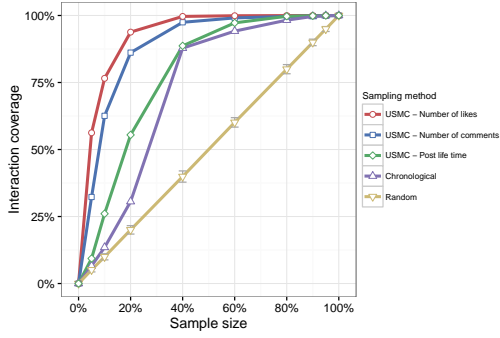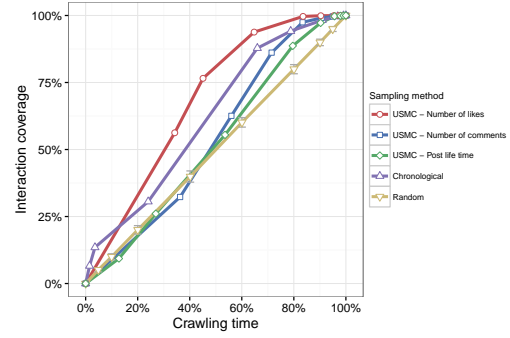

178191330369

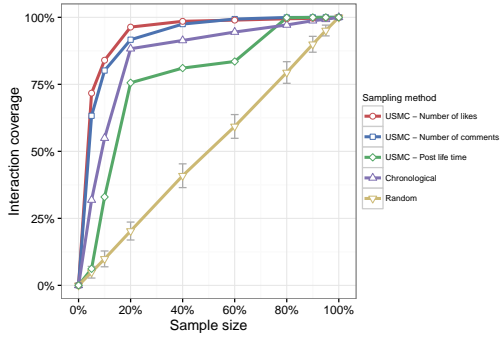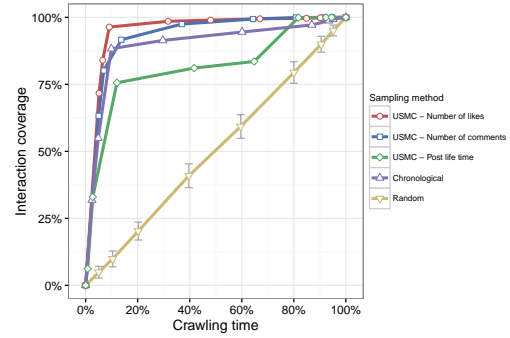

154957517930371

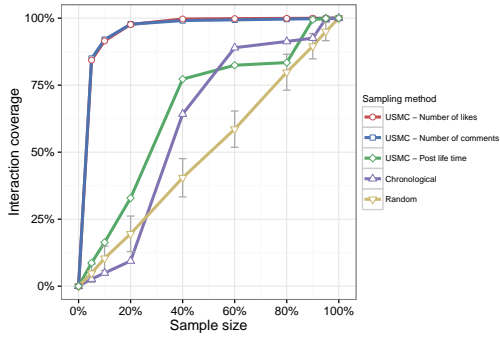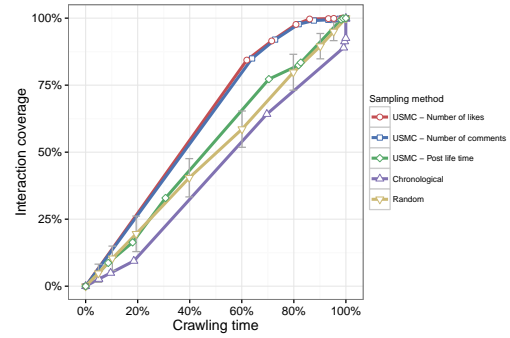

8002590959

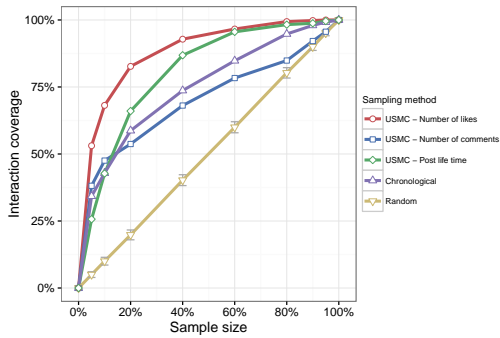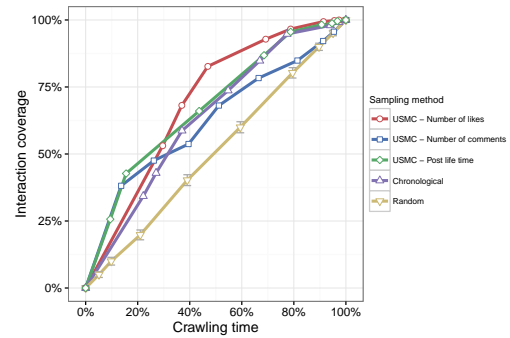

Continued on next page

**S1 Fig.** The effect of ranking with regards to number of interactions of the sample size *left figure* and crawling time *right figure* from a subset of a page's posts ranked by *number of comments*, *number of likes*, *post lifetime* and a *random sample*. The *random sample* shows the median and standard deviation for 100 runs.

135155166518704

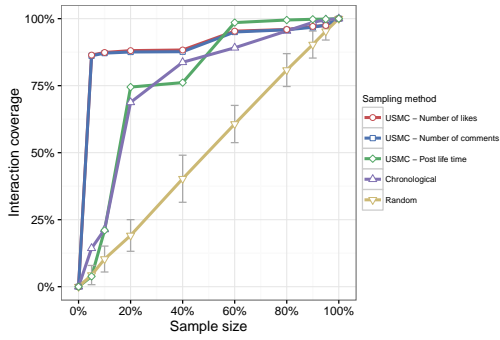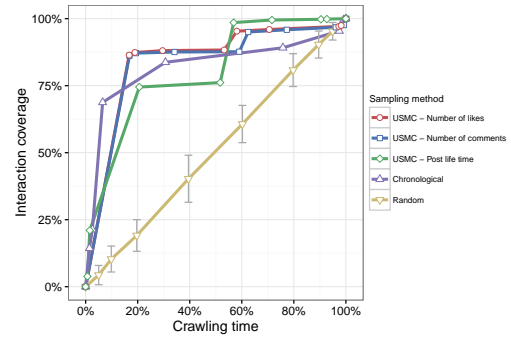

150864087963

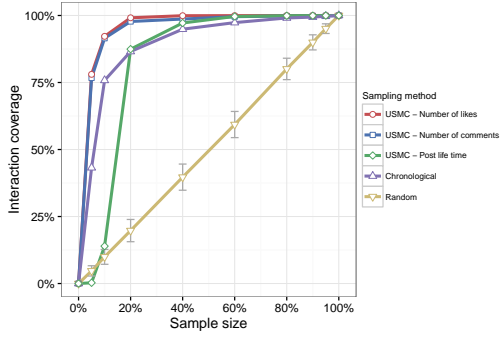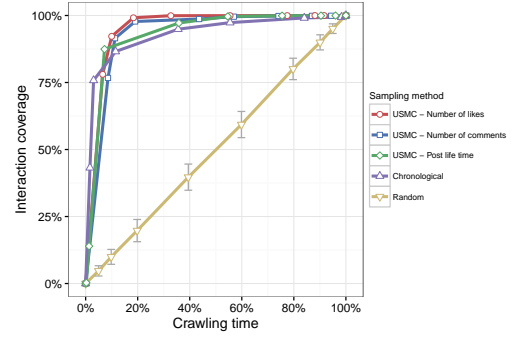

76026867998

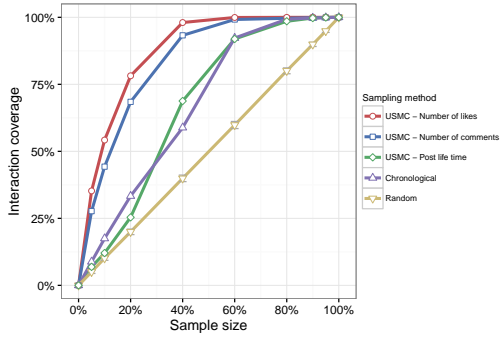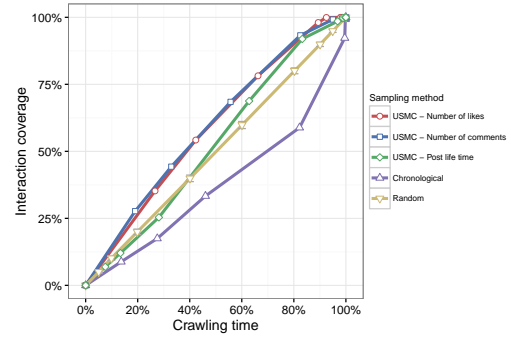

18493706927

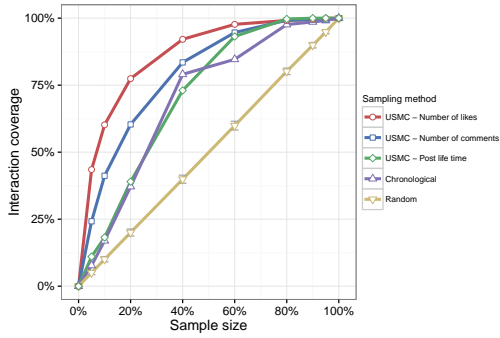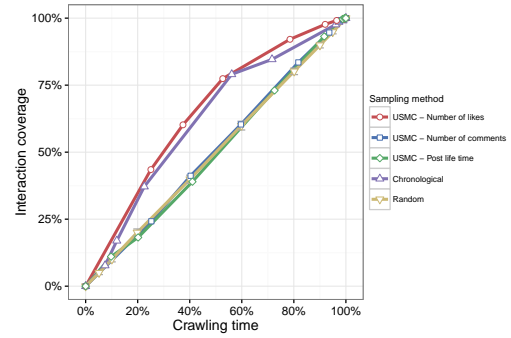

120963705931

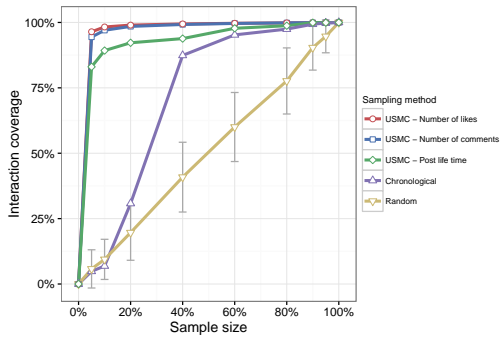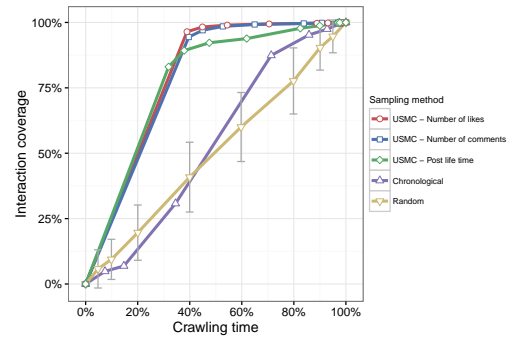

Continued on next page

**S1 Fig.** The effect of ranking with regards to number of interactions of the sample size *left figure* and crawling time *right figure* from a subset of a page's posts ranked by *number of comments*, *number of likes*, *post lifetime* and a *random sample*. The *random sample* shows the median and standard deviation for 100 runs.

99489209116

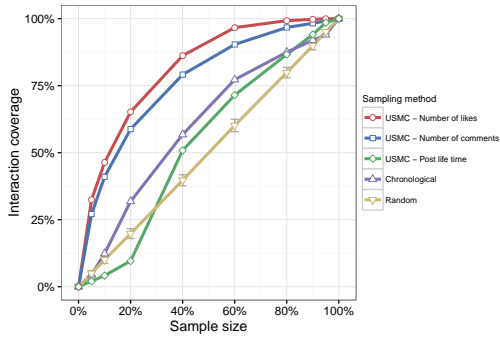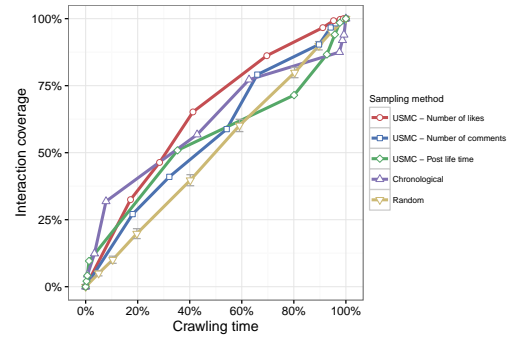

98029424570

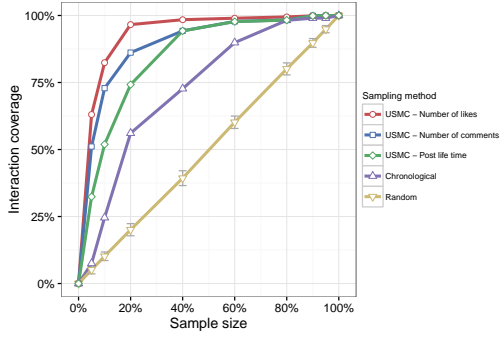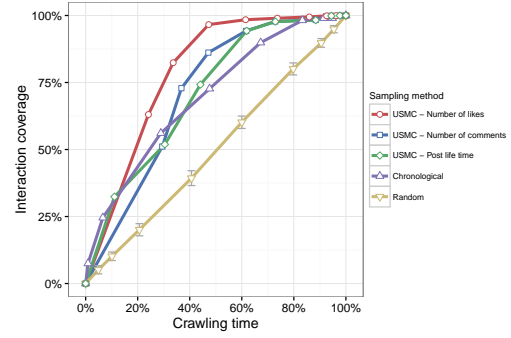

201728286564087

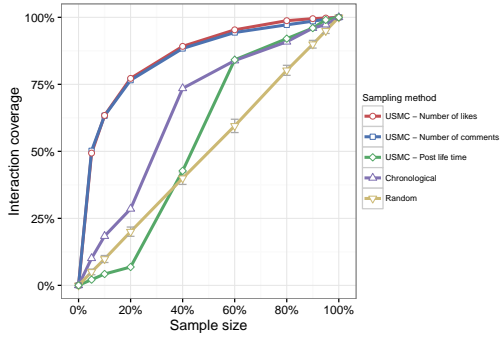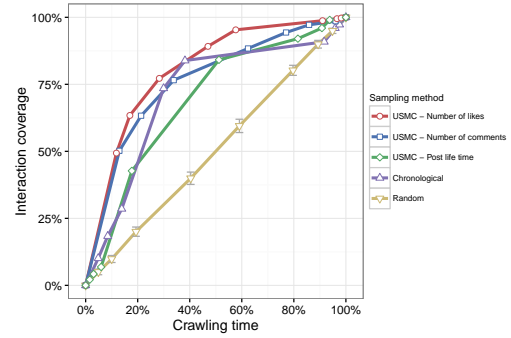

6289201895

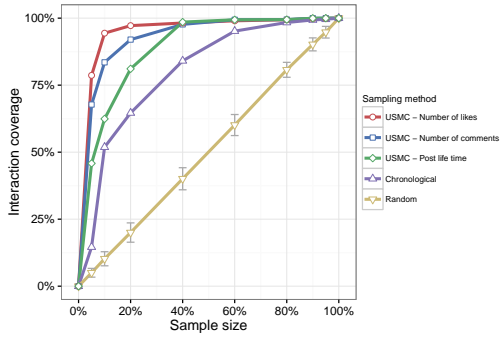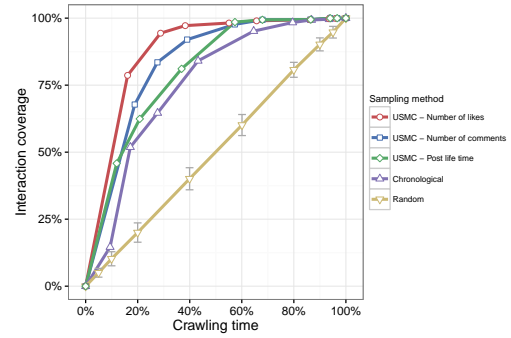

250083749935

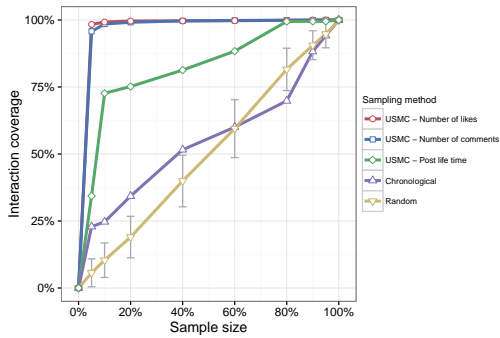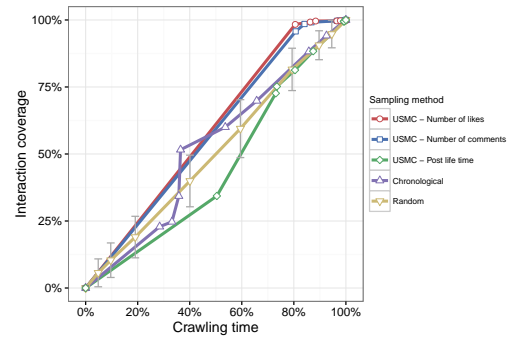

Continued on next page

**S1 Fig.** The effect of ranking with regards to number of interactions of the sample size *left figure* and crawling time *right figure* from a subset of a page's posts ranked by *number of comments*, *number of likes*, *post lifetime* and a *random sample*. The *random sample* shows the median and standard deviation for 100 runs.

108919785796003

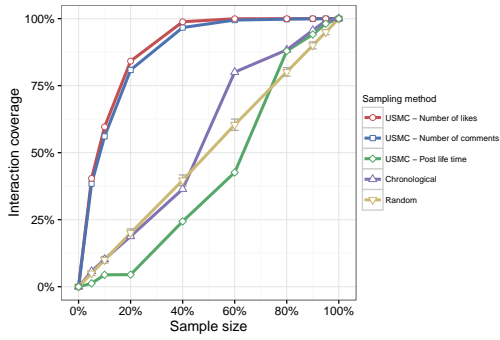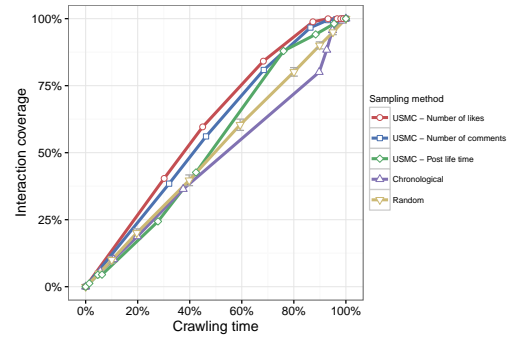

63811549237

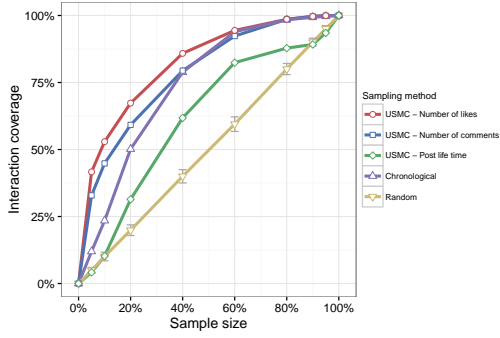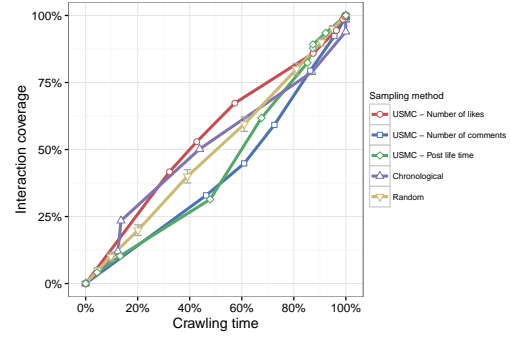

28859306498

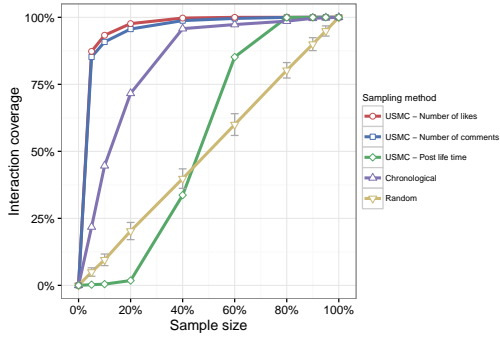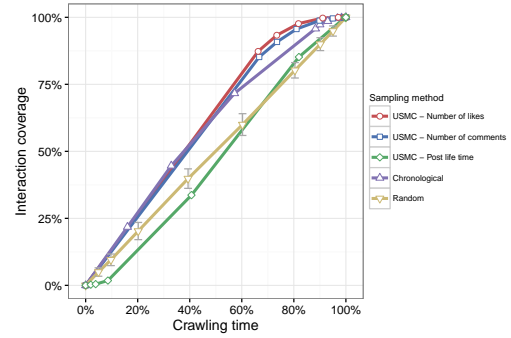

29297404727244

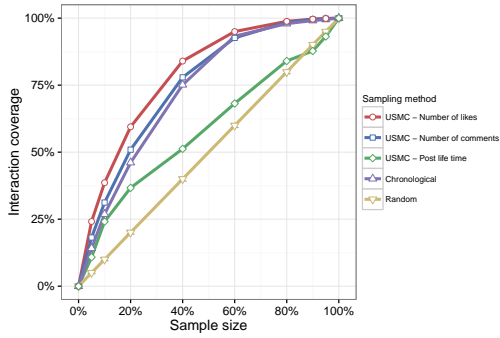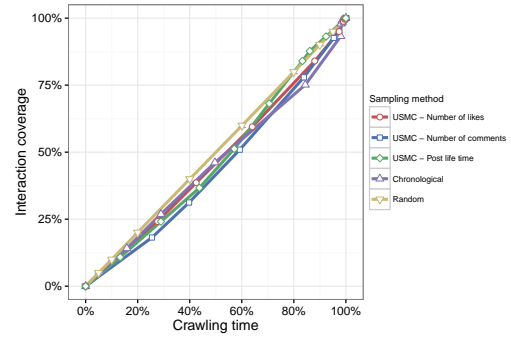

18962571991

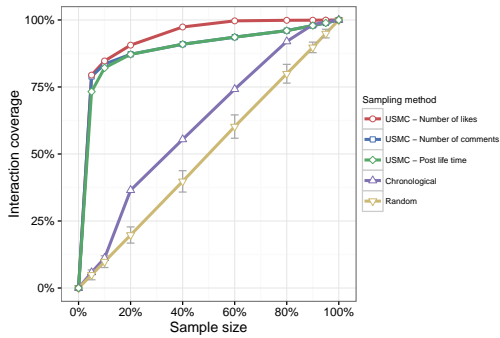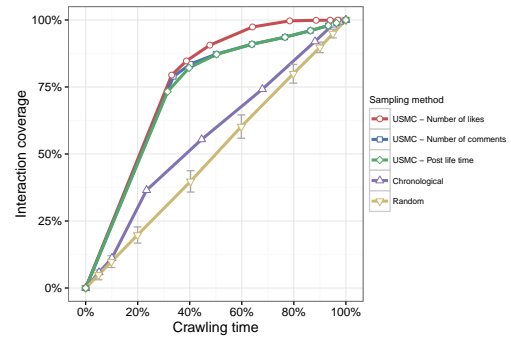

Continued on next page

**S1 Fig.** The effect of ranking with regards to number of interactions of the sample size *left figure* and crawling time *right figure* from a subset of a page's posts ranked by *number of comments*, *number of likes*, *post lifetime* and a *random sample*. The *random sample* shows the median and standard deviation for 100 runs.



258106877558909

141512340315

7717041259

157264947680409

292440510802935

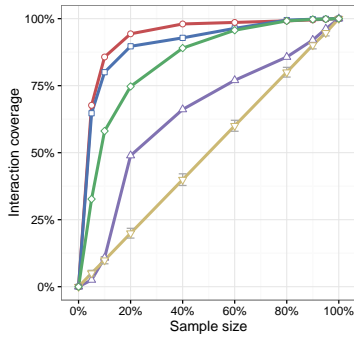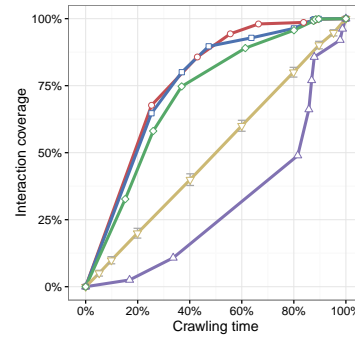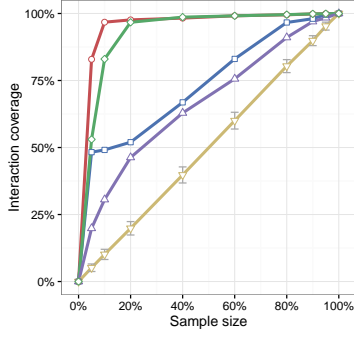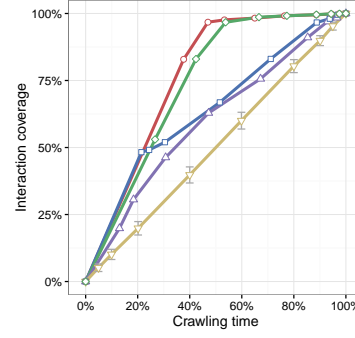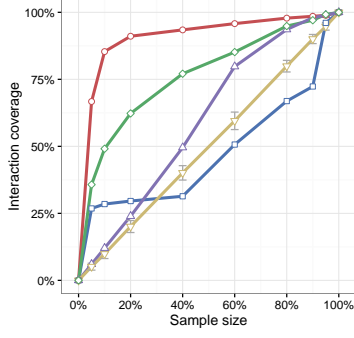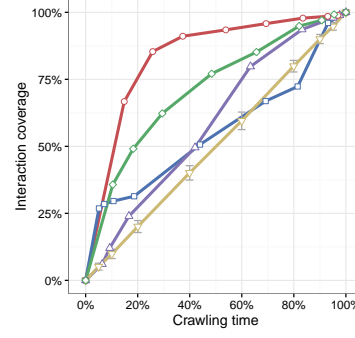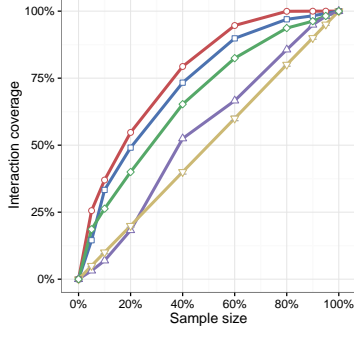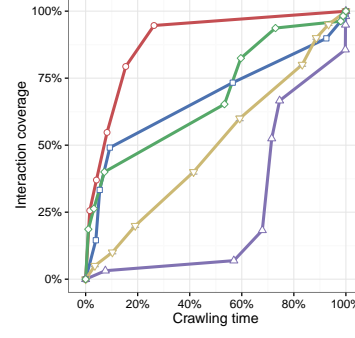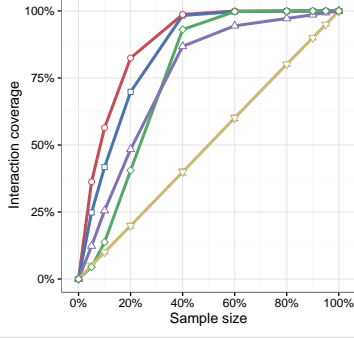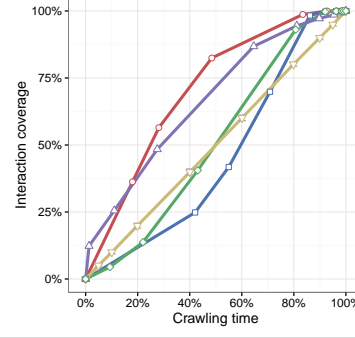

Continued on next page

**S1 Fig.** The effect of ranking with regards to number of interactions of the sample size *left figure* and crawling time *right figure* from a subset of a page's posts ranked by *number of comments*, *number of likes*, *post lifetime* and a *random sample*. The *random sample* shows the median and standard deviation for 100 runs.

6829493713

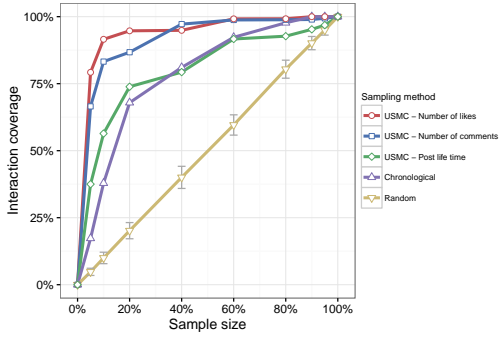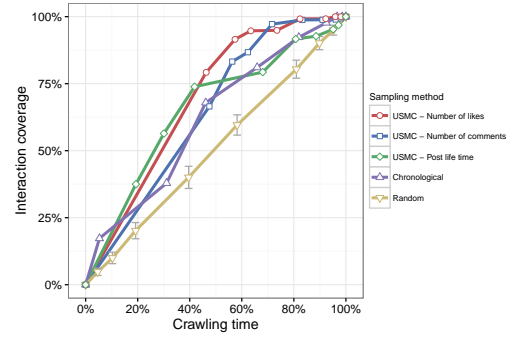

6898166798

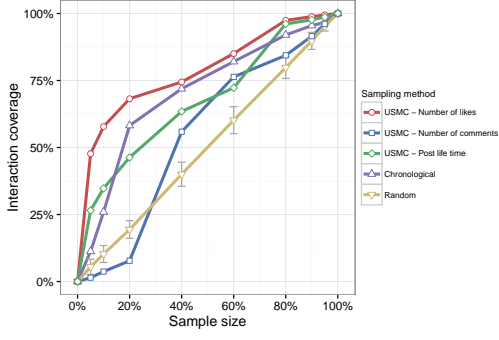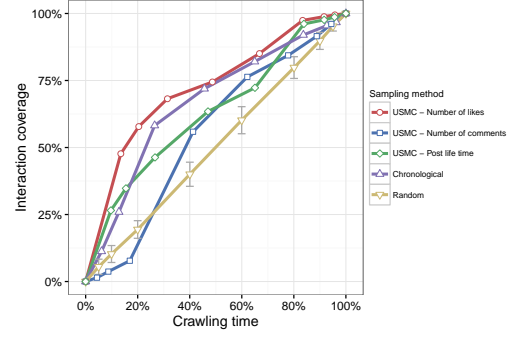

14816728107

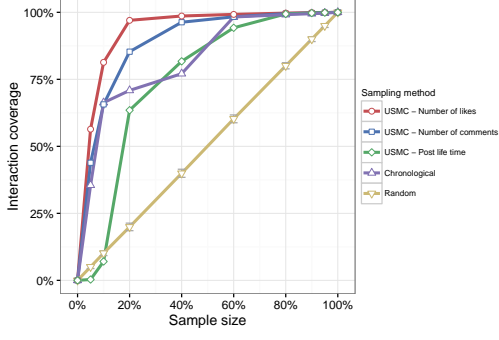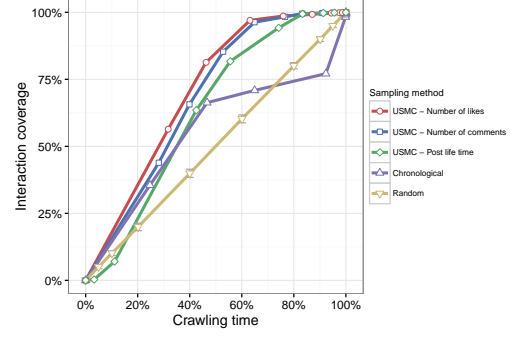

111452573760

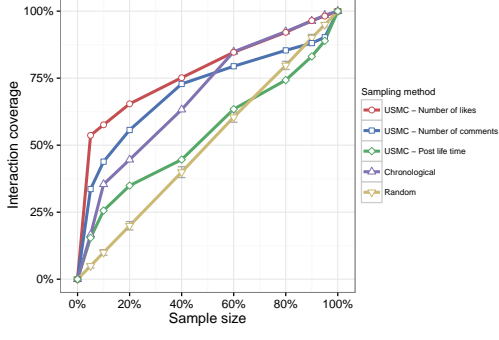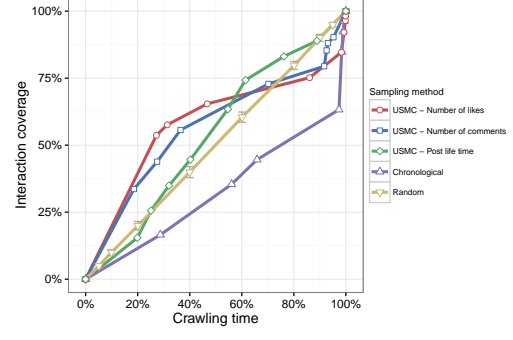

5768707450

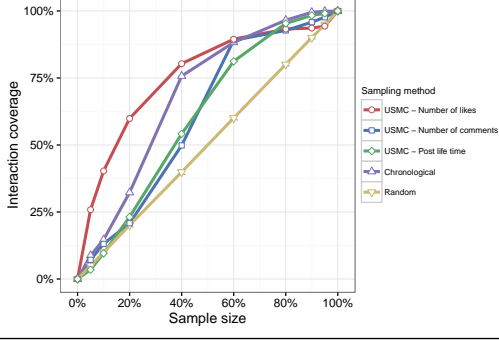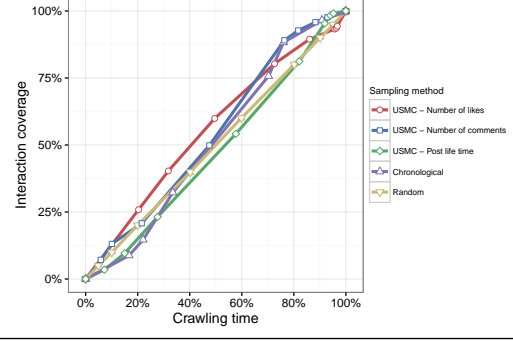

Continued on next page

**S1 Fig.** The effect of ranking with regards to number of interactions of the sample size *left figure* and crawling time *right figure* from a subset of a page's posts ranked by *number of comments*, *number of likes*, *post lifetime* and a *random sample*. The *random sample* shows the median and standard deviation for 100 runs.

5720973755

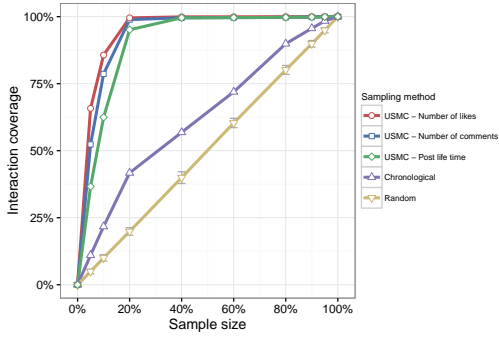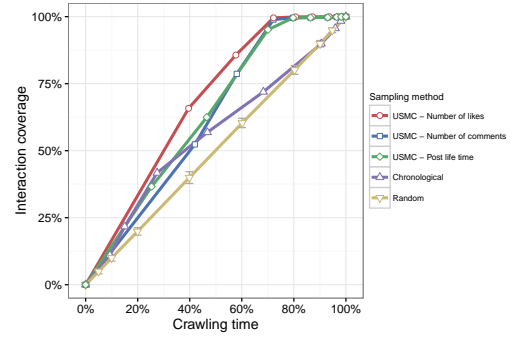

193072760827

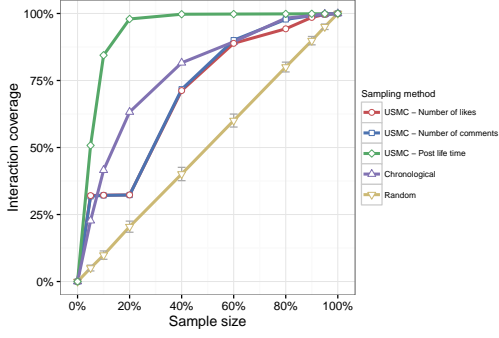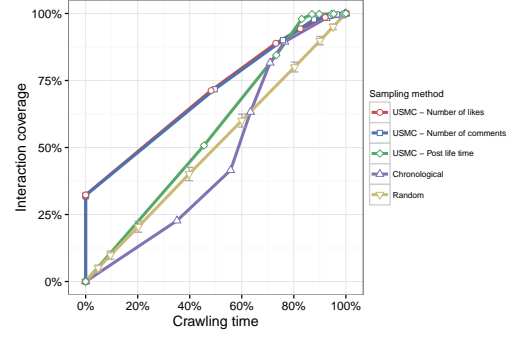

11055104471

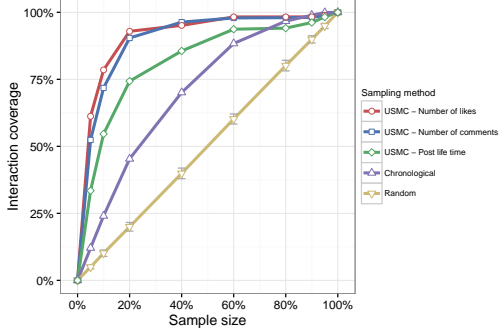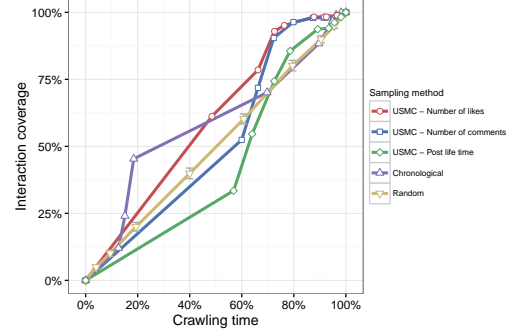

125787337496837

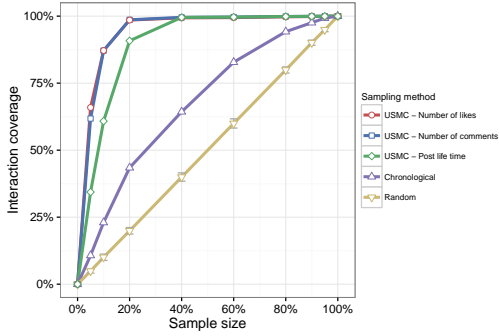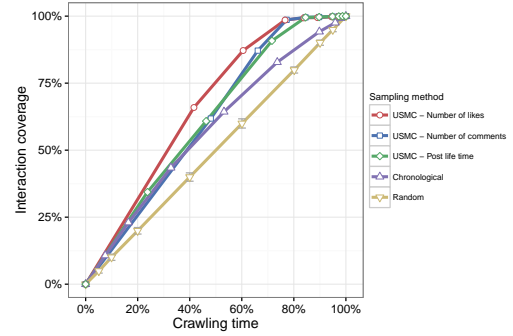

6651543066

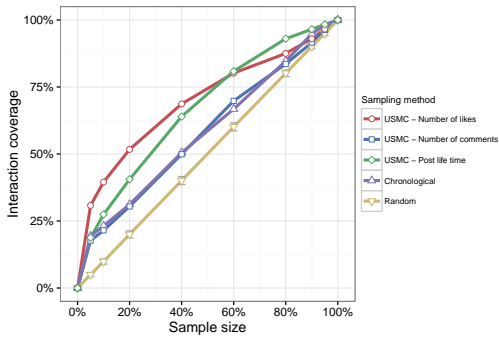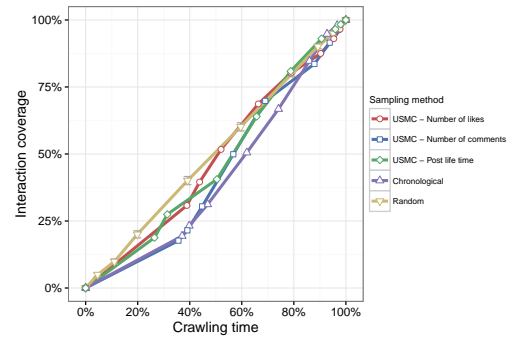

Continued on next page

**S1 Fig.** The effect of ranking with regards to number of interactions of the sample size *left figure* and crawling time *right figure* from a subset of a page's posts ranked by *number of comments*, *number of likes*, *post lifetime* and a *random sample*. The *random sample* shows the median and standard deviation for 100 runs.

7568536355

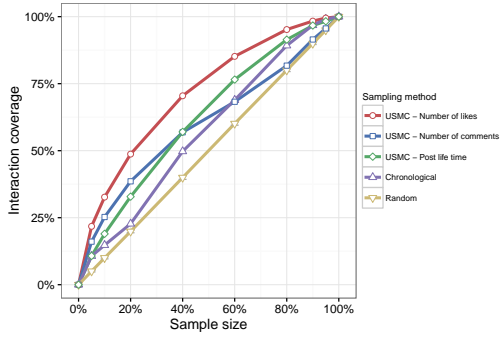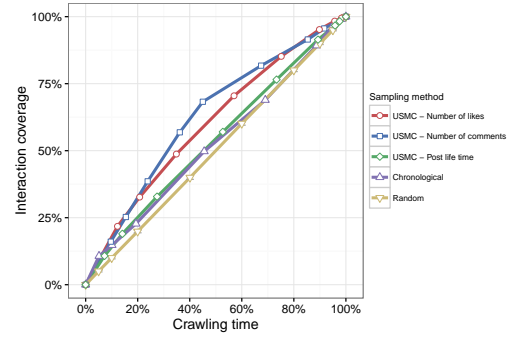

344267635599110

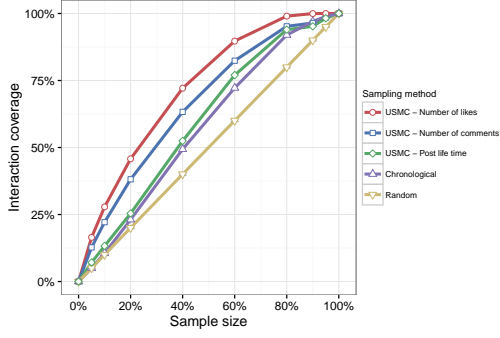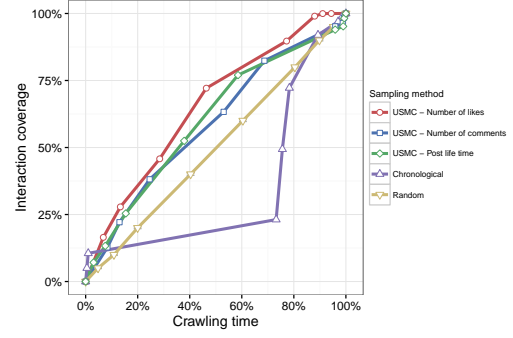

7630216751

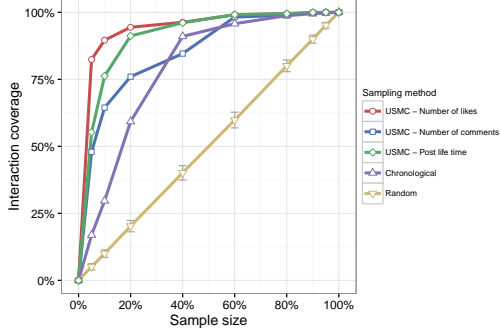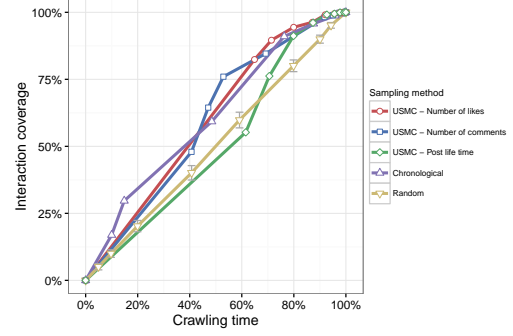

104375499654834

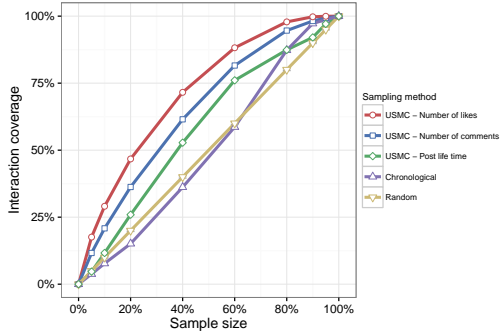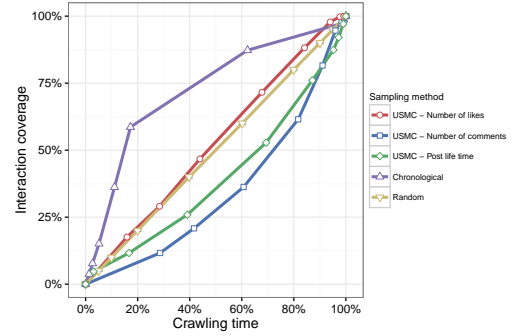

55139614218

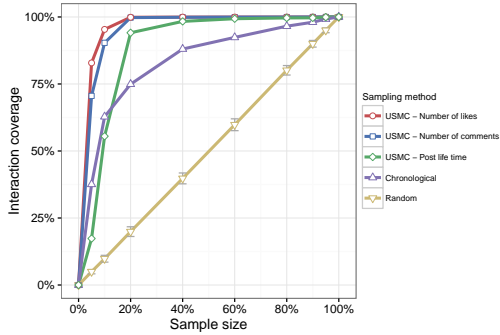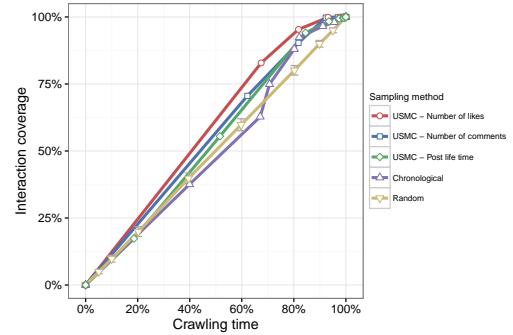

Continued on next page

**S1 Fig.** The effect of ranking with regards to number of interactions of the sample size *left figure* and crawling time *right figure* from a subset of a page's posts ranked by *number of comments*, *number of likes*, *post lifetime* and a *random sample*. The *random sample* shows the median and standard deviation for 100 runs.

7511533723

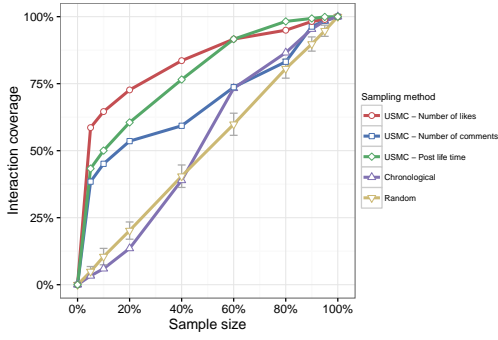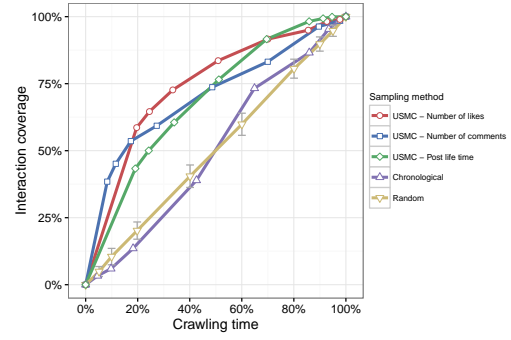

8605796091

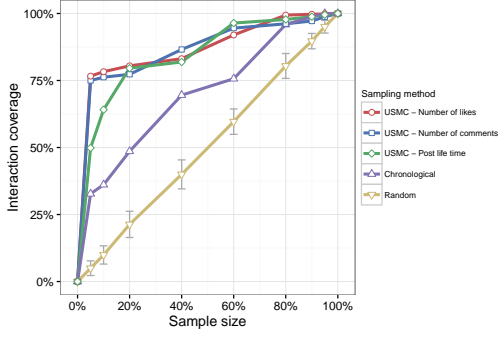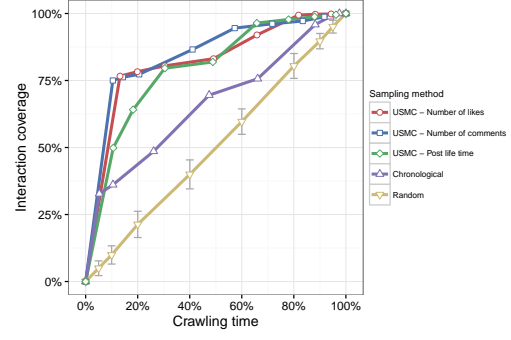

1064321755

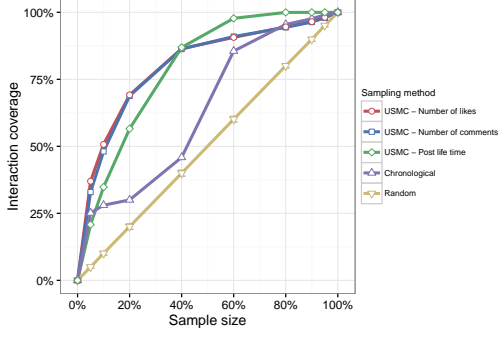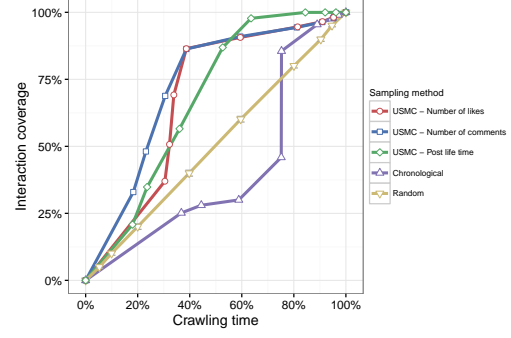

107214895991663

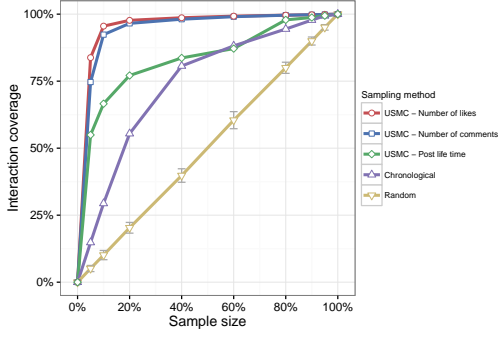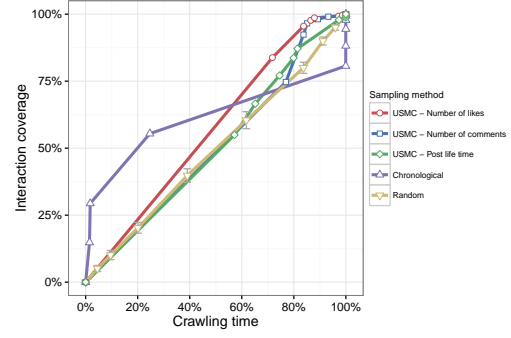

7558451780

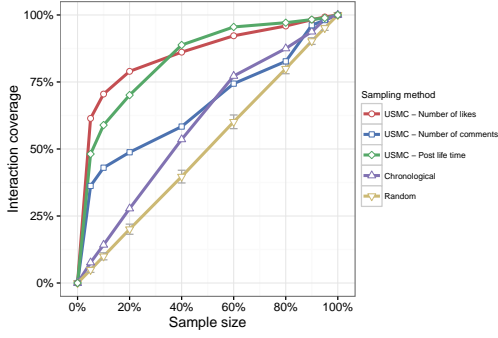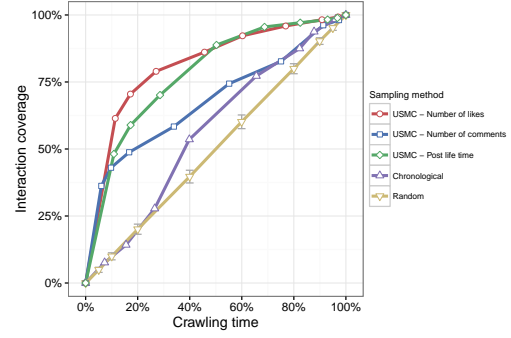

Continued on next page

**S1 Fig.** The effect of ranking with regards to number of interactions of the sample size *left figure* and crawling time *right figure* from a subset of a page's posts ranked by *number of comments*, *number of likes*, *post lifetime* and a *random sample*. The *random sample* shows the median and standard deviation for 100 runs.

26035834884

135922659784530

97212224368

18343191100

20950654496

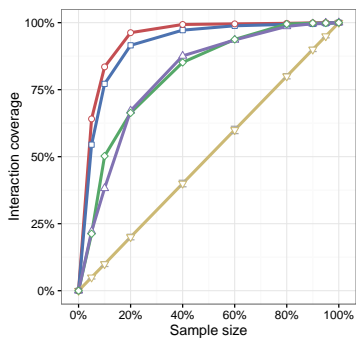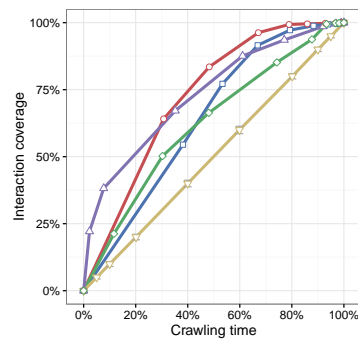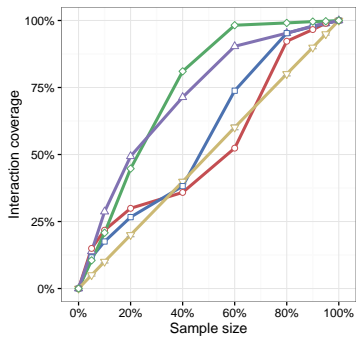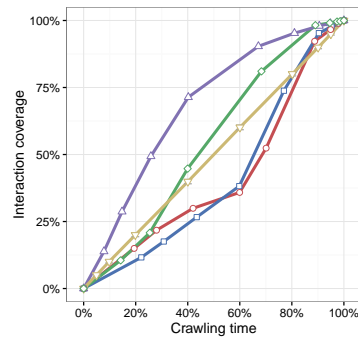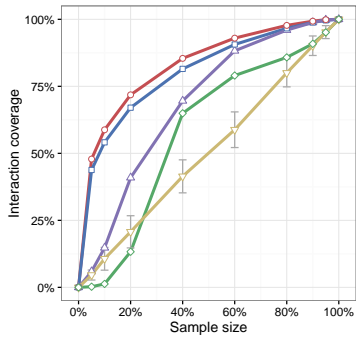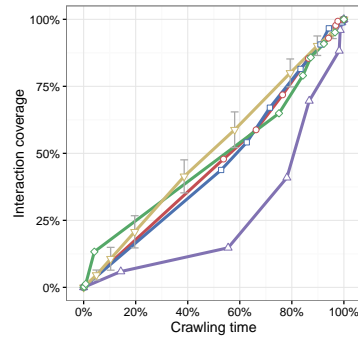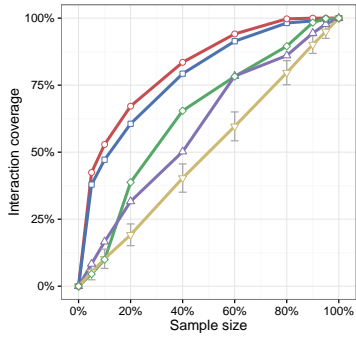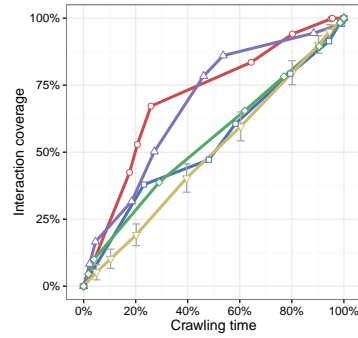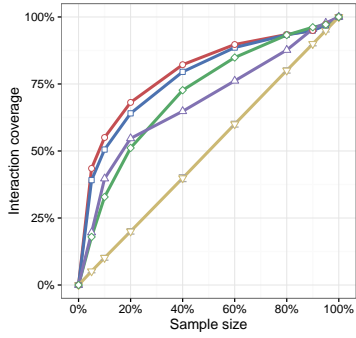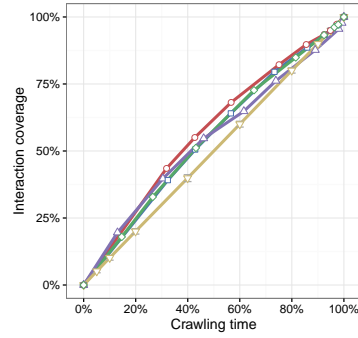

Continued on next page

**S1 Fig.** The effect of ranking with regards to number of interactions of the sample size *left figure* and crawling time *right figure* from a subset of a page's posts ranked by *number of comments*, *number of likes*, *post lifetime* and a *random sample*. The *random sample* shows the median and standard deviation for 100 runs.

6187954123

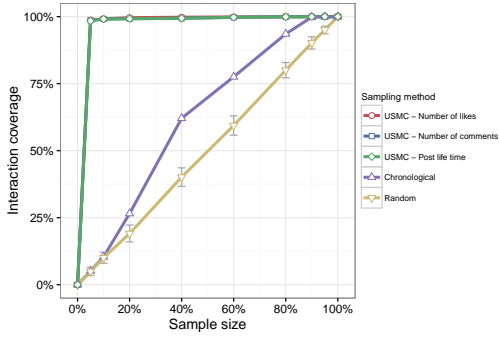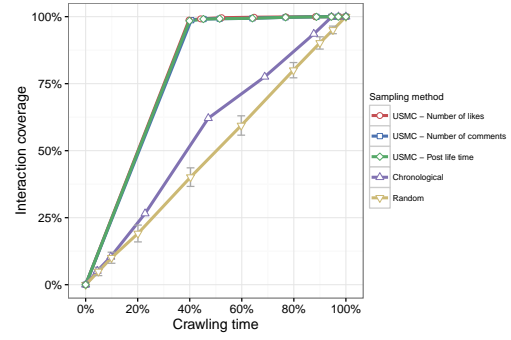

129370207168068

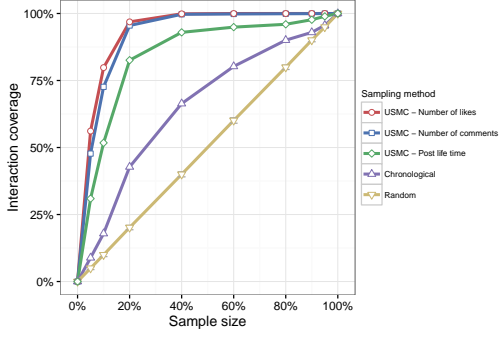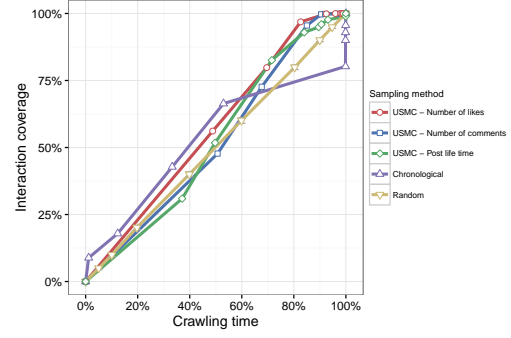

199299723534097

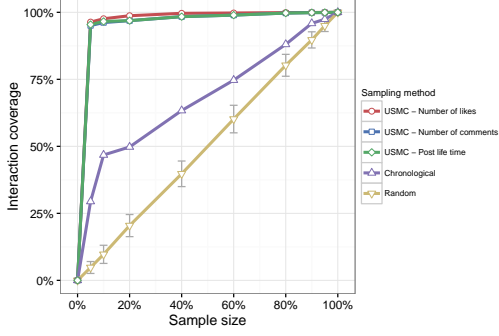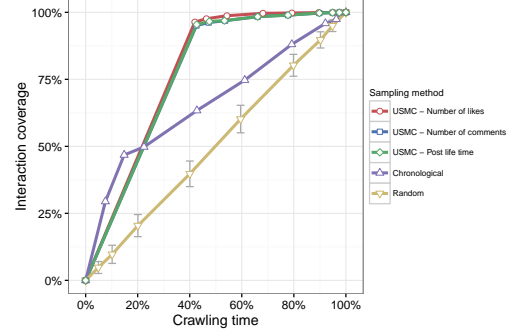

5630135837

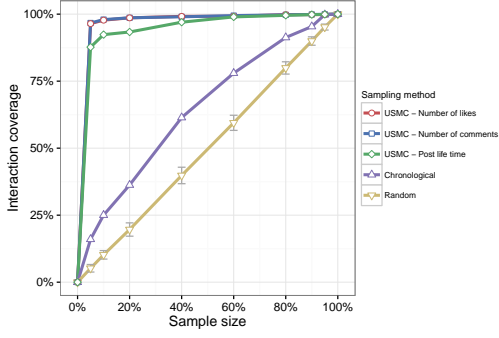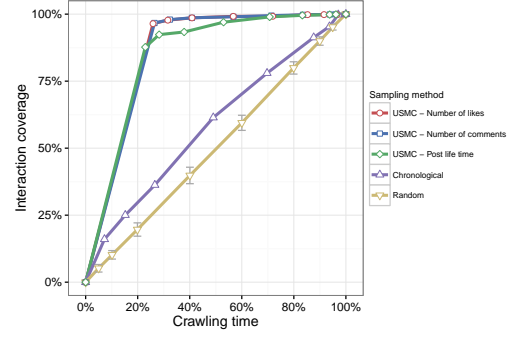

13652355666

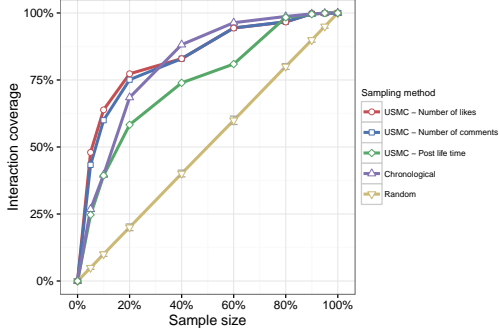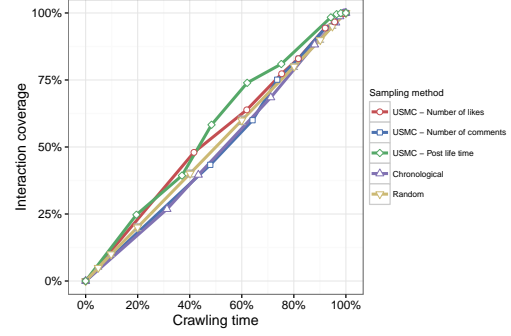

Continued on next page

**S1 Fig.** The effect of ranking with regards to number of interactions of the sample size *left figure* and crawling time *right figure* from a subset of a page's posts ranked by *number of comments*, *number of likes*, *post lifetime* and a *random sample*. The *random sample* shows the median and standard deviation for 100 runs.

8934429638

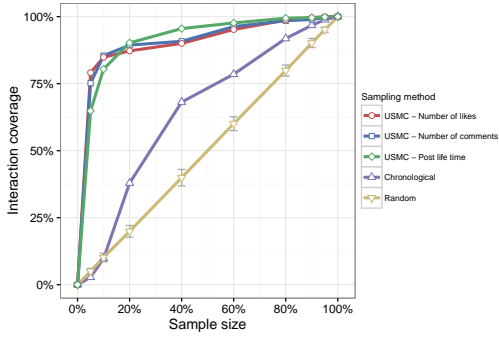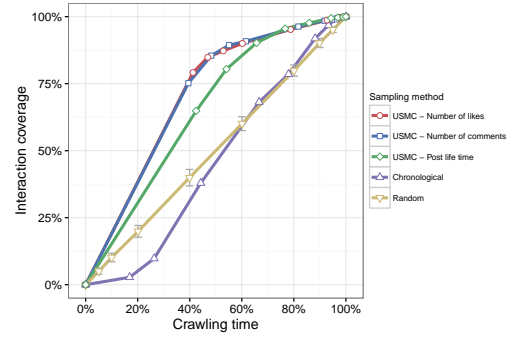

32421823940

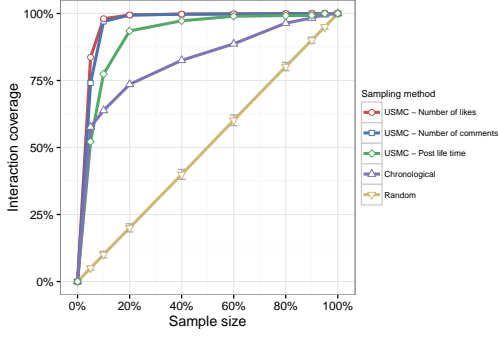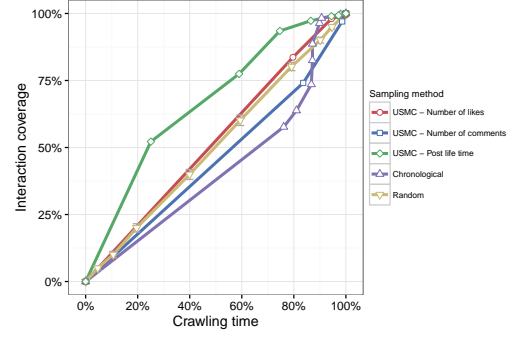

8340223883

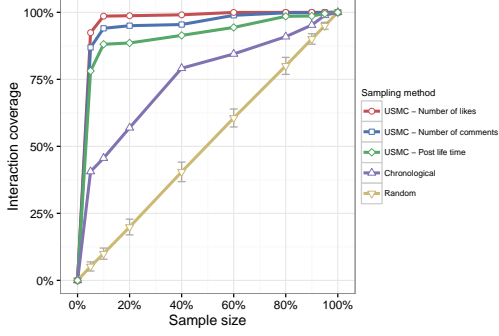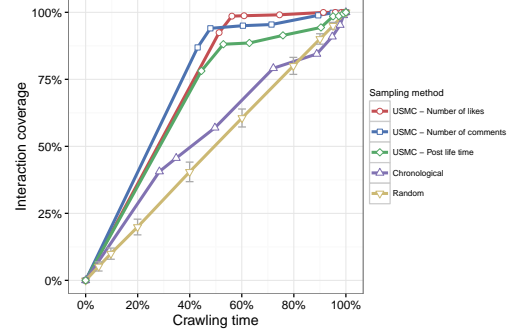

317928348241564

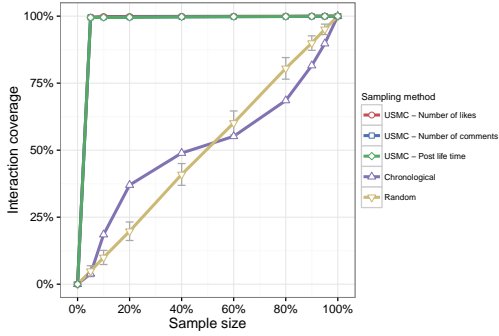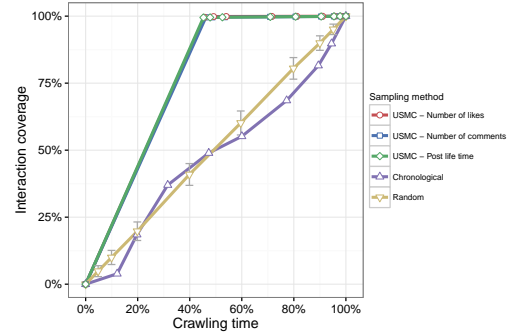

8304333127

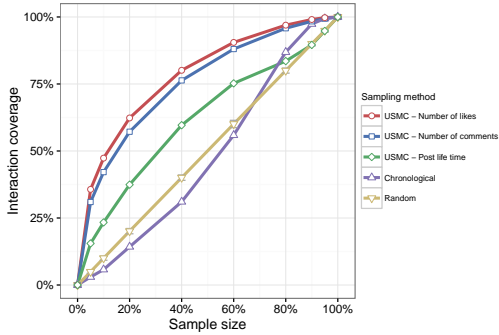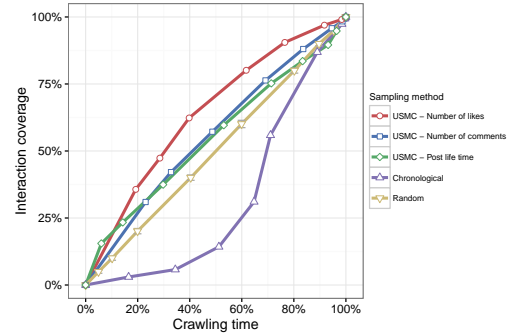

Continued on next page

**S1 Fig.** The effect of ranking with regards to number of interactions of the sample size *left figure* and crawling time *right figure* from a subset of a page's posts ranked by *number of comments*, *number of likes*, *post lifetime* and a *random sample*. The *random sample* shows the median and standard deviation for 100 runs.



6399067073

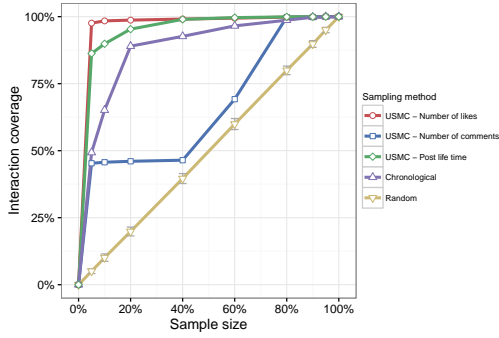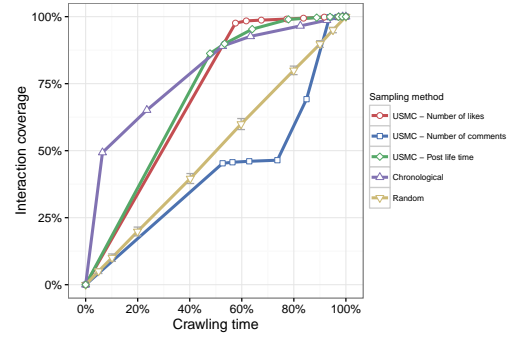

113408673932

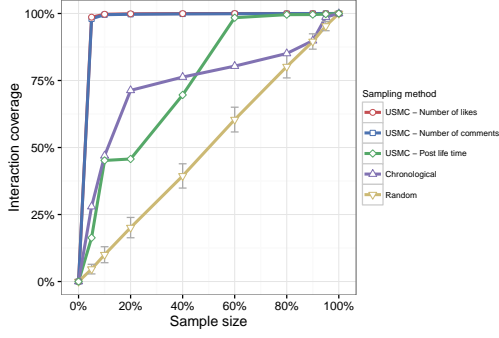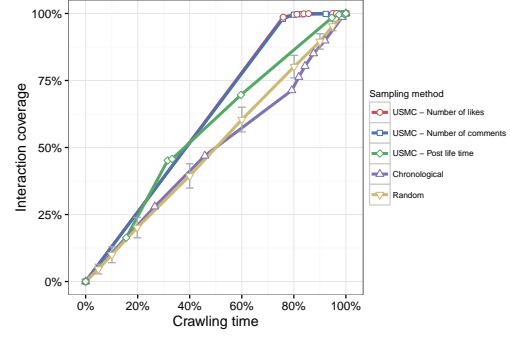

8798180154

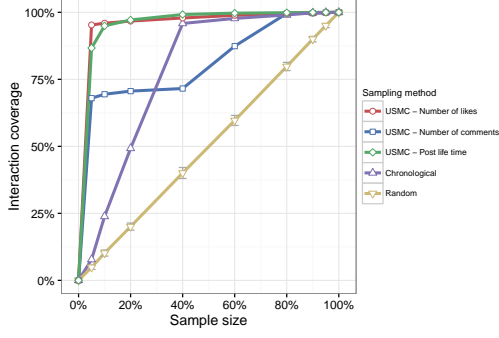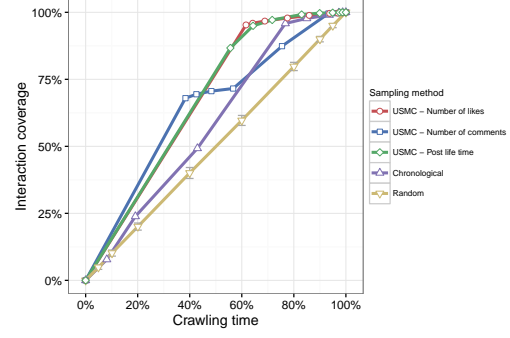

192169930808550

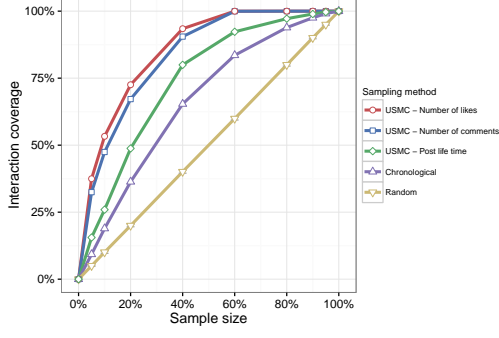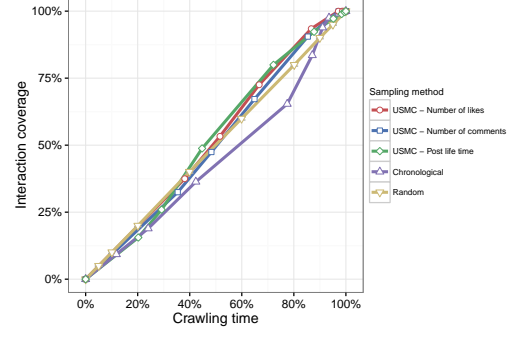

14892757589

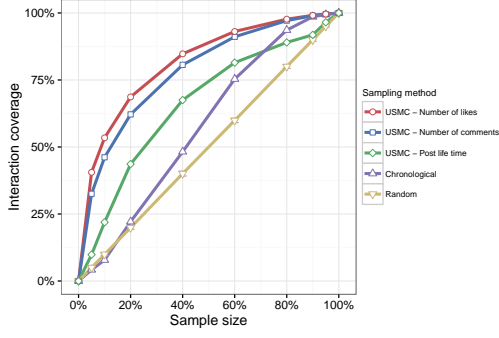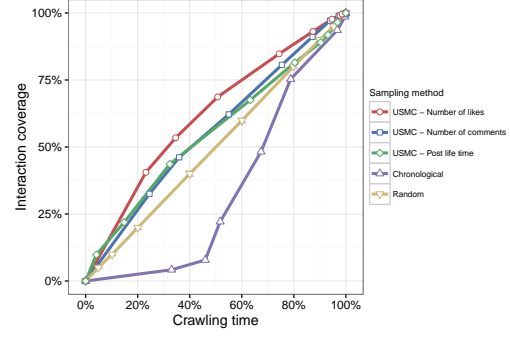

Continued on next page

**S1 Fig.** The effect of ranking with regards to number of interactions of the sample size *left figure* and crawling time *right figure* from a subset of a page's posts ranked by *number of comments*, *number of likes*, *post lifetime* and a *random sample*. The *random sample* shows the median and standard deviation for 100 runs.

5676133521

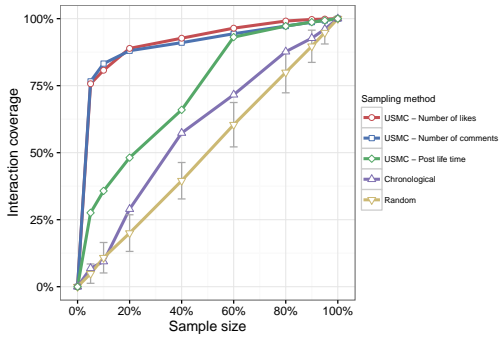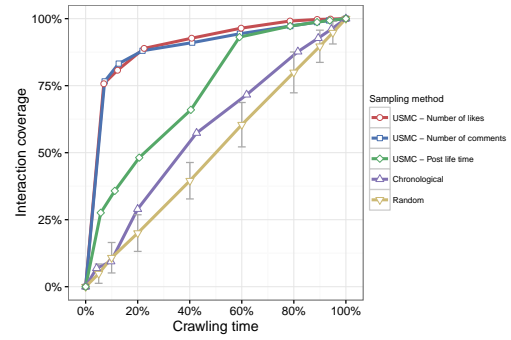

254620607914006

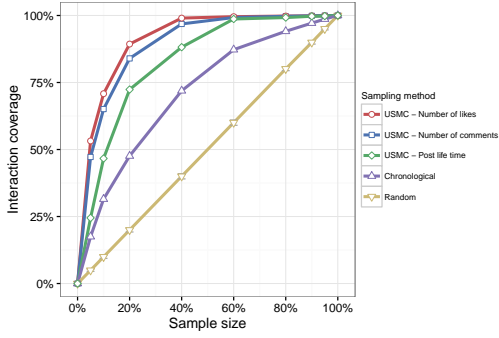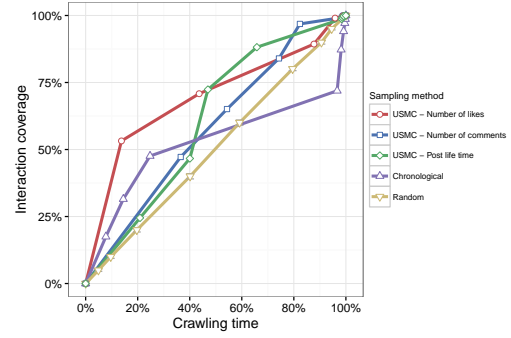

7144906559

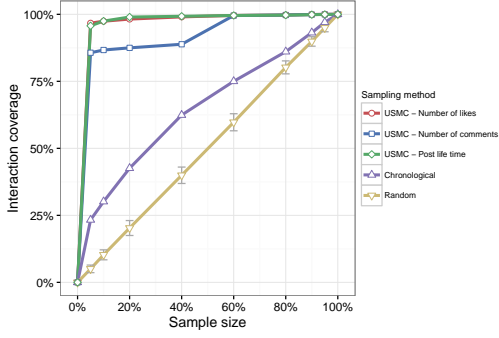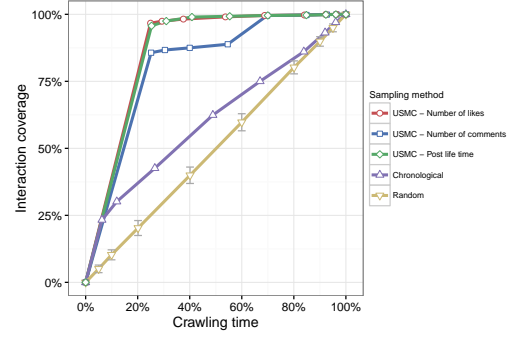

5485793674

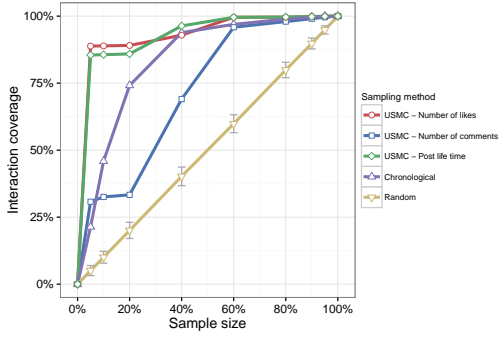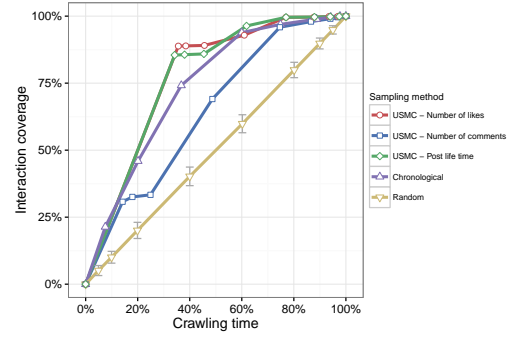

5281959998

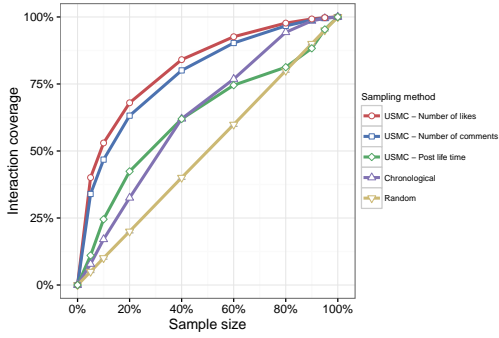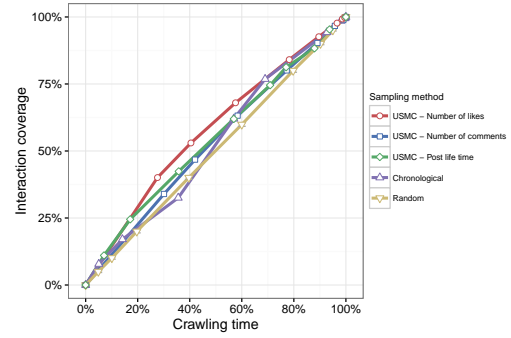

Continued on next page

**S1 Fig.** The effect of ranking with regards to number of interactions of the sample size *left figure* and crawling time *right figure* from a subset of a page's posts ranked by *number of comments*, *number of likes*, *post lifetime* and a *random sample*. The *random sample* shows the median and standard deviation for 100 runs.

47360808996

42940254353

133279166727577

178463258907212

6092929747

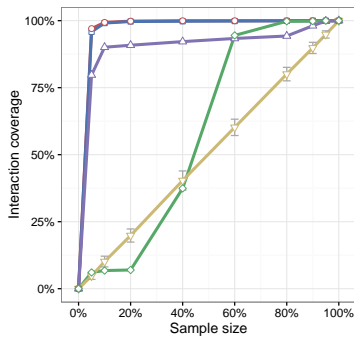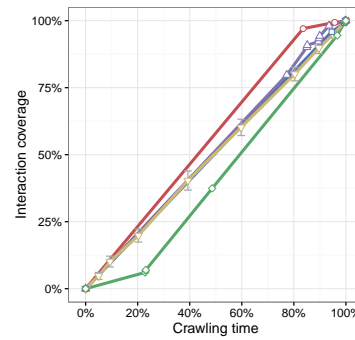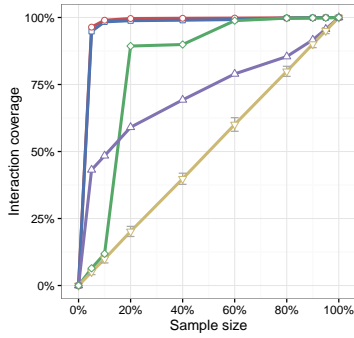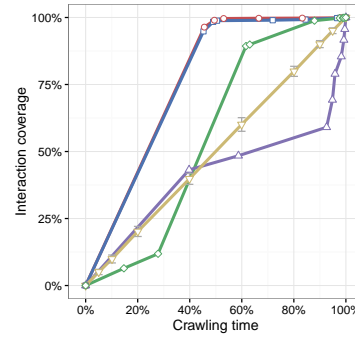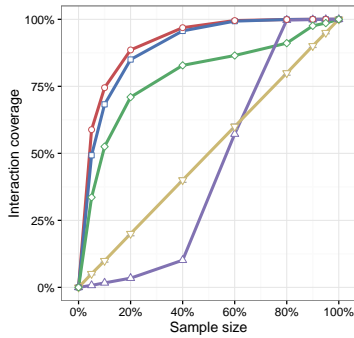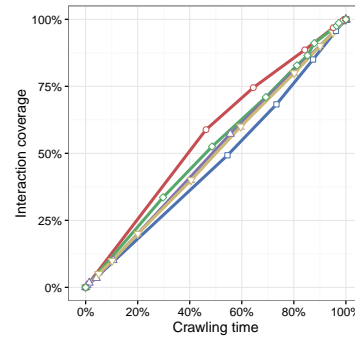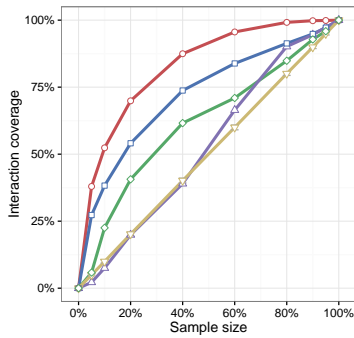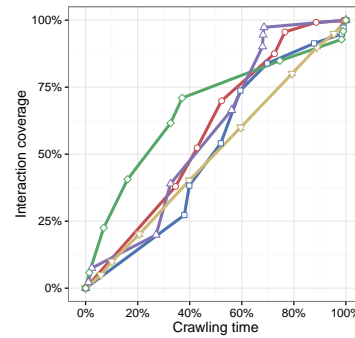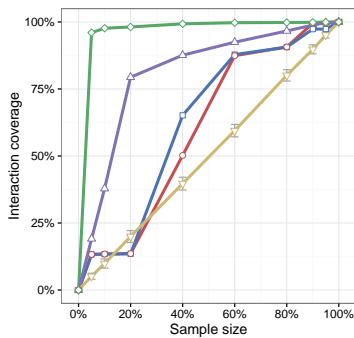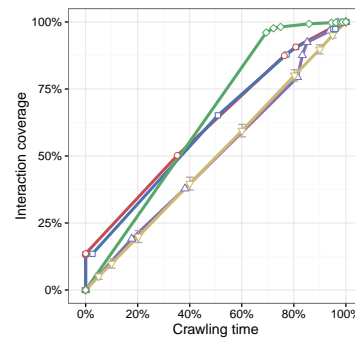

Continued on next page

**S1 Fig.** The effect of ranking with regards to number of interactions of the sample size *left figure* and crawling time *right figure* from a subset of a page's posts ranked by *number of comments*, *number of likes*, *post lifetime* and a *random sample*. The *random sample* shows the median and standard deviation for 100 runs.

9418270899

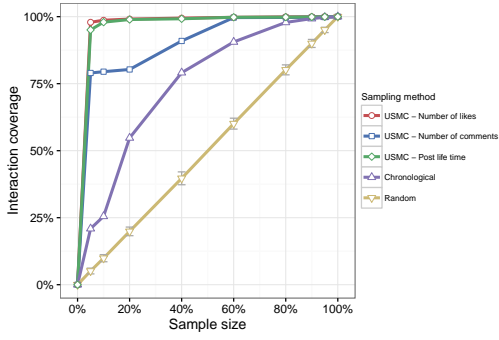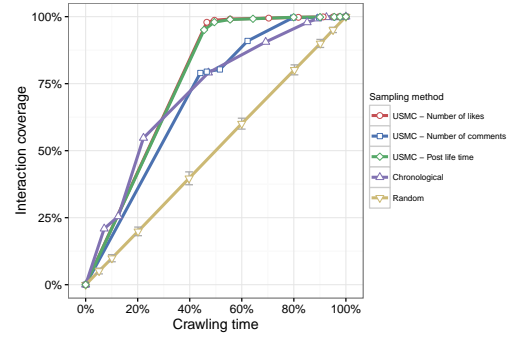

280920811923248

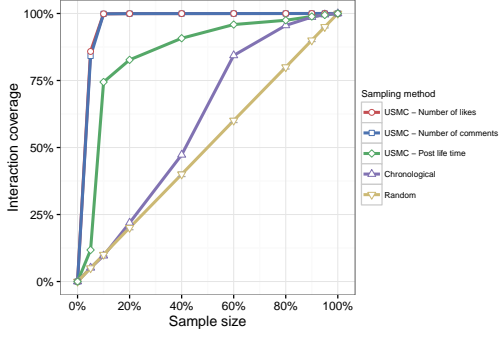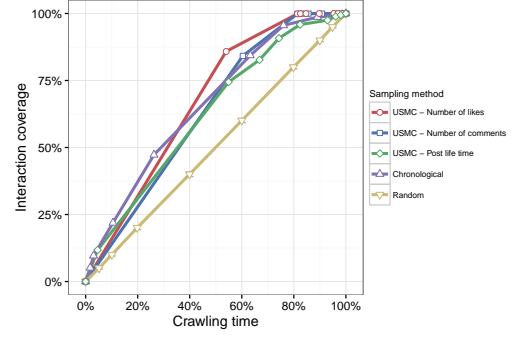

9748634303

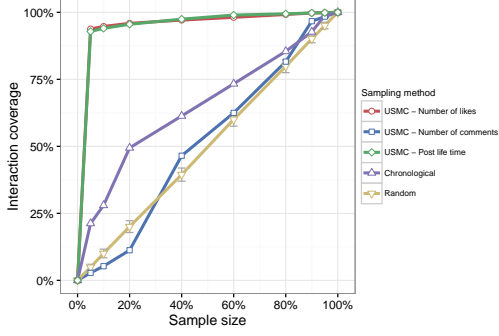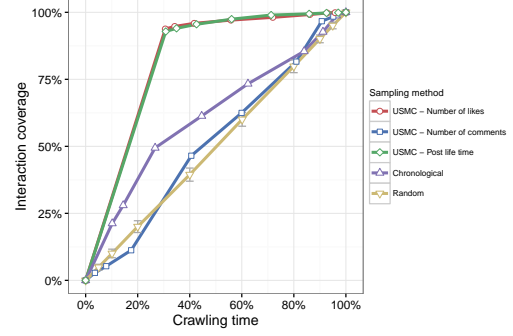

7037526514

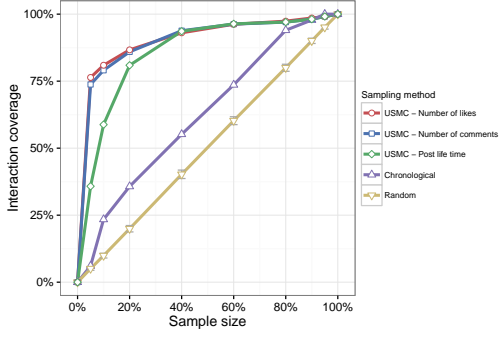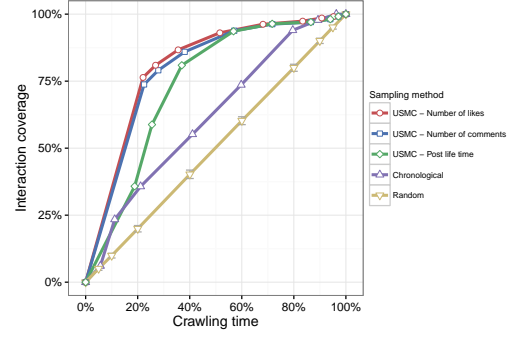

18801397386

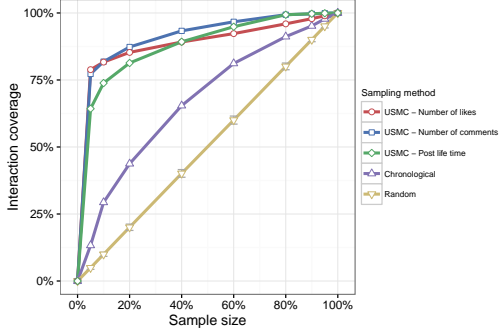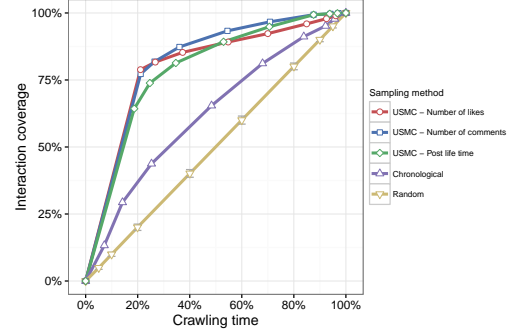

Continued on next page

**S1 Fig.** The effect of ranking with regards to number of interactions of the sample size *left figure* and crawling time *right figure* from a subset of a page's posts ranked by *number of comments*, *number of likes*, *post lifetime* and a *random sample*. The *random sample* shows the median and standard deviation for 100 runs.

8389383510

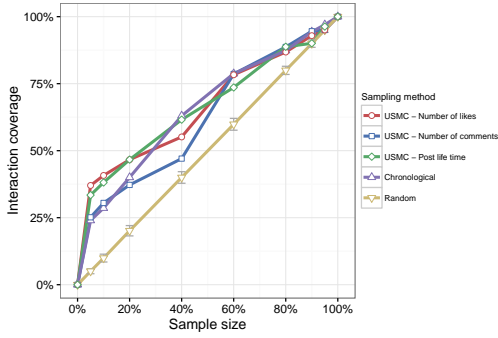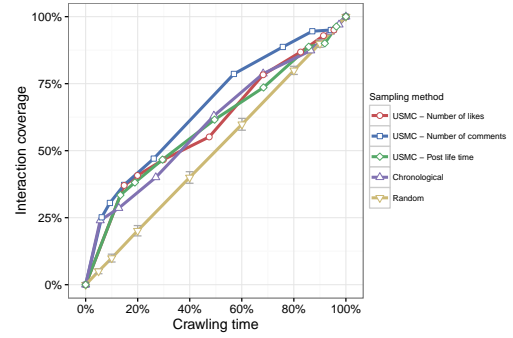

8576093908

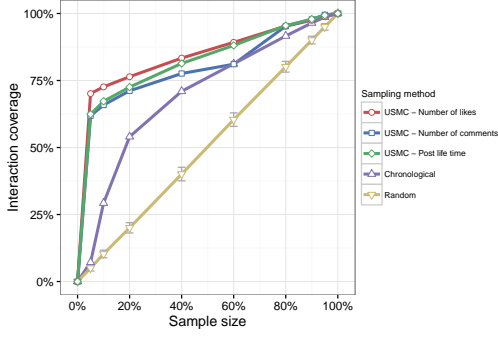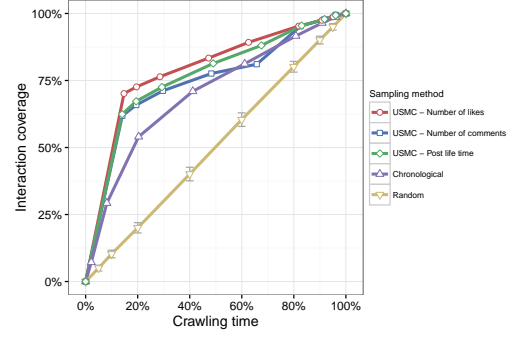

8210451787

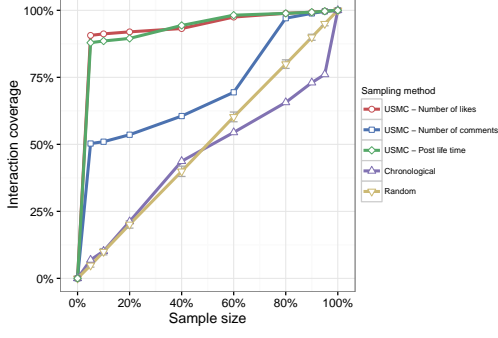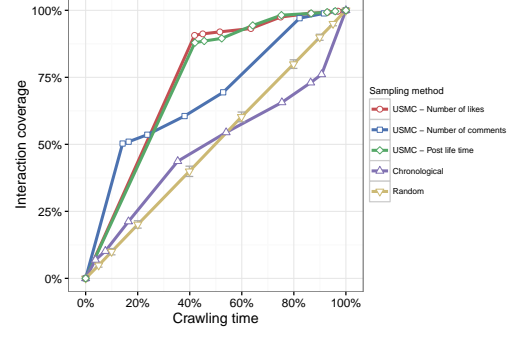

5550296508

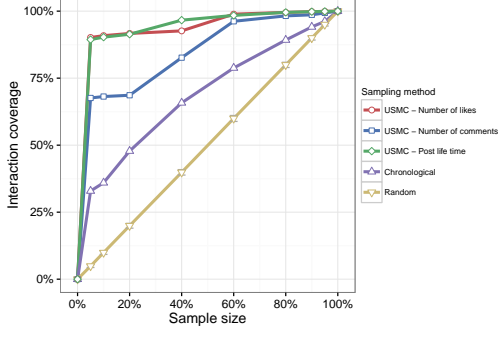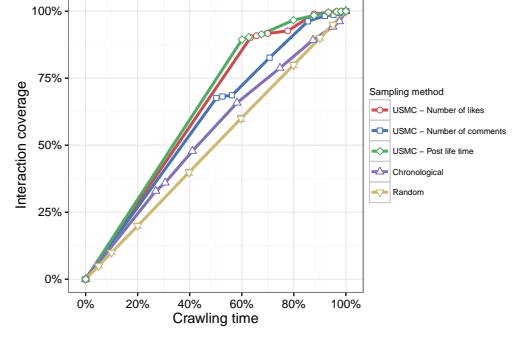

7126051465

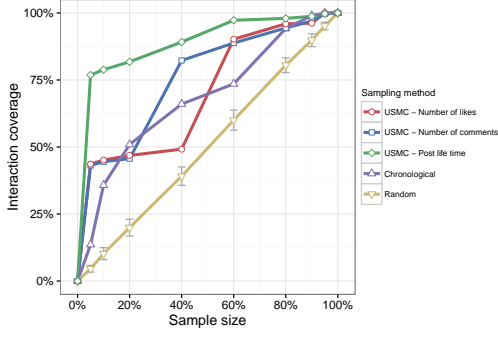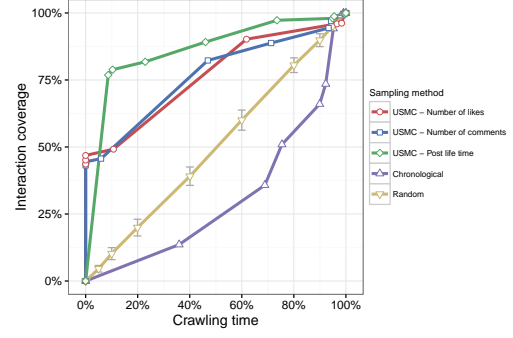

**S1 Fig.** The effect of ranking with regards to number of interactions of the sample size *left figure* and crawling time *right figure* from a subset of a page's posts ranked by *number of comments*, *number of likes*, *post lifetime* and a *random sample*. The *random sample* shows the median and standard deviation for 100 runs.

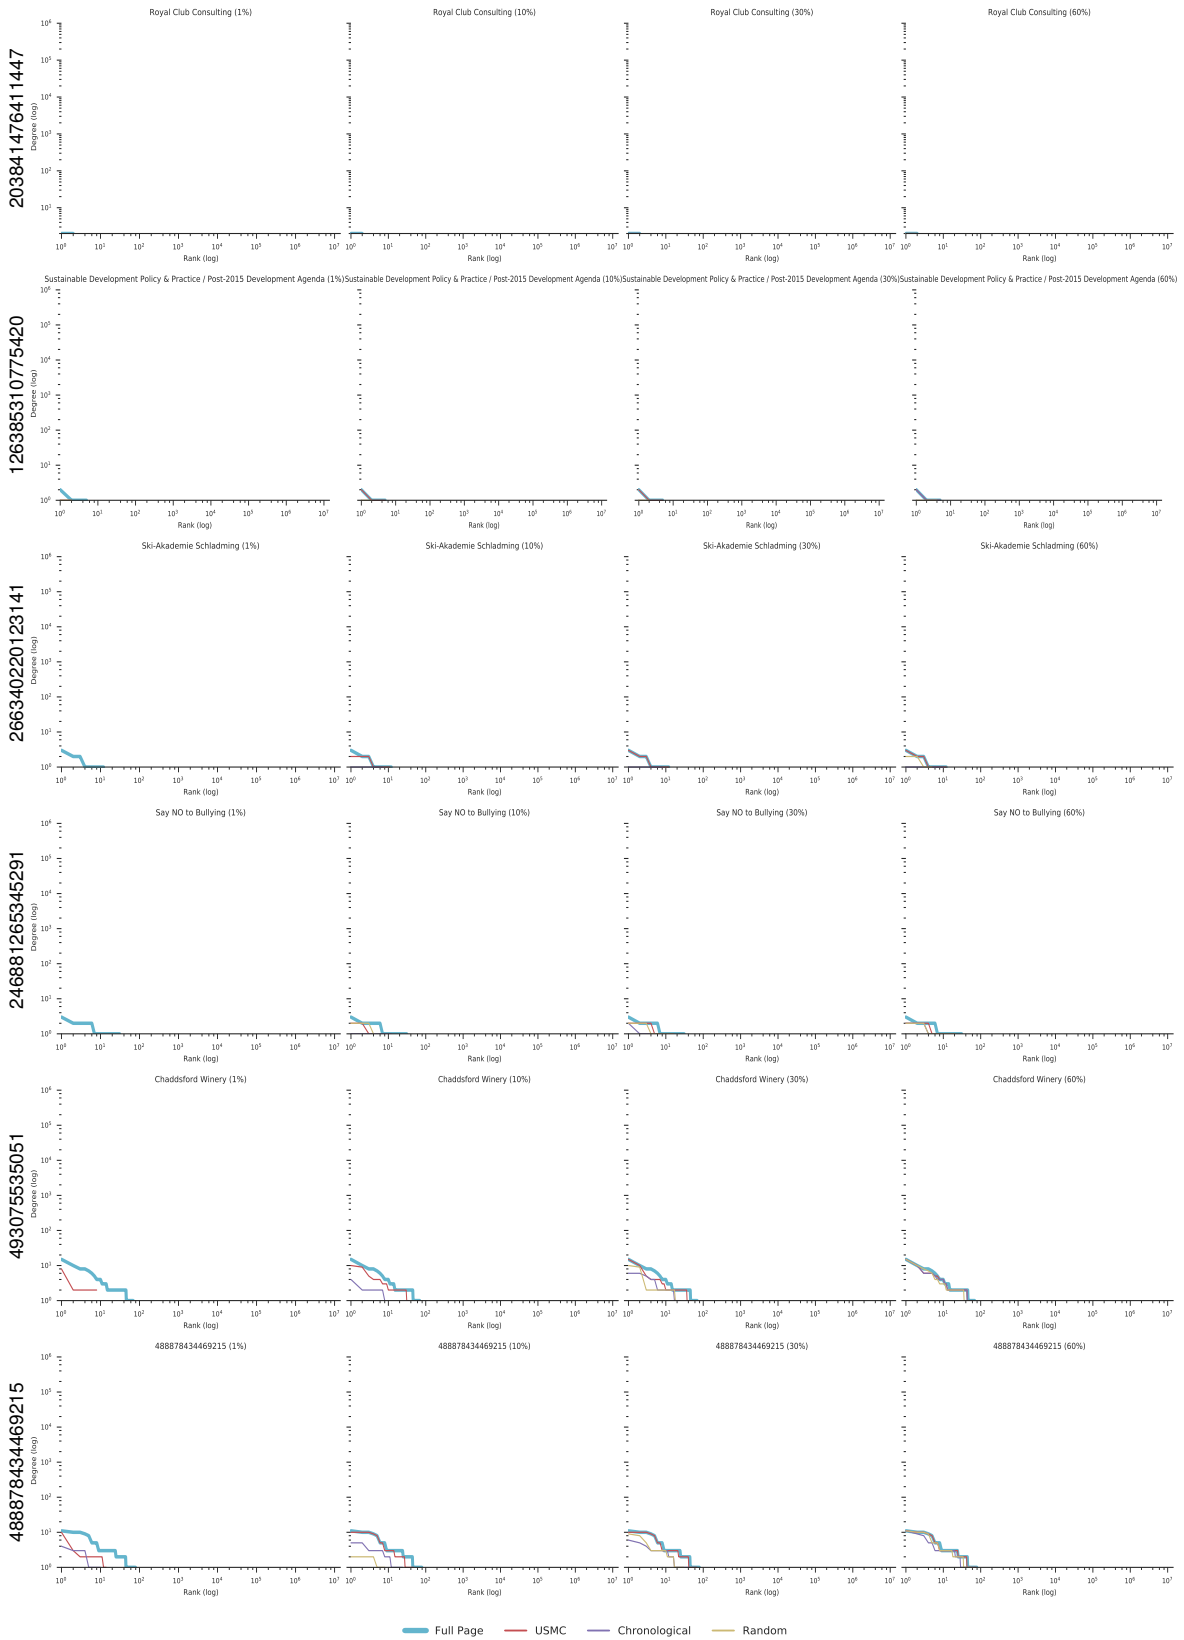

Continued on next page

**S2 Fig.** Degree distribution for the analysed Facebook pages. Each column represents a sample size (1%, 10%, 30%, and 60%), and each row represents a page.

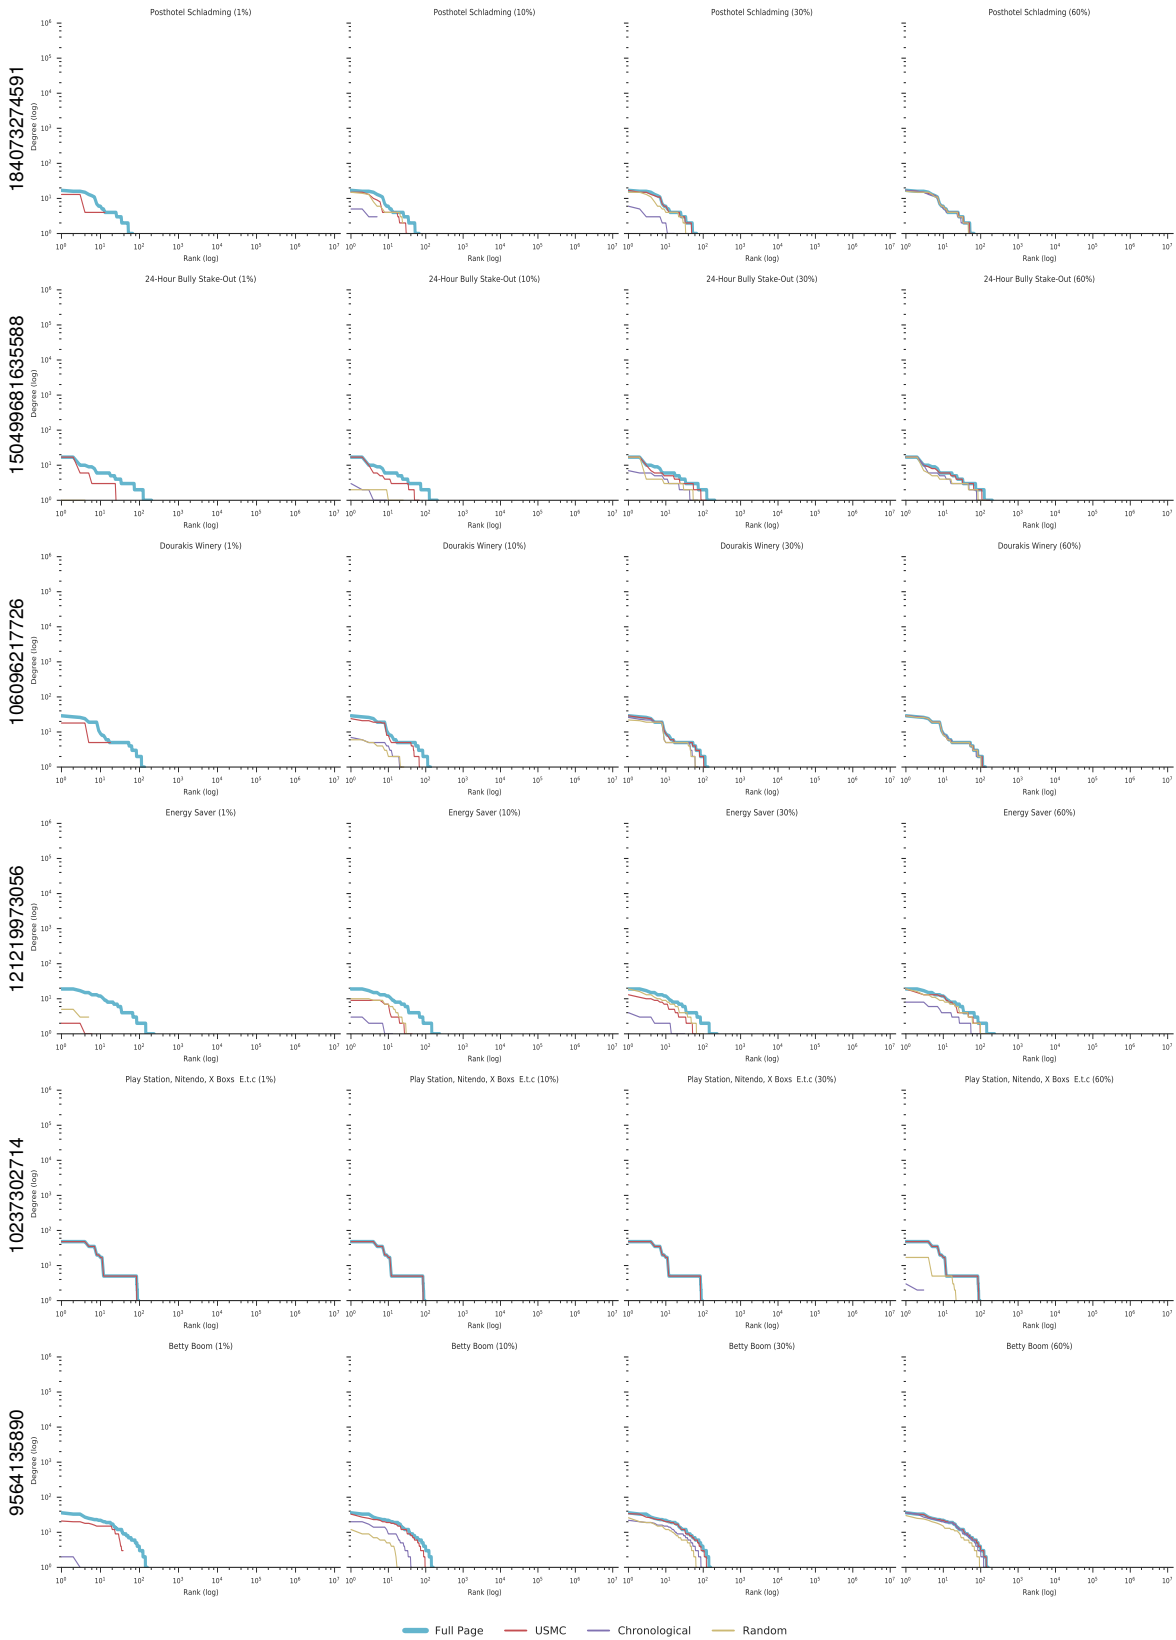

Continued on next page

**S2 Fig.** Degree distribution for the analysed Facebook pages. Each column represents a sample size (1%, 10%, 30%, and 60%), and each row represents a page.

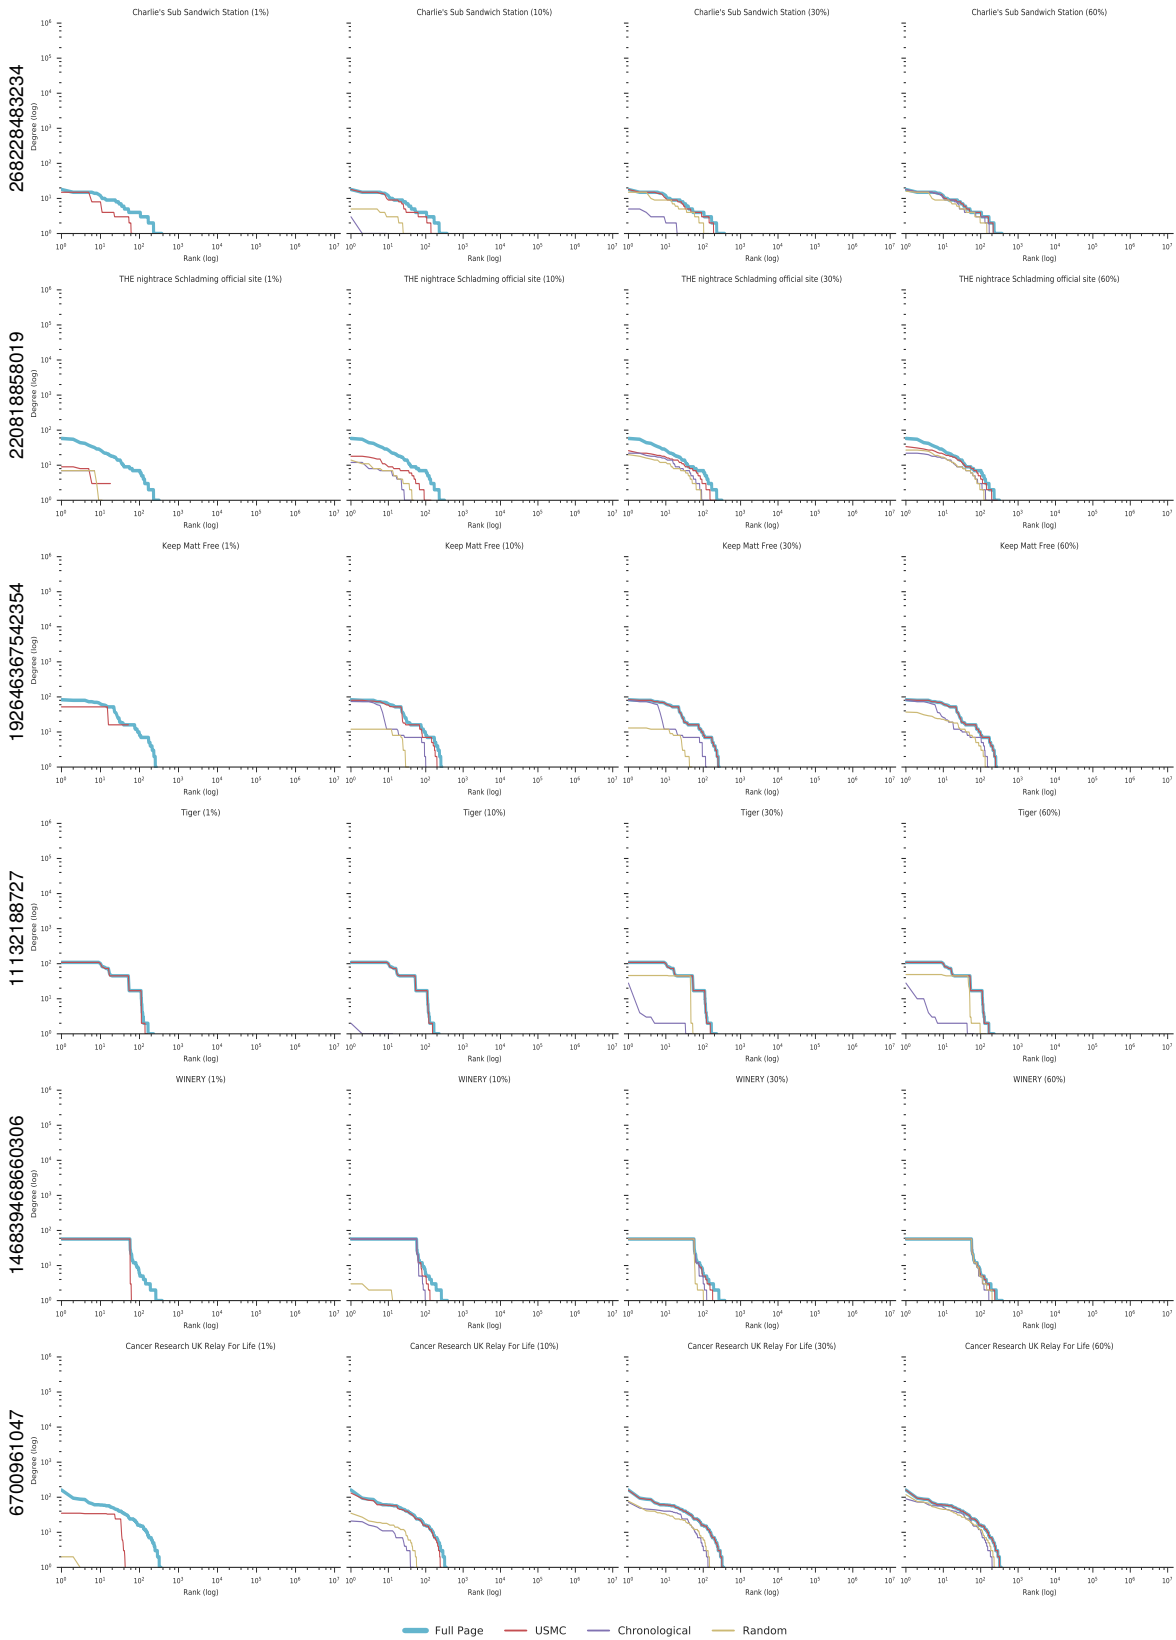

Continued on next page

**S2 Fig.** Degree distribution for the analysed Facebook pages. Each column represents a sample size (1%, 10%, 30%, and 60%), and each row represents a page.



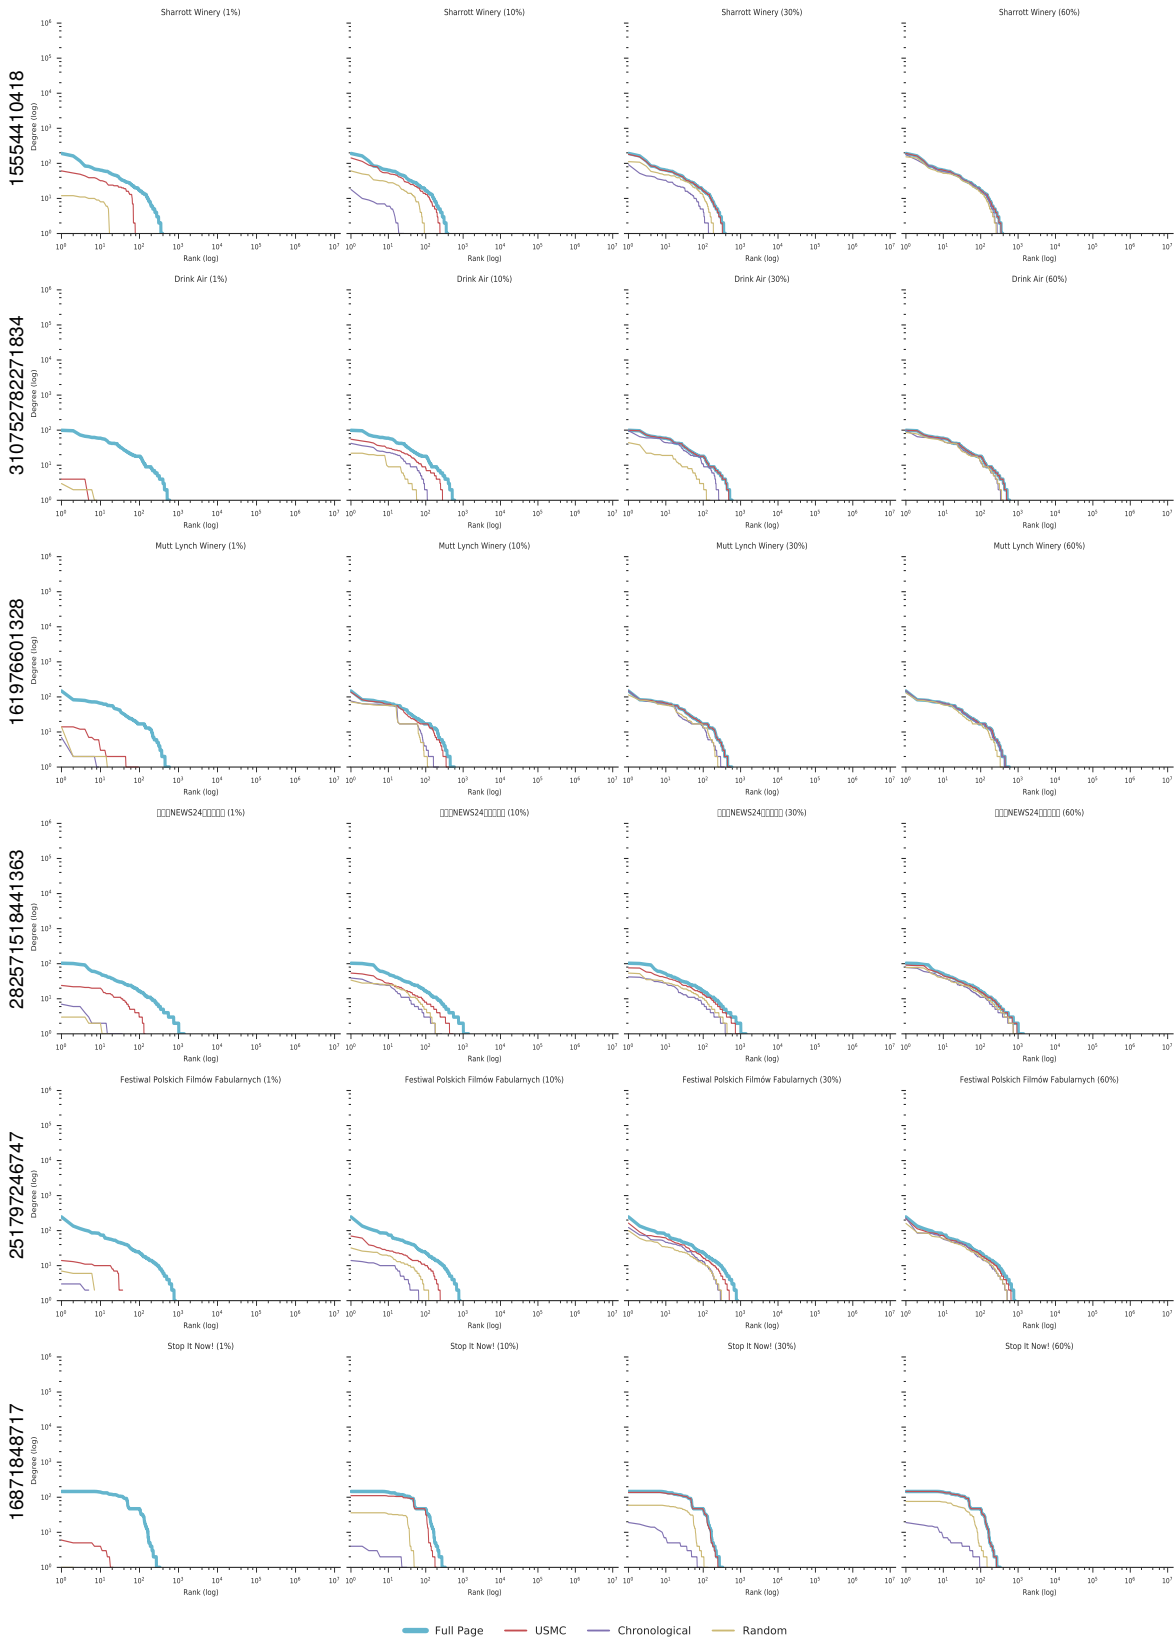

Continued on next page

**S2 Fig.** Degree distribution for the analysed Facebook pages. Each column represents a sample size (1%, 10%, 30%, and 60%), and each row represents a page.

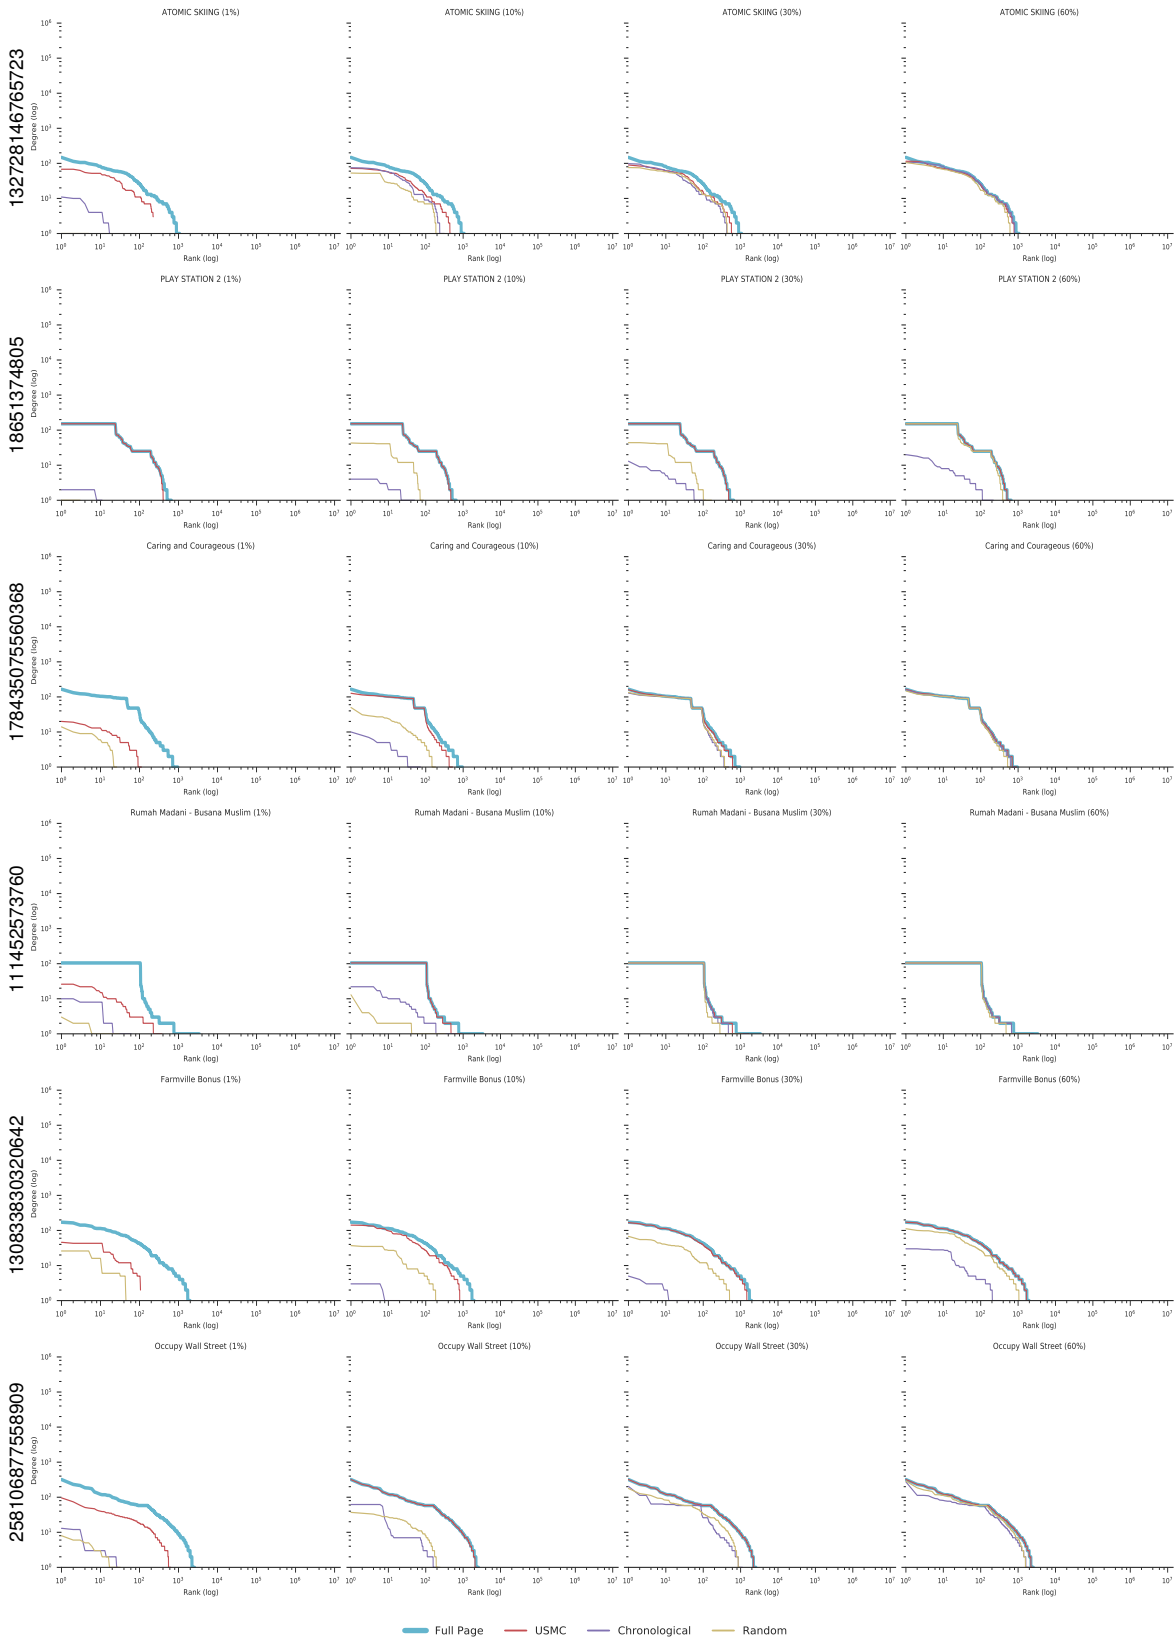

Continued on next page

**S2 Fig.** Degree distribution for the analysed Facebook pages. Each column represents a sample size (1%, 10%, 30%, and 60%), and each row represents a page.

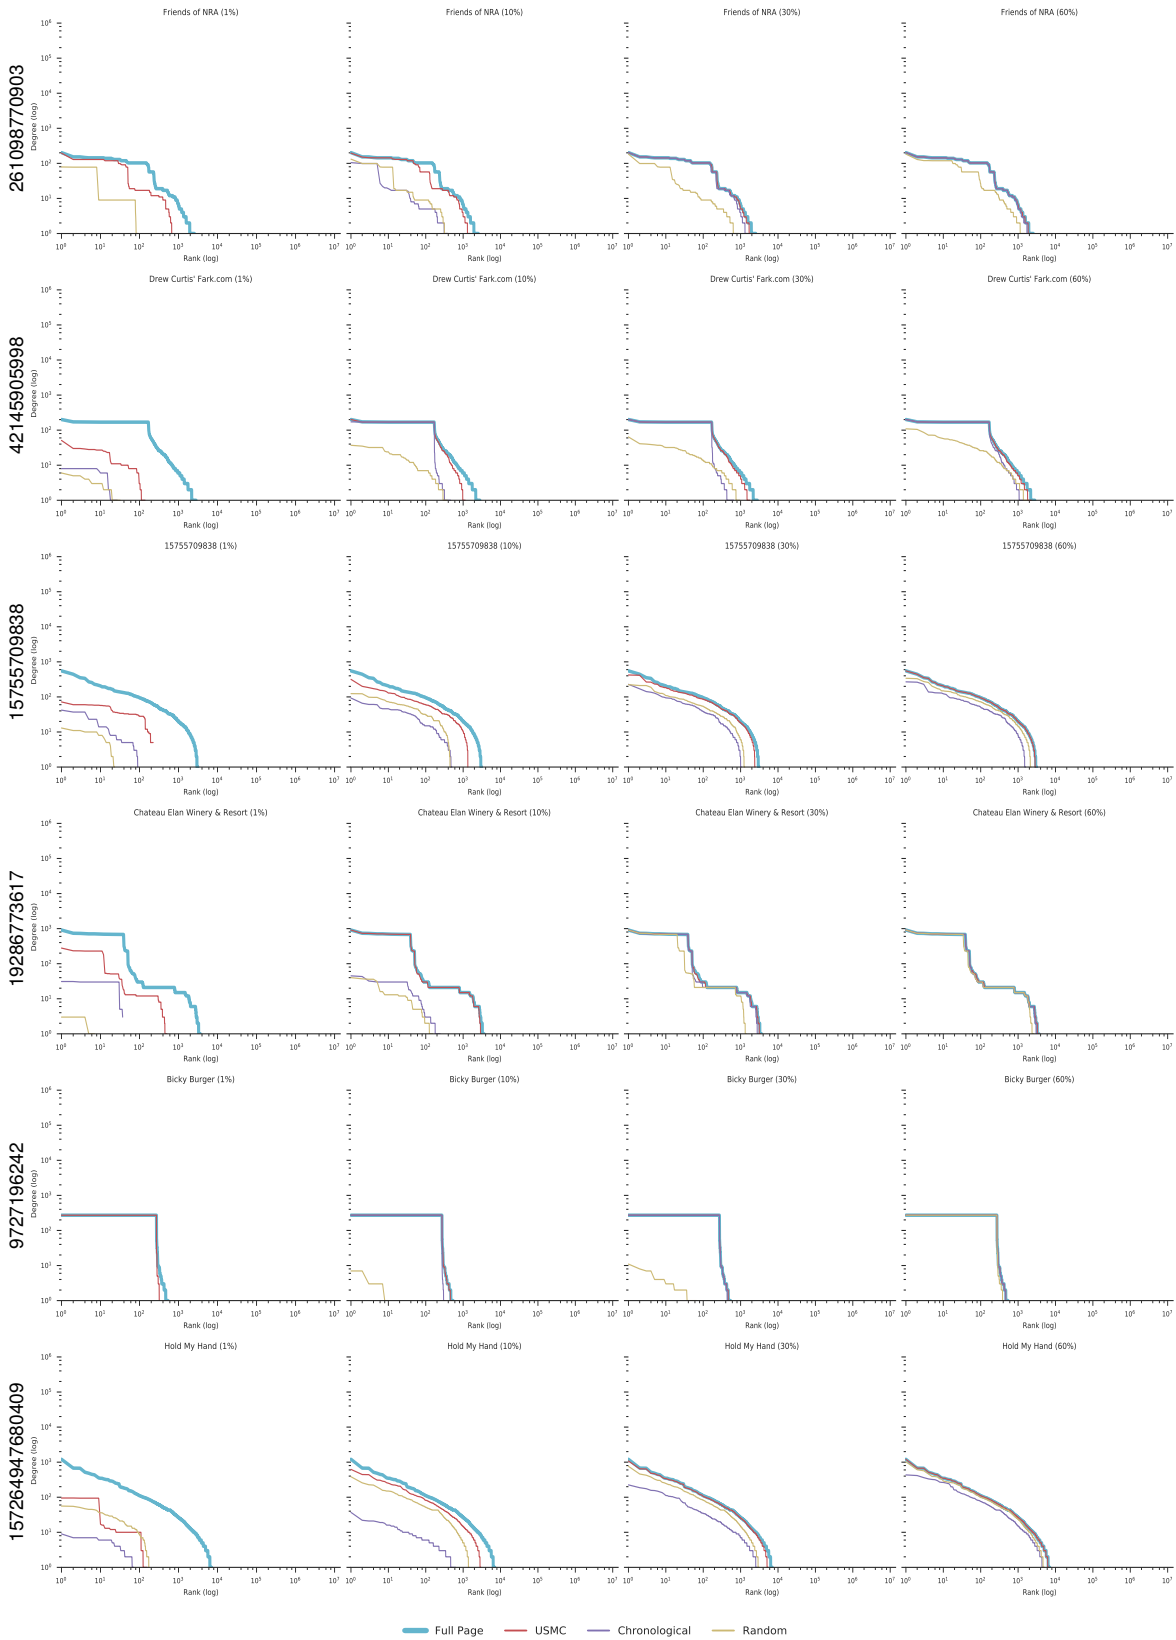

Continued on next page

**S2 Fig.** Degree distribution for the analysed Facebook pages. Each column represents a sample size (1%, 10%, 30%, and 60%), and each row represents a page.

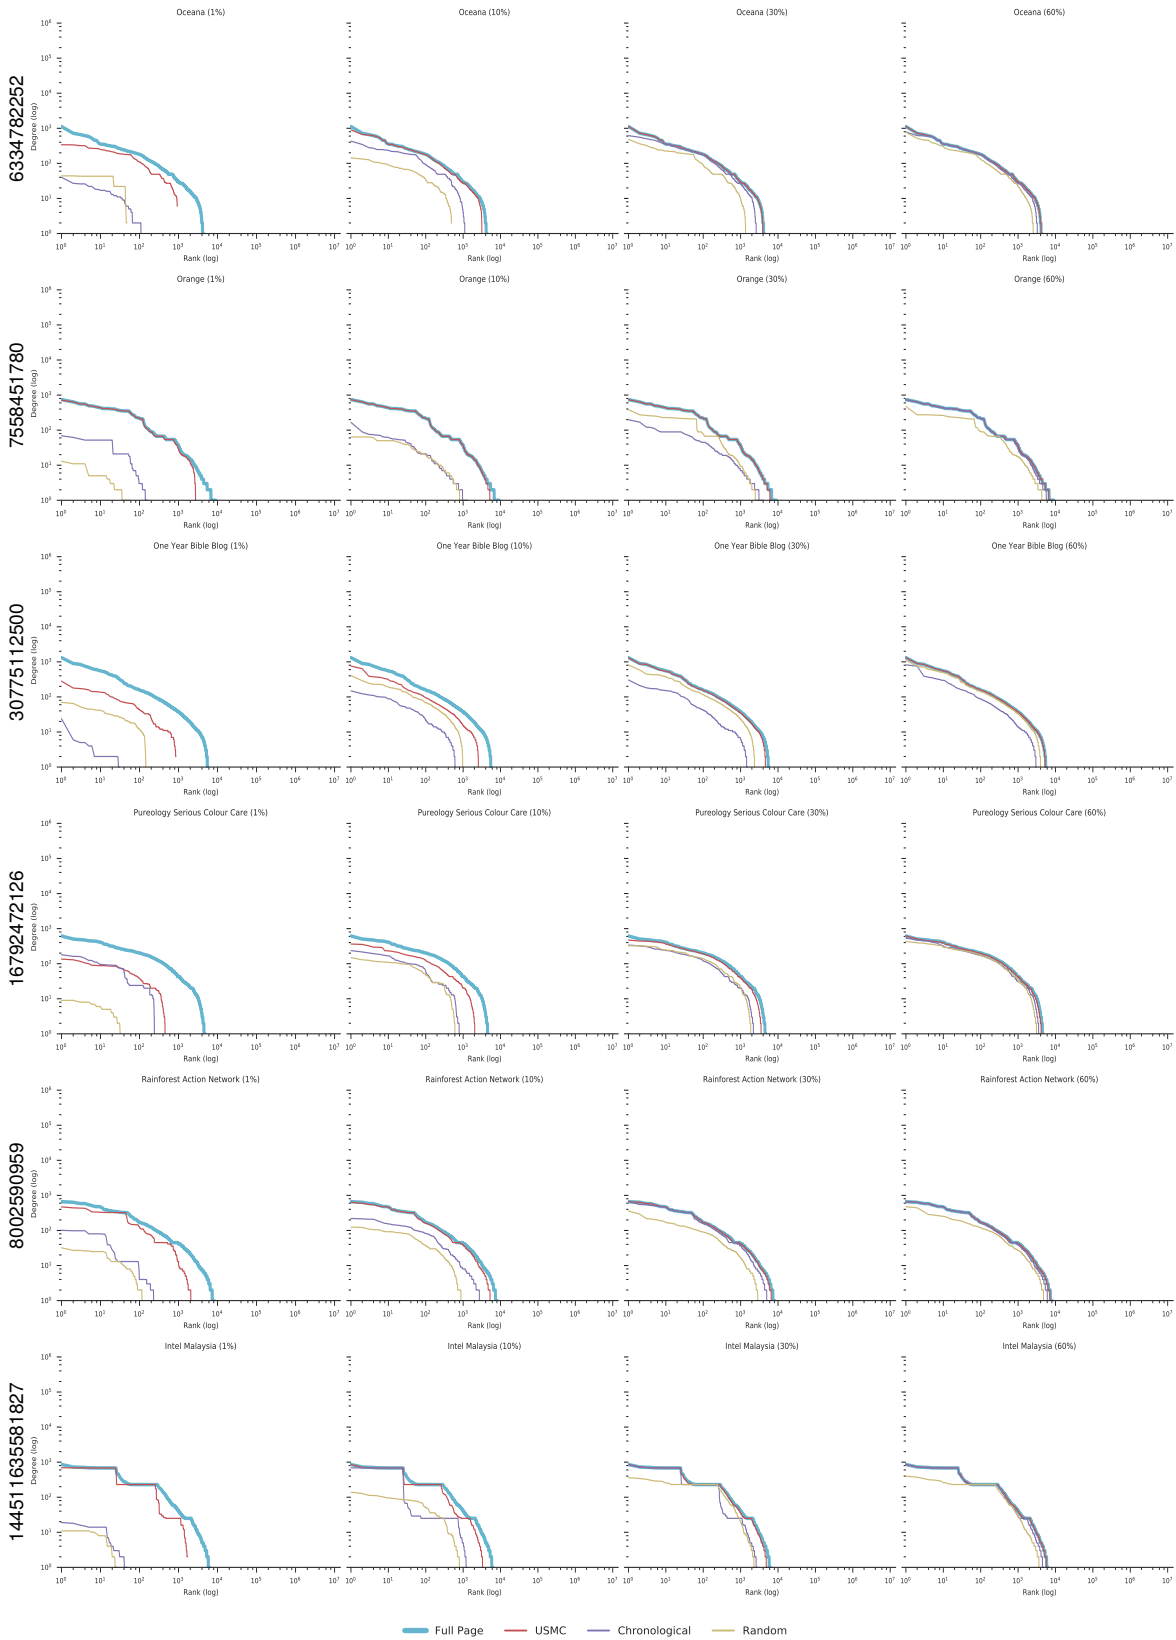

Continued on next page

**S2 Fig.** Degree distribution for the analysed Facebook pages. Each column represents a sample size (1%, 10%, 30%, and 60%), and each row represents a page.

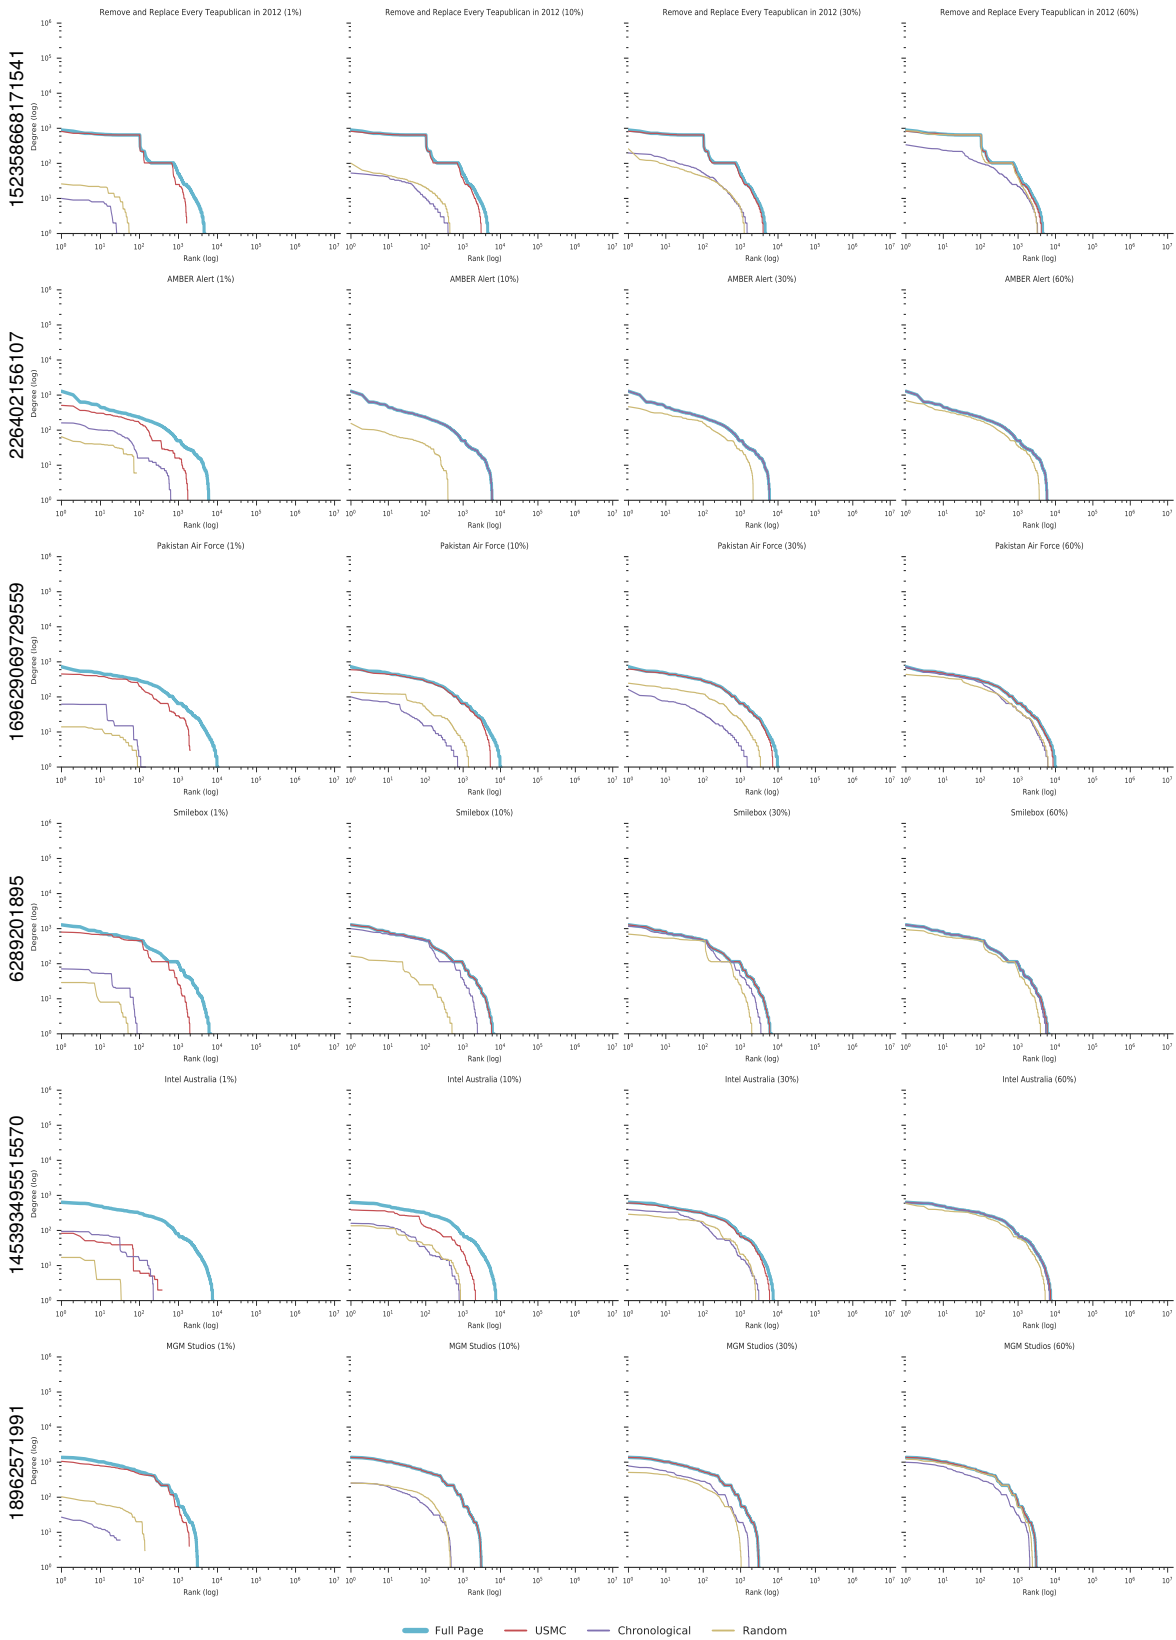

Continued on next page

**S2 Fig.** Degree distribution for the analysed Facebook pages. Each column represents a sample size (1%, 10%, 30%, and 60%), and each row represents a page.

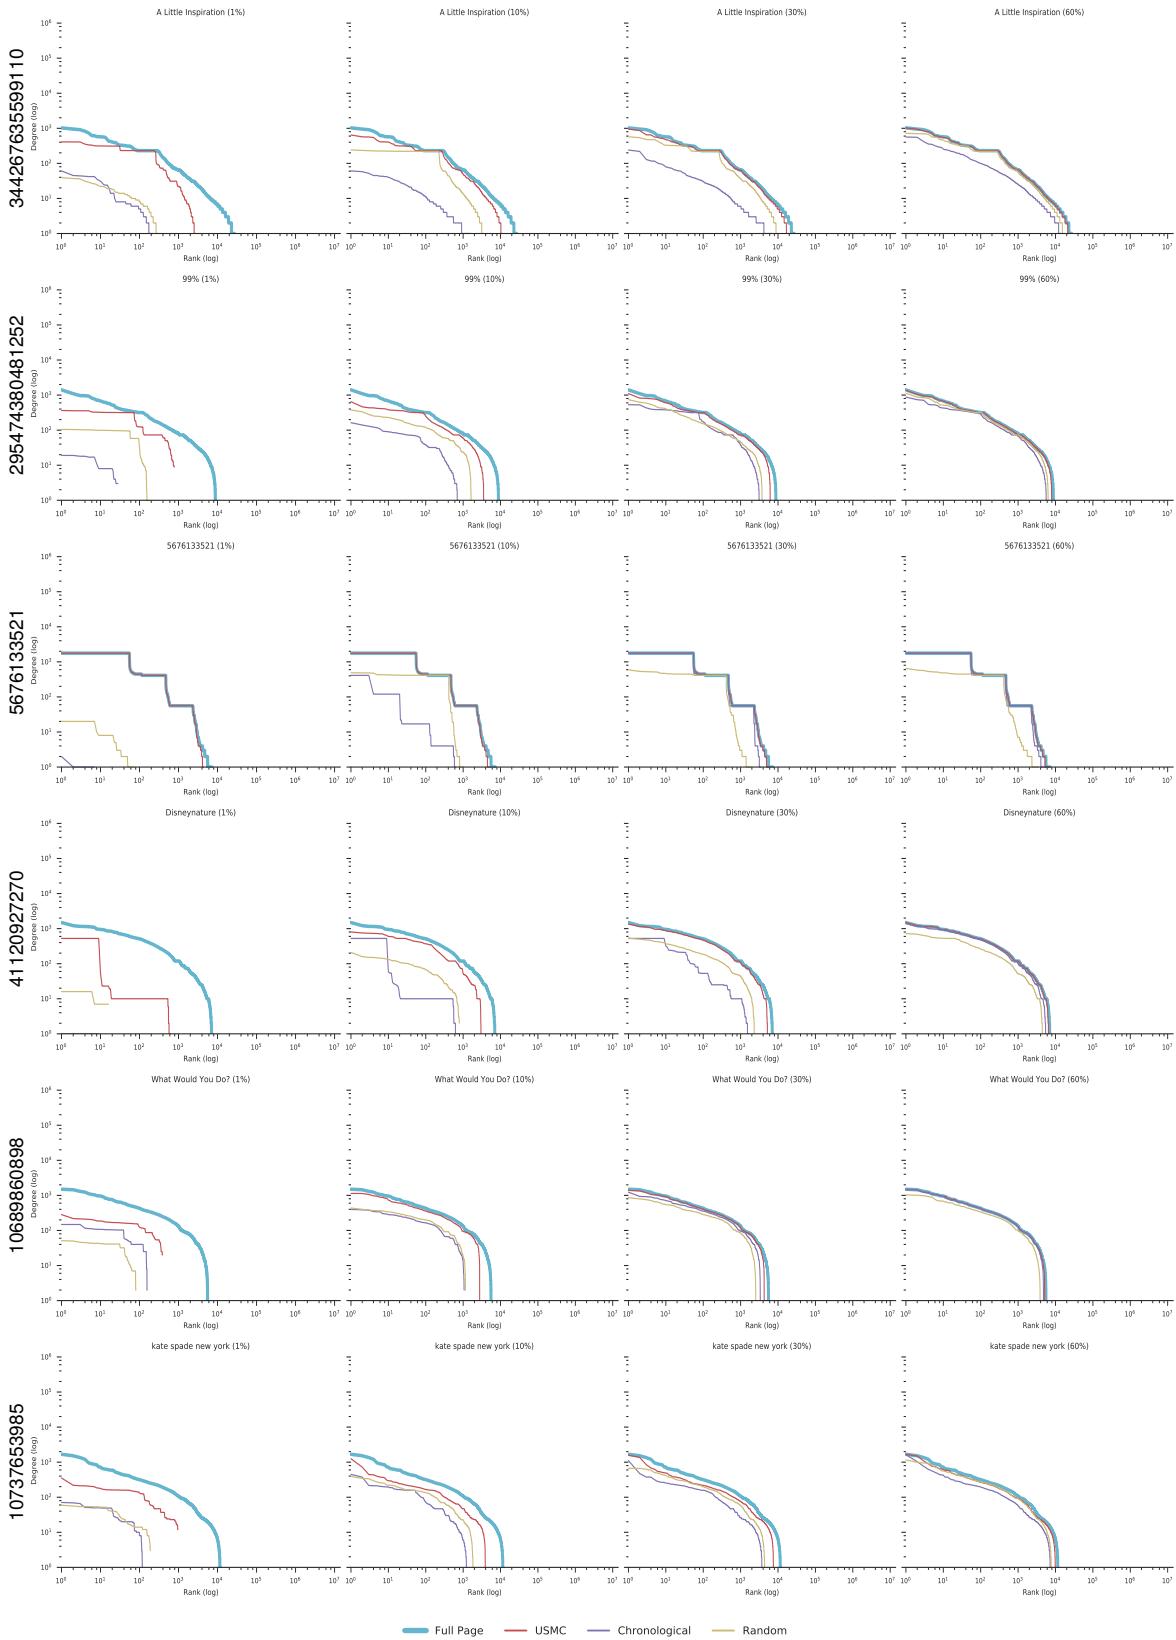

Continued on next page

**S2 Fig.** Degree distribution for the analysed Facebook pages. Each column represents a sample size (1%, 10%, 30%, and 60%), and each row represents a page.

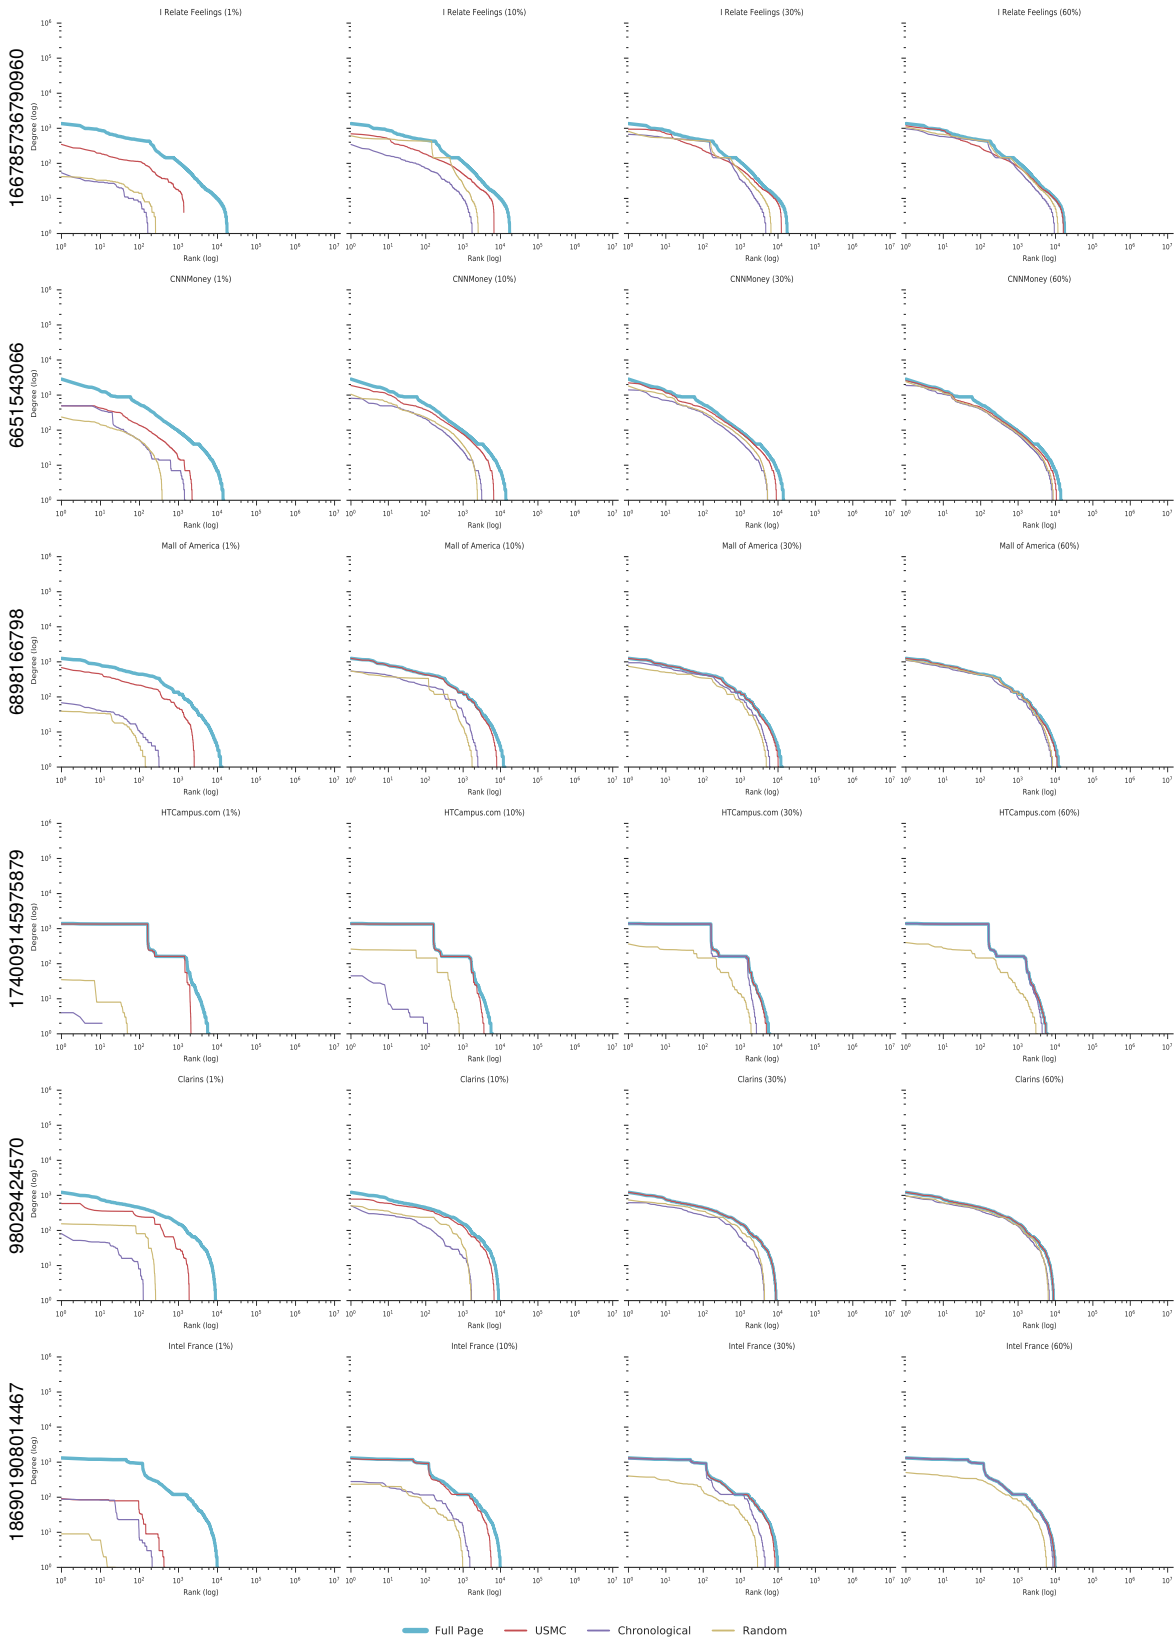

Continued on next page

**S2 Fig.** Degree distribution for the analysed Facebook pages. Each column represents a sample size (1%, 10%, 30%, and 60%), and each row represents a page.

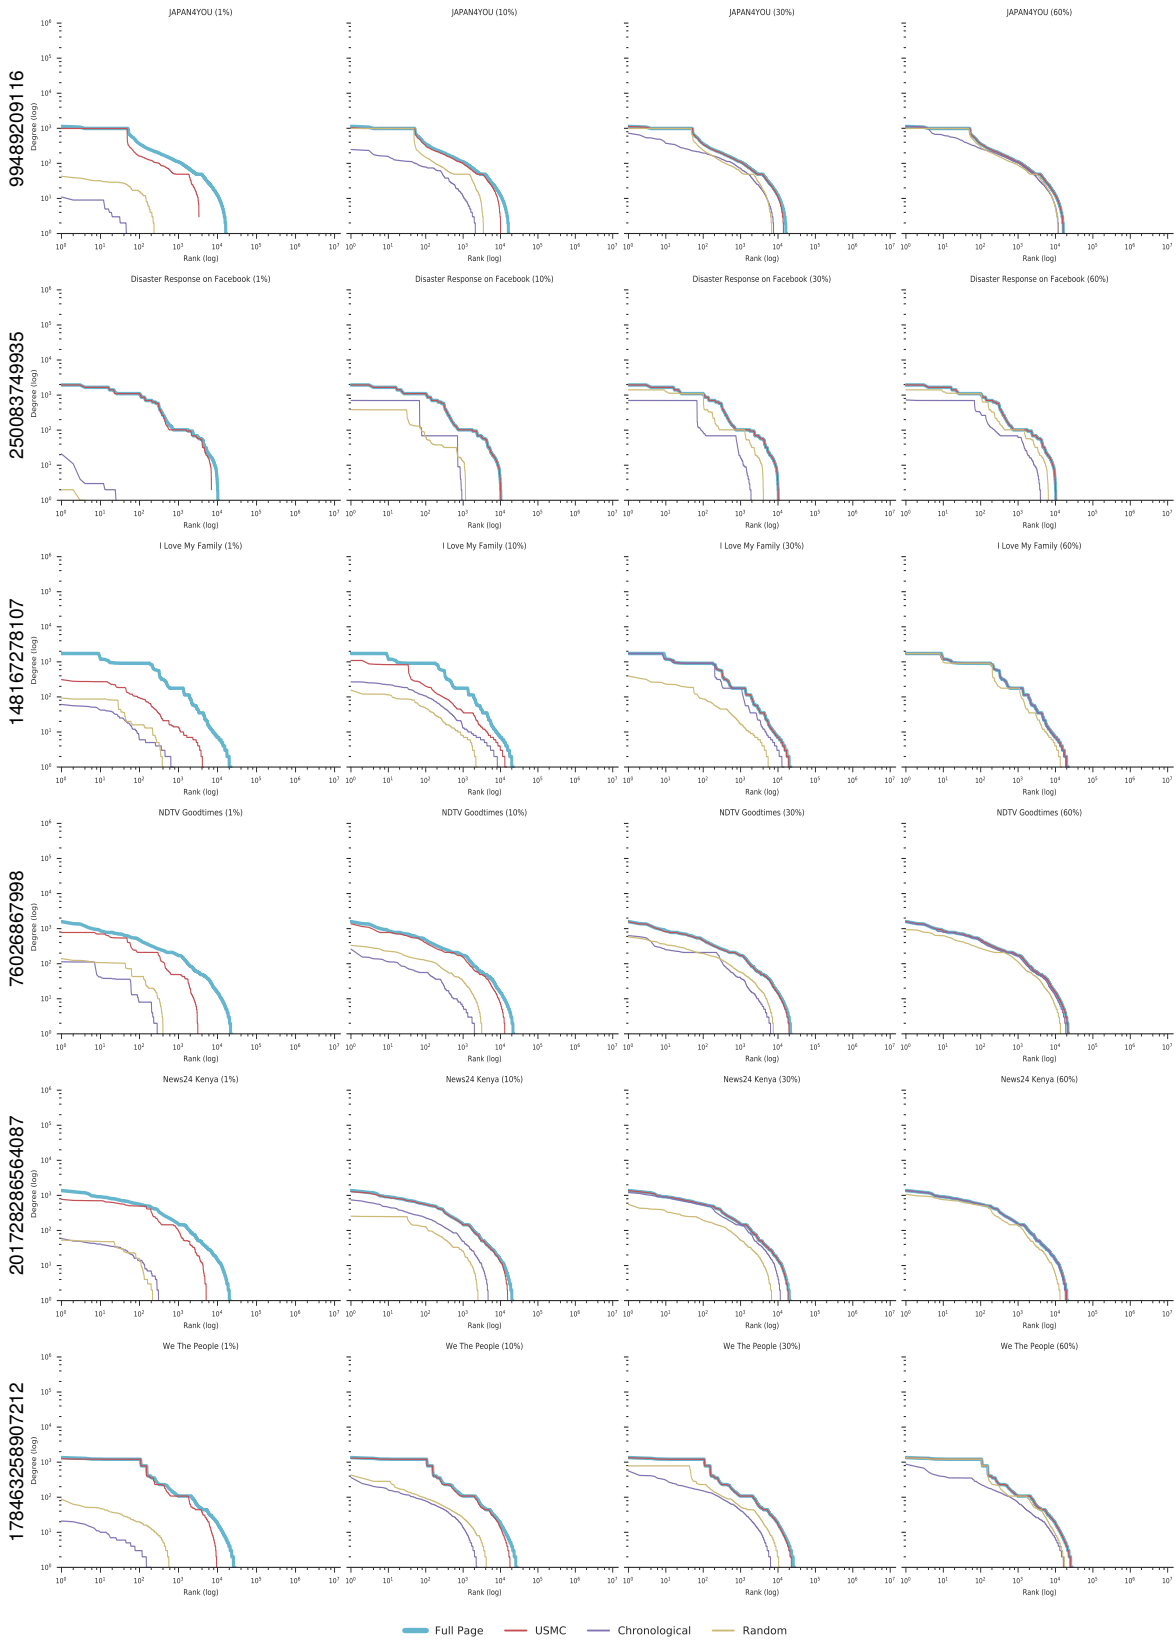

Continued on next page

**S2 Fig.** Degree distribution for the analysed Facebook pages. Each column represents a sample size (1%, 10%, 30%, and 60%), and each row represents a page.



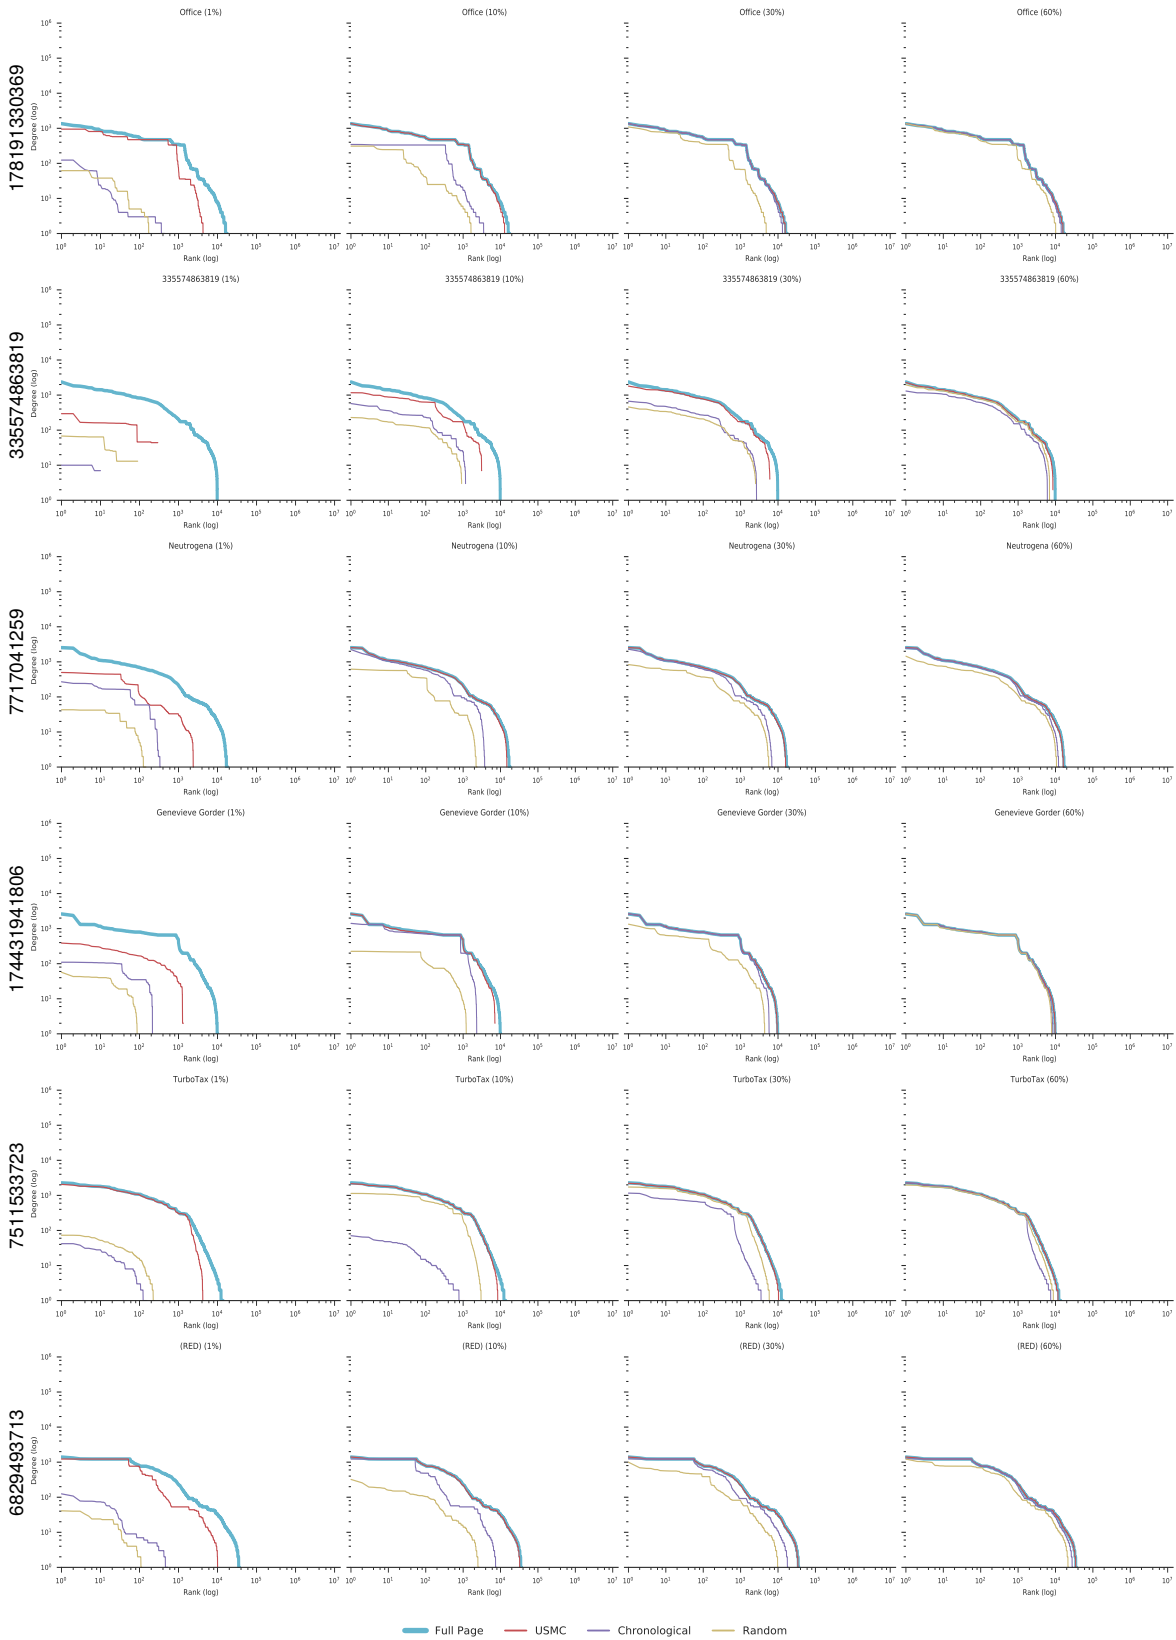

Continued on next page

**S2 Fig.** Degree distribution for the analysed Facebook pages. Each column represents a sample size (1%, 10%, 30%, and 60%), and each row represents a page.

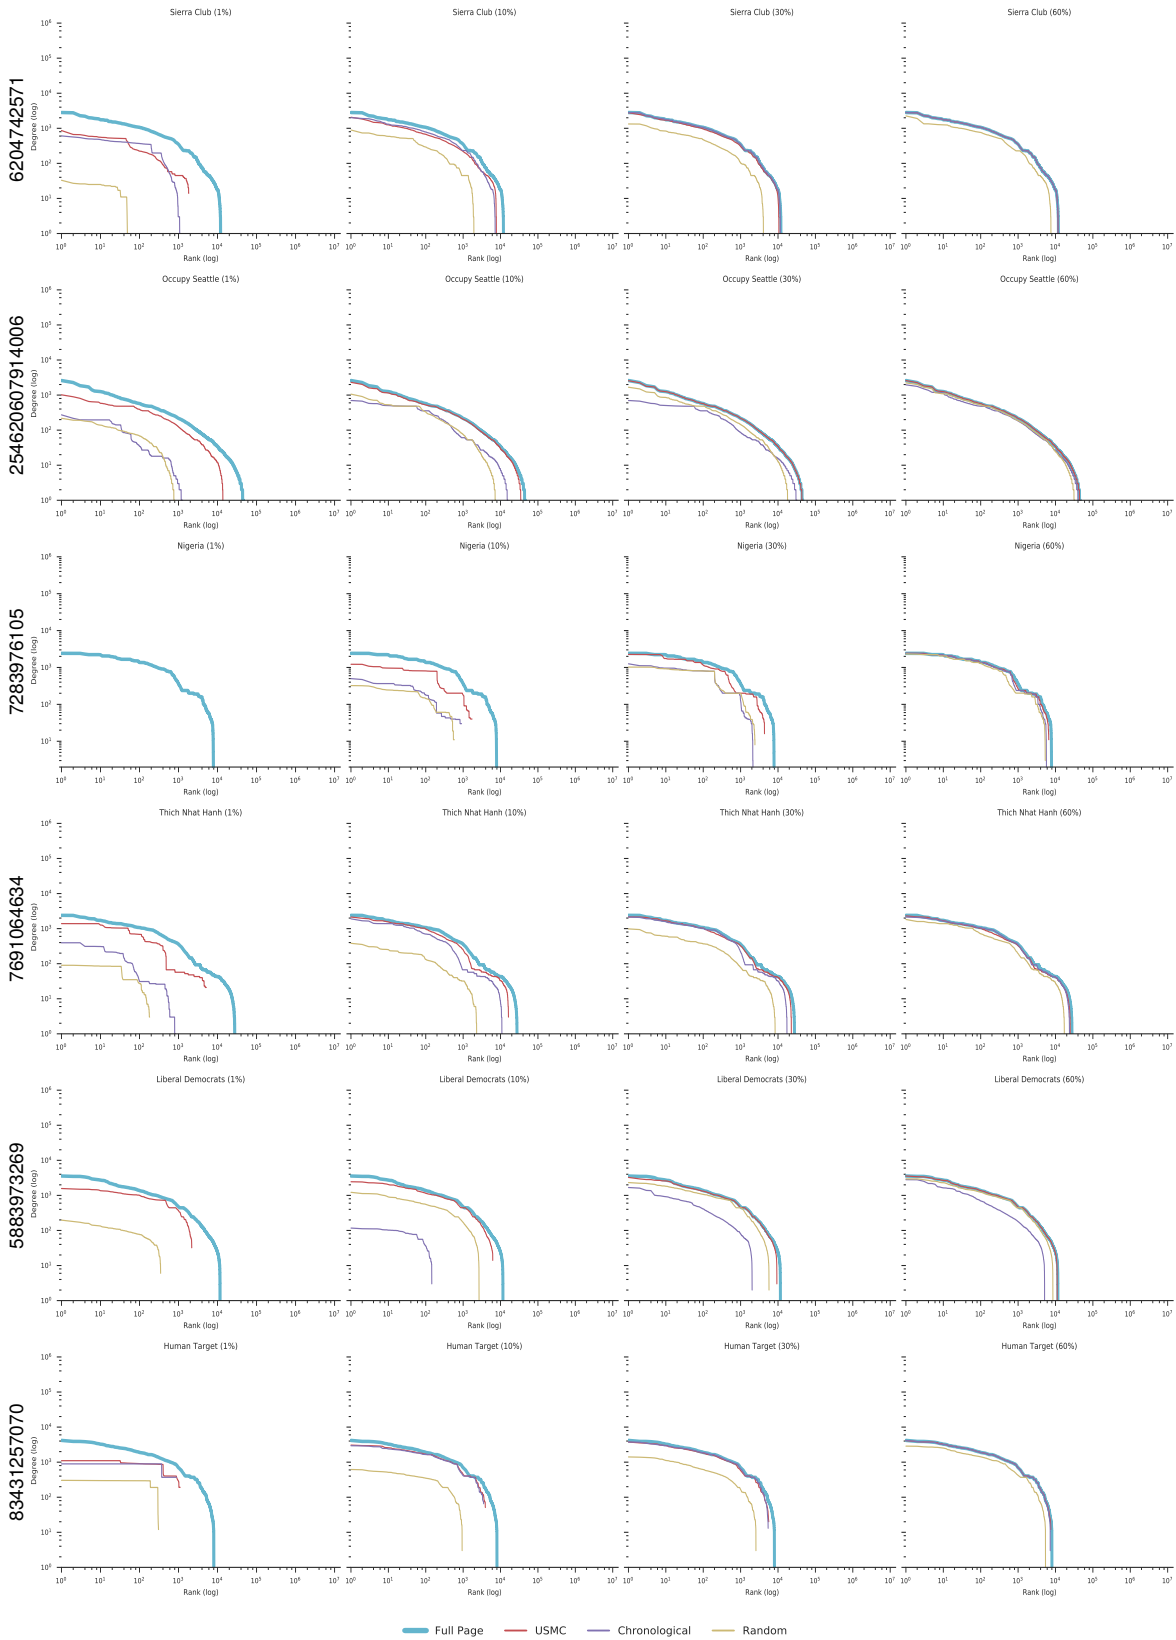

Continued on next page

**S2 Fig.** Degree distribution for the analysed Facebook pages. Each column represents a sample size (1%, 10%, 30%, and 60%), and each row represents a page.

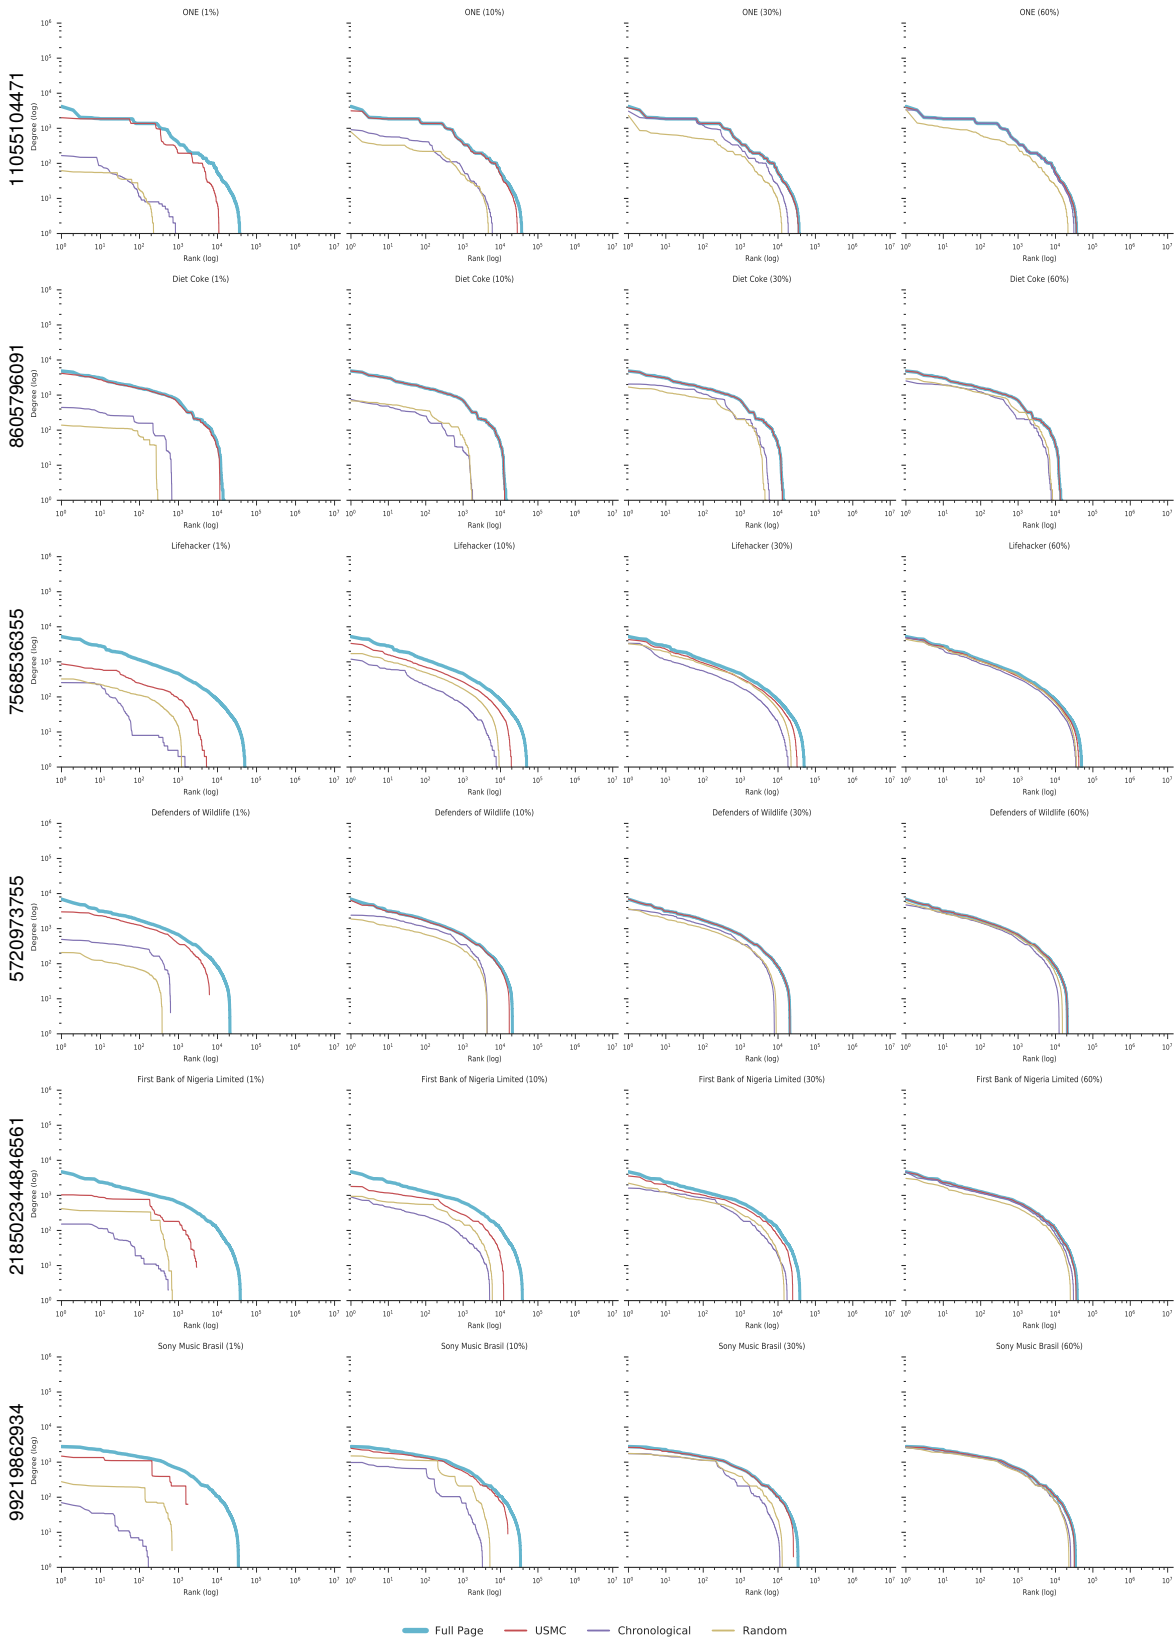

Continued on next page

**S2 Fig.** Degree distribution for the analysed Facebook pages. Each column represents a sample size (1%, 10%, 30%, and 60%), and each row represents a page.

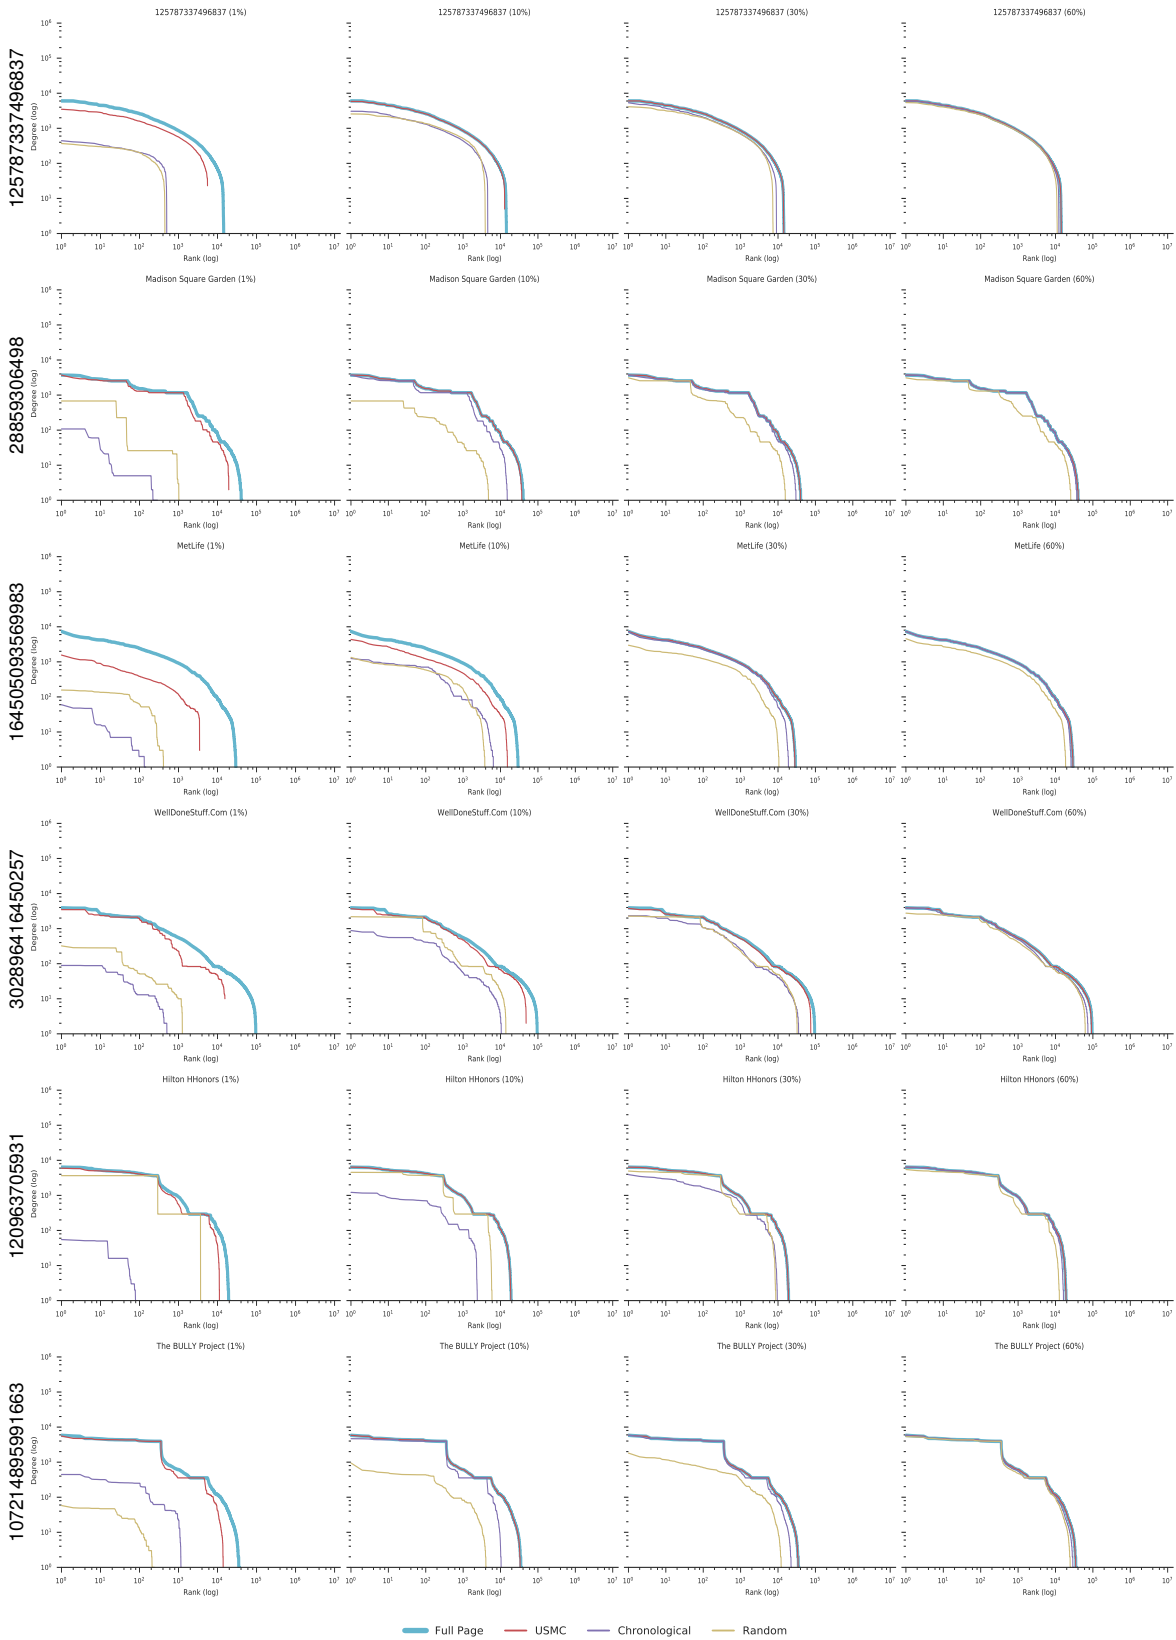

Continued on next page

**S2 Fig.** Degree distribution for the analysed Facebook pages. Each column represents a sample size (1%, 10%, 30%, and 60%), and each row represents a page.

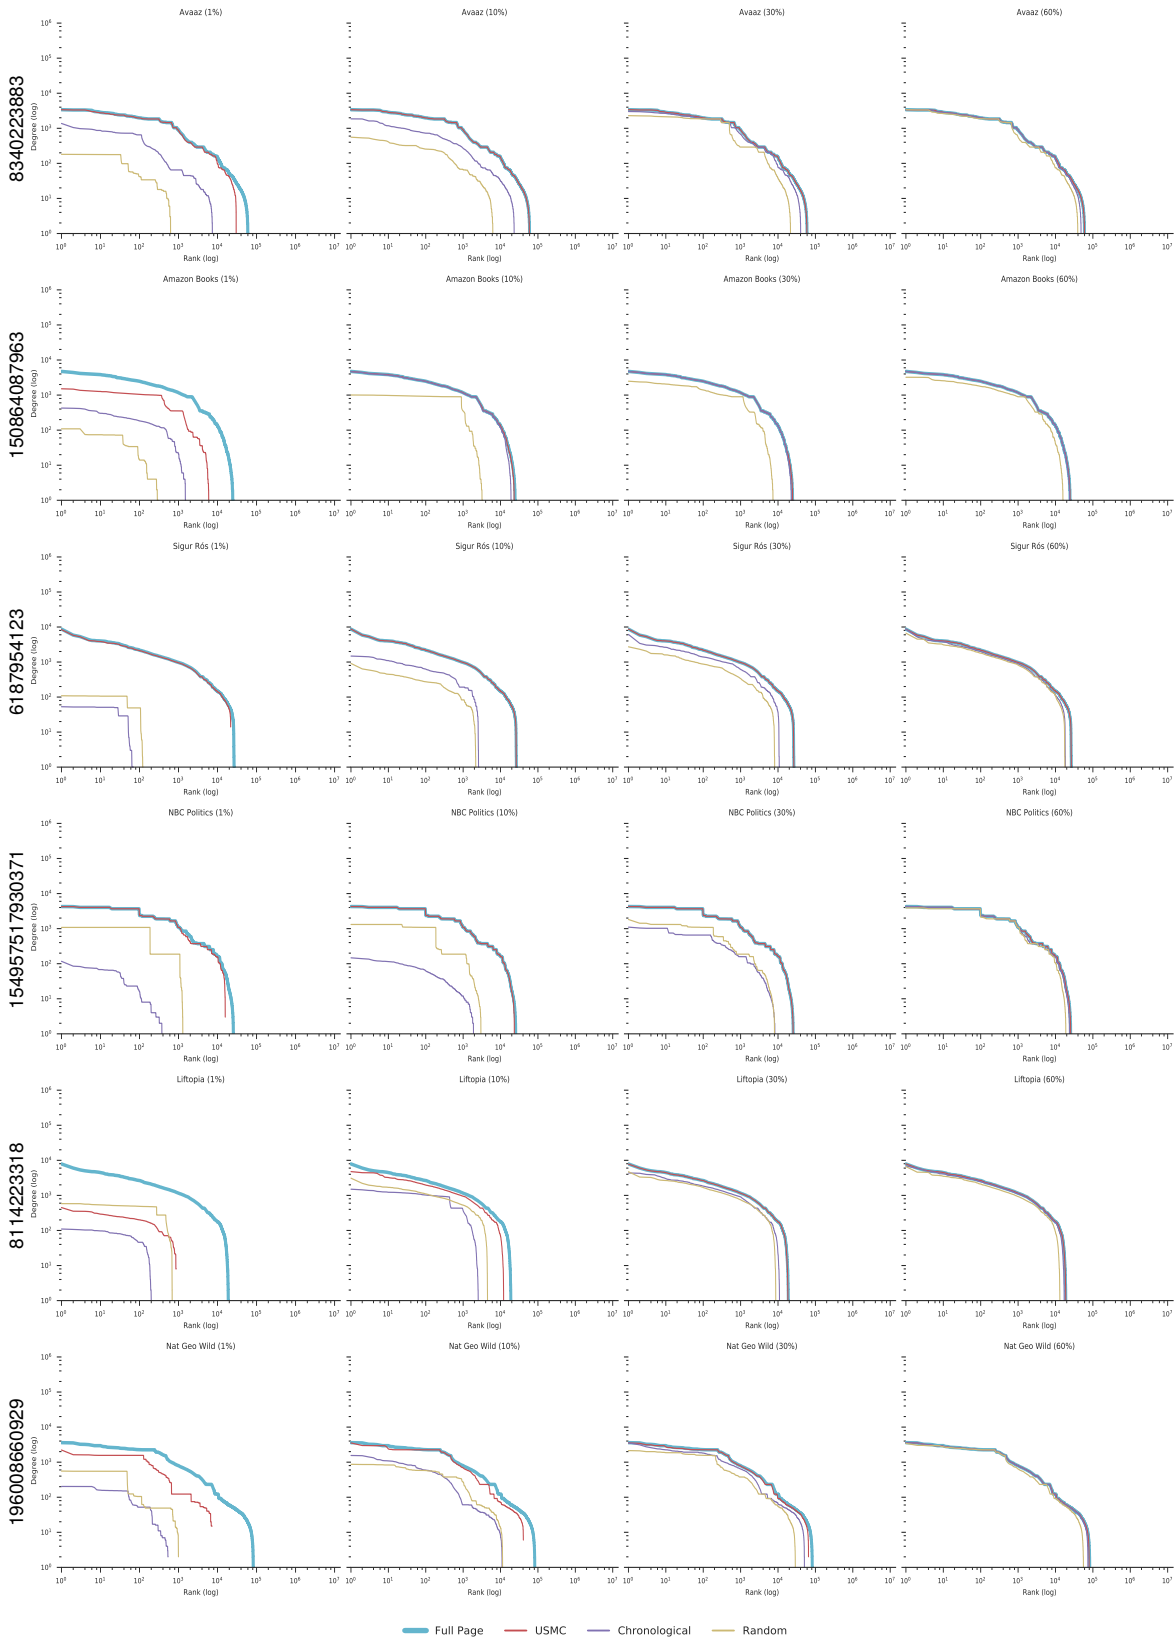

Continued on next page

**S2 Fig.** Degree distribution for the analysed Facebook pages. Each column represents a sample size (1%, 10%, 30%, and 60%), and each row represents a page.

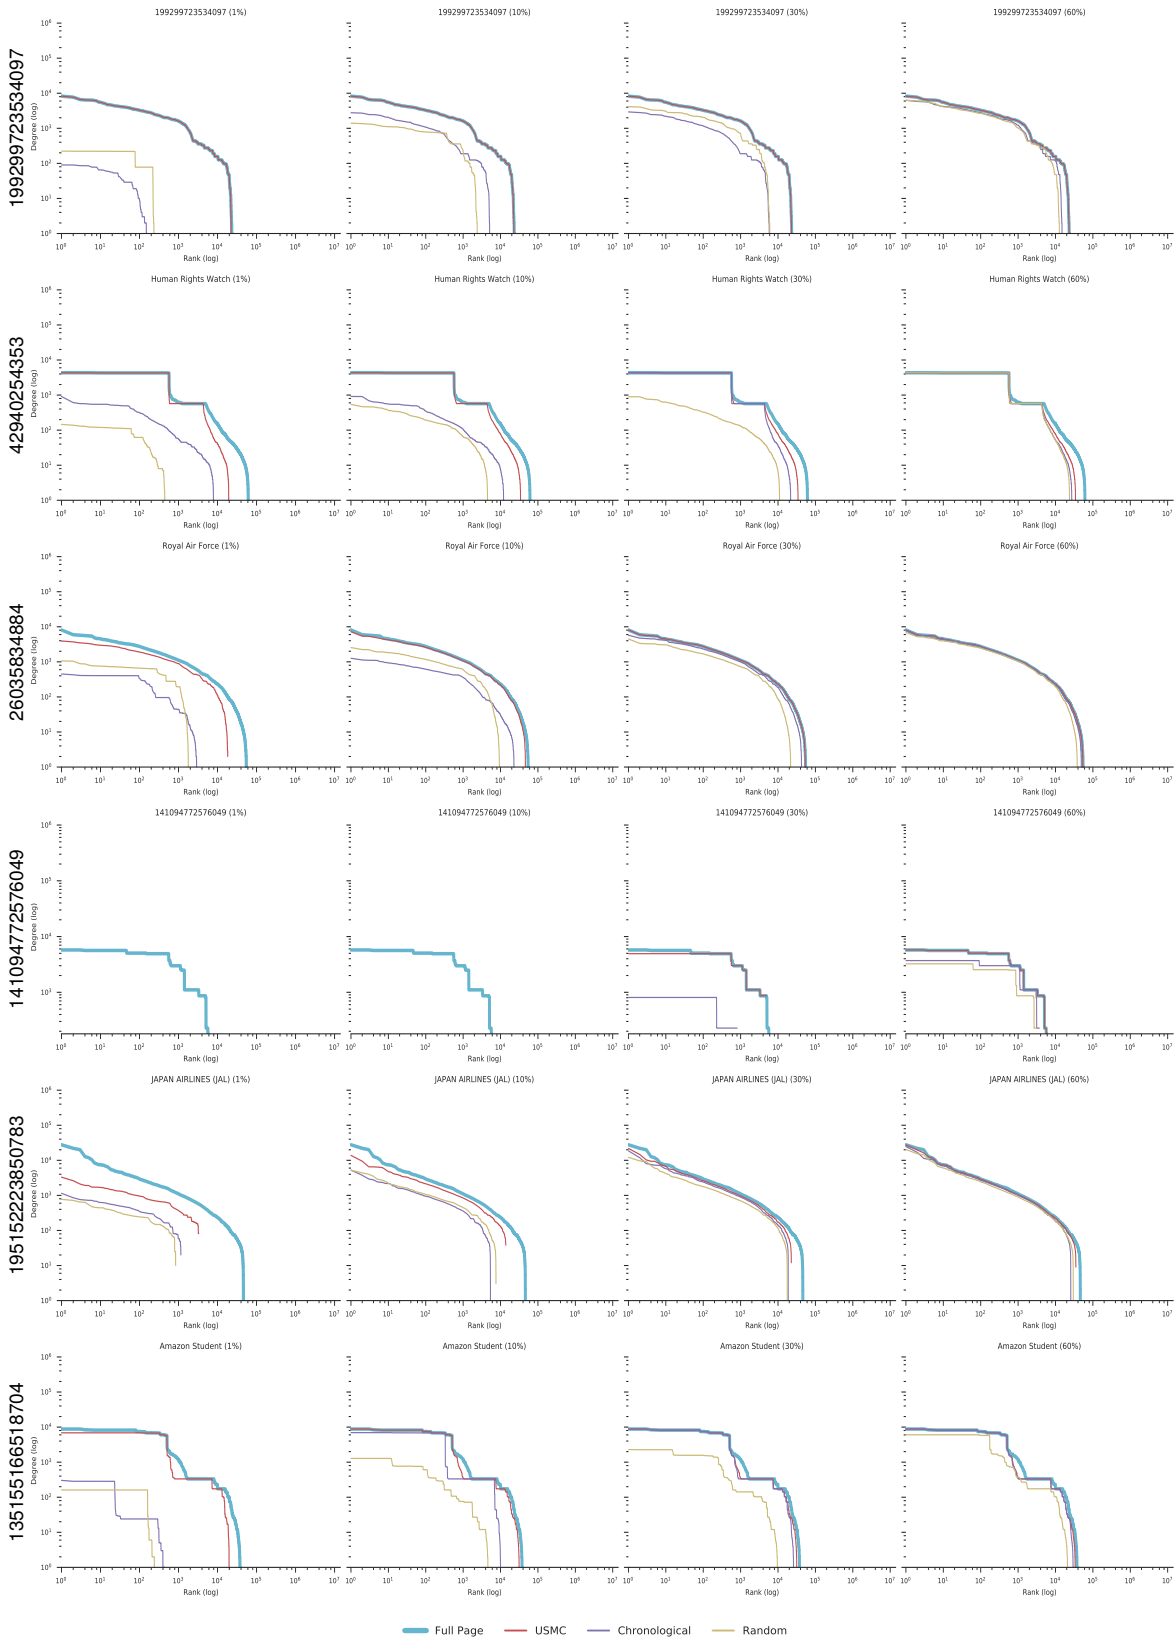

Continued on next page

**S2 Fig.** Degree distribution for the analysed Facebook pages. Each column represents a sample size (1%, 10%, 30%, and 60%), and each row represents a page.

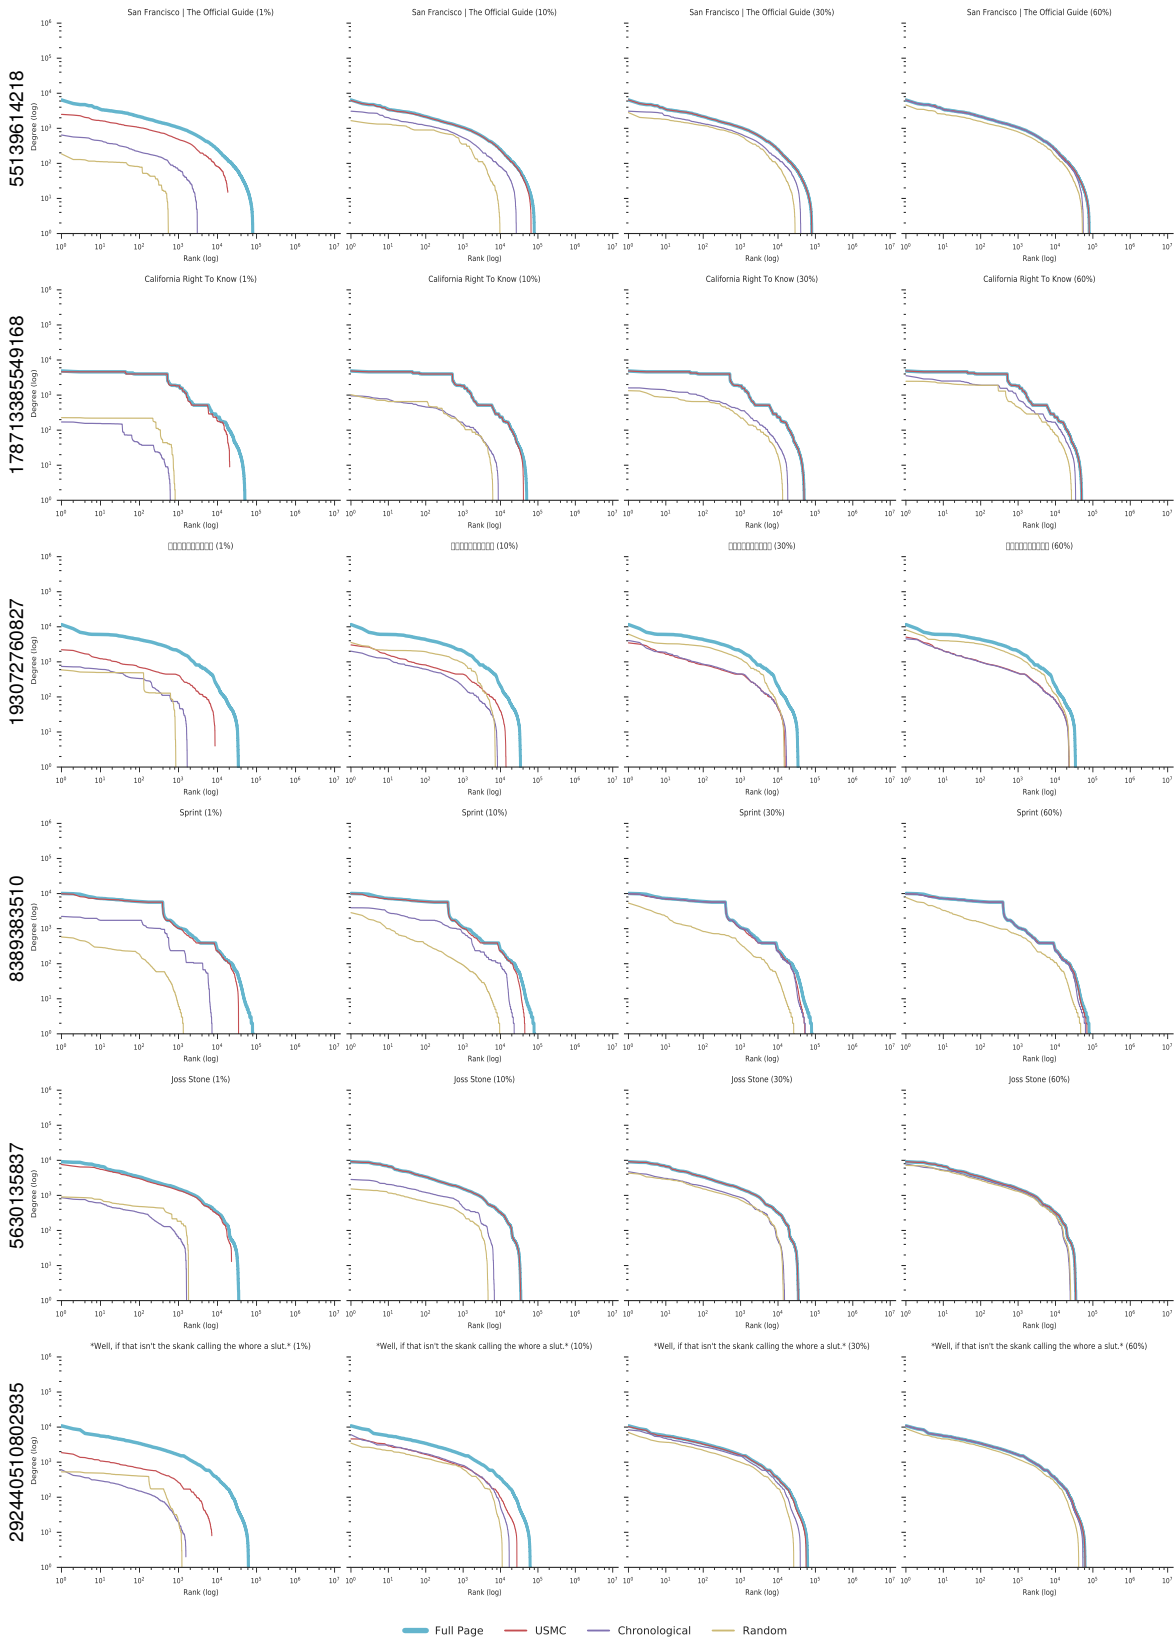

Continued on next page

**S2 Fig.** Degree distribution for the analysed Facebook pages. Each column represents a sample size (1%, 10%, 30%, and 60%), and each row represents a page.

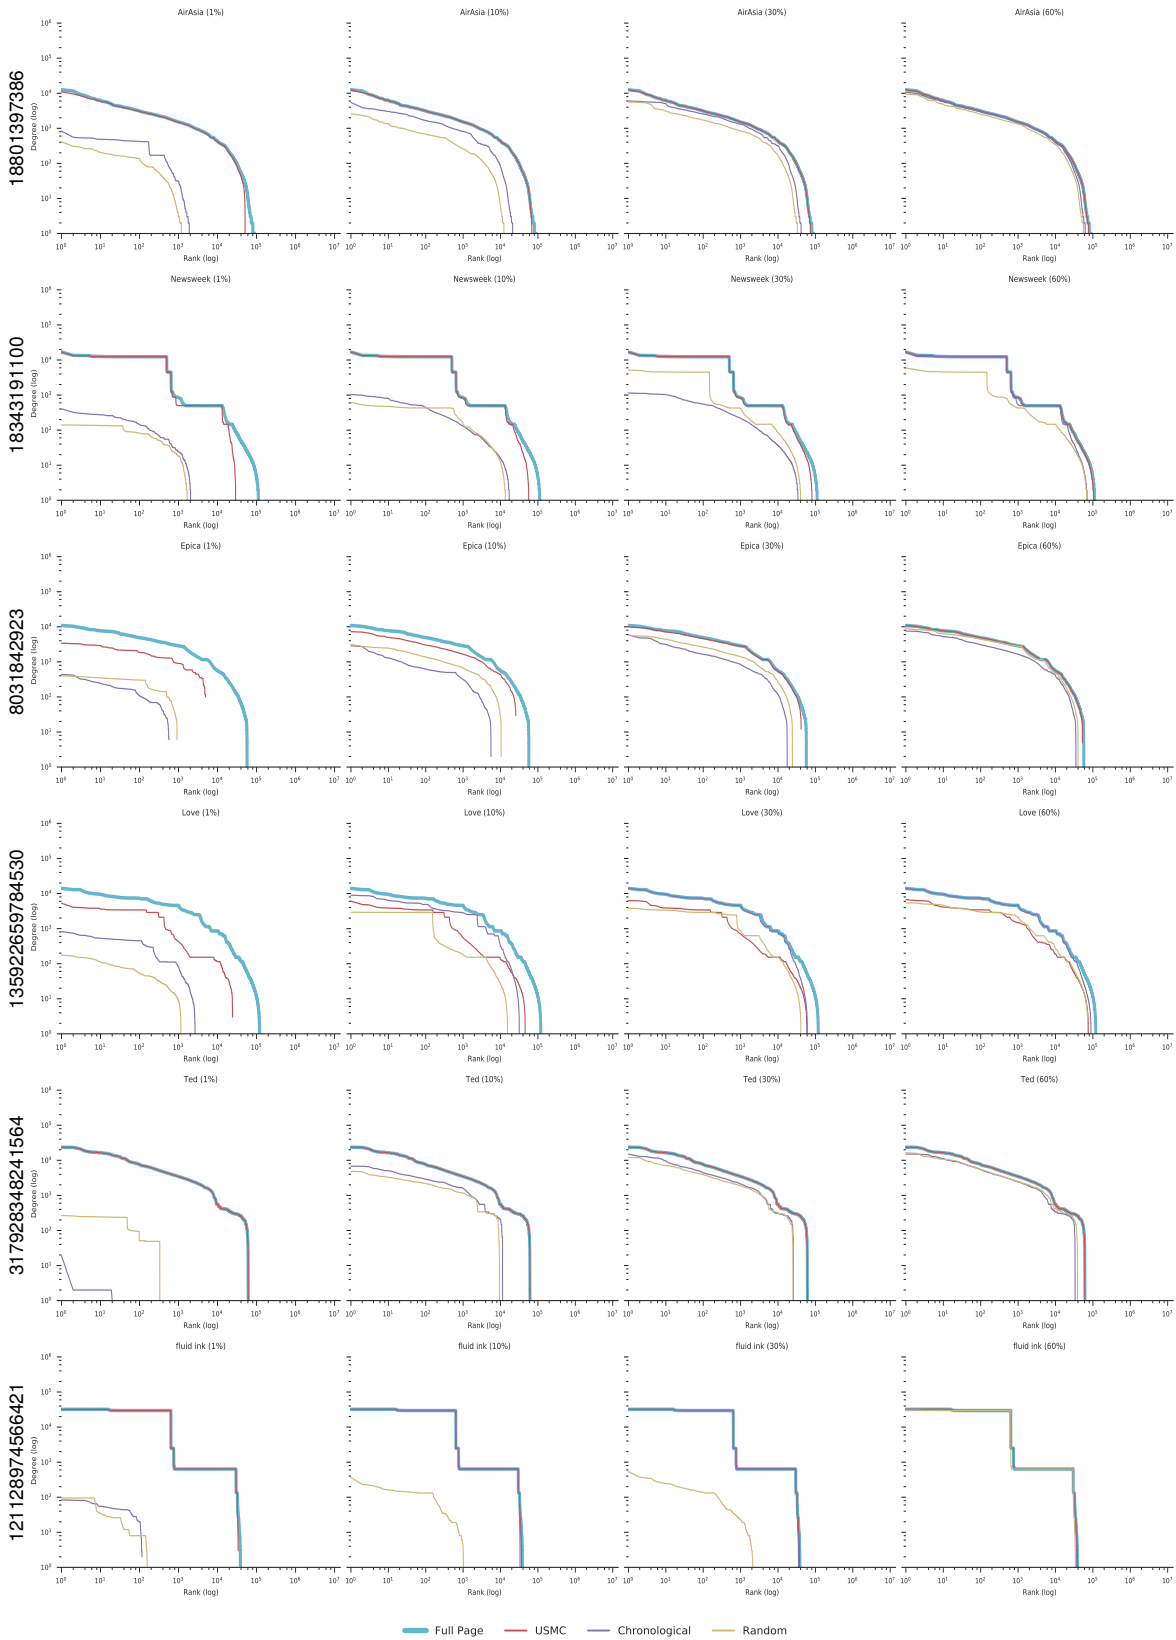

Continued on next page

**S2 Fig.** Degree distribution for the analysed Facebook pages. Each column represents a sample size (1%, 10%, 30%, and 60%), and each row represents a page.



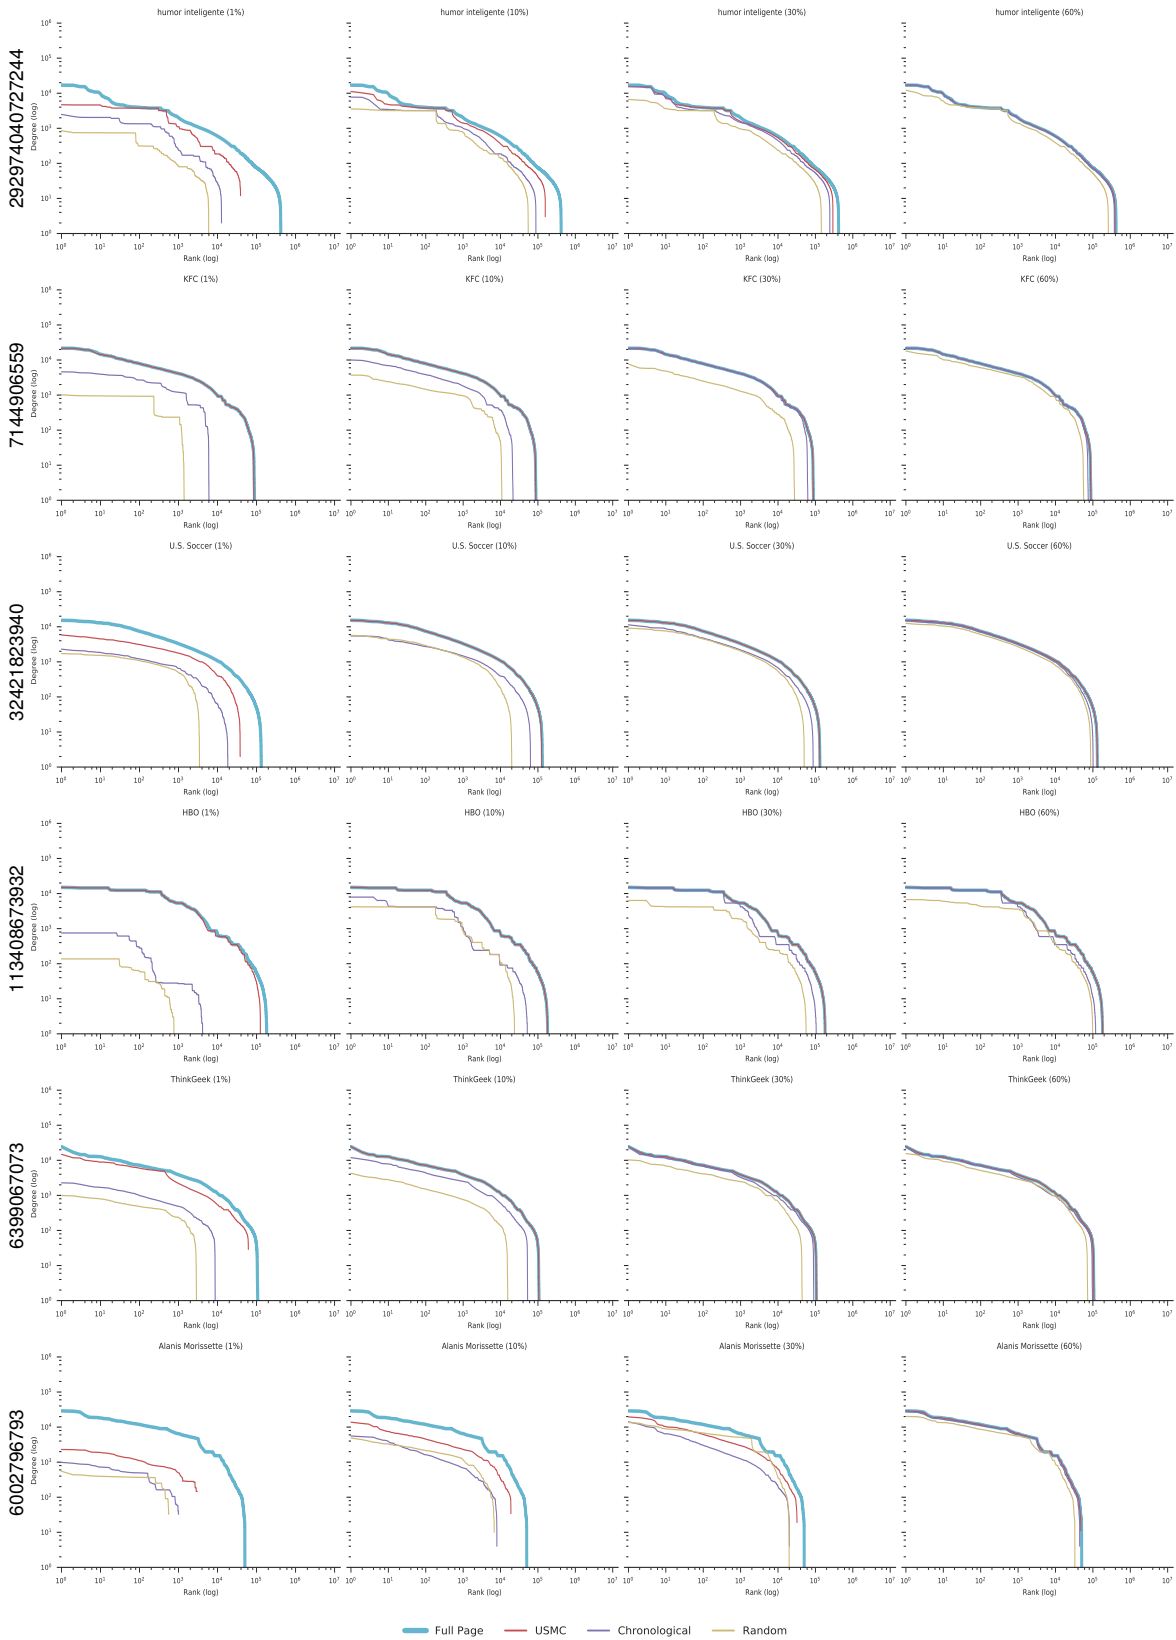

Continued on next page

**S2 Fig.** Degree distribution for the analysed Facebook pages. Each column represents a sample size (1%, 10%, 30%, and 60%), and each row represents a page.

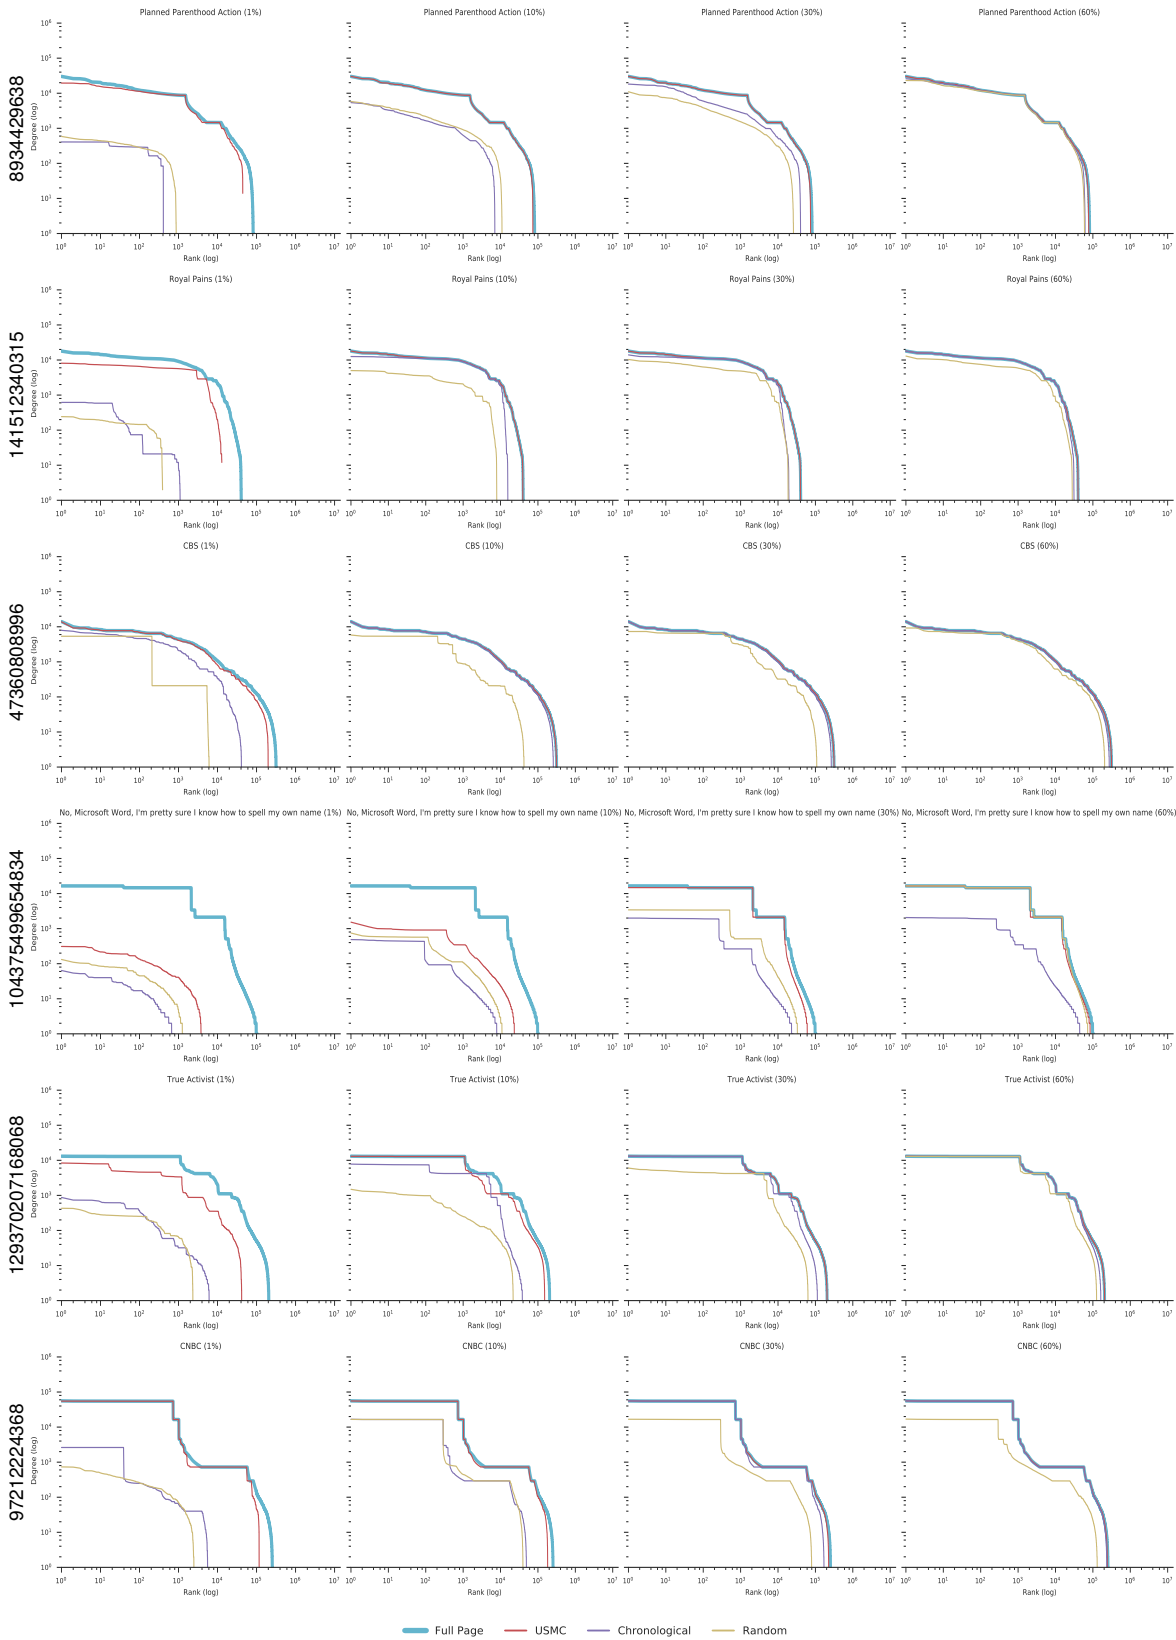

Continued on next page

**S2 Fig.** Degree distribution for the analysed Facebook pages. Each column represents a sample size (1%, 10%, 30%, and 60%), and each row represents a page.

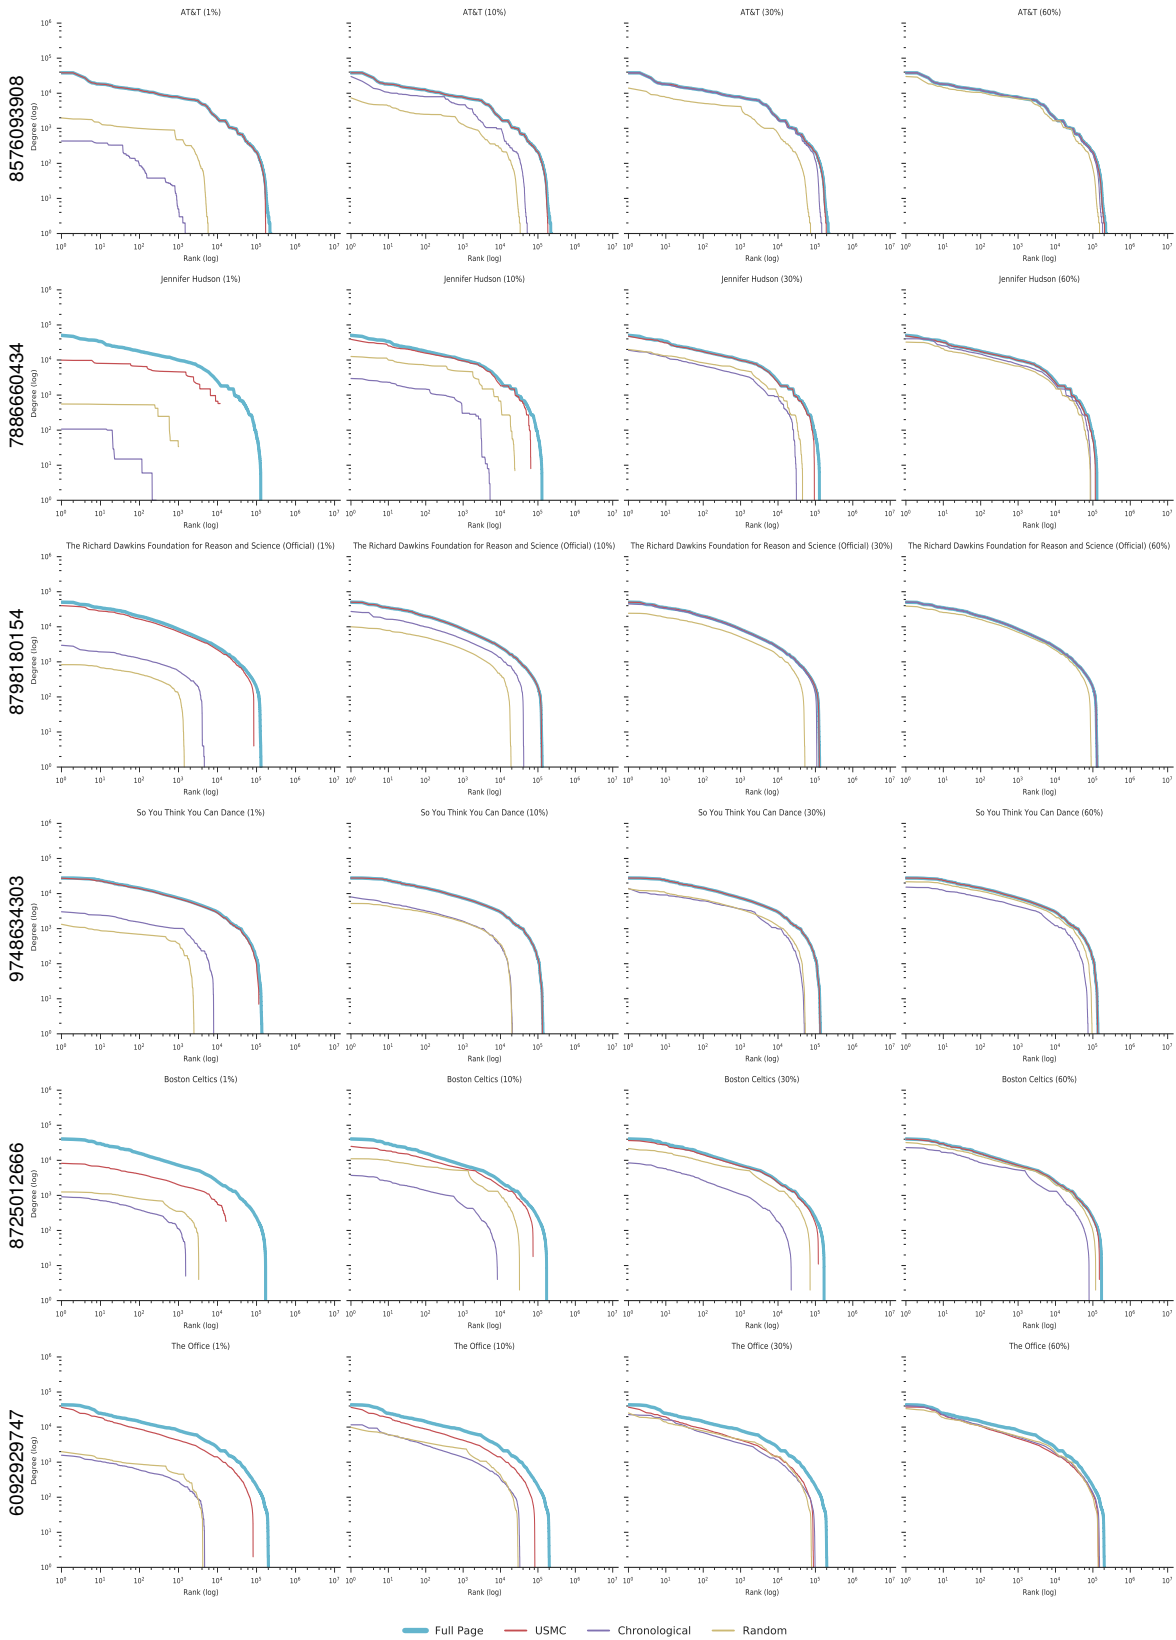

Continued on next page

**S2 Fig.** Degree distribution for the analysed Facebook pages. Each column represents a sample size (1%, 10%, 30%, and 60%), and each row represents a page.

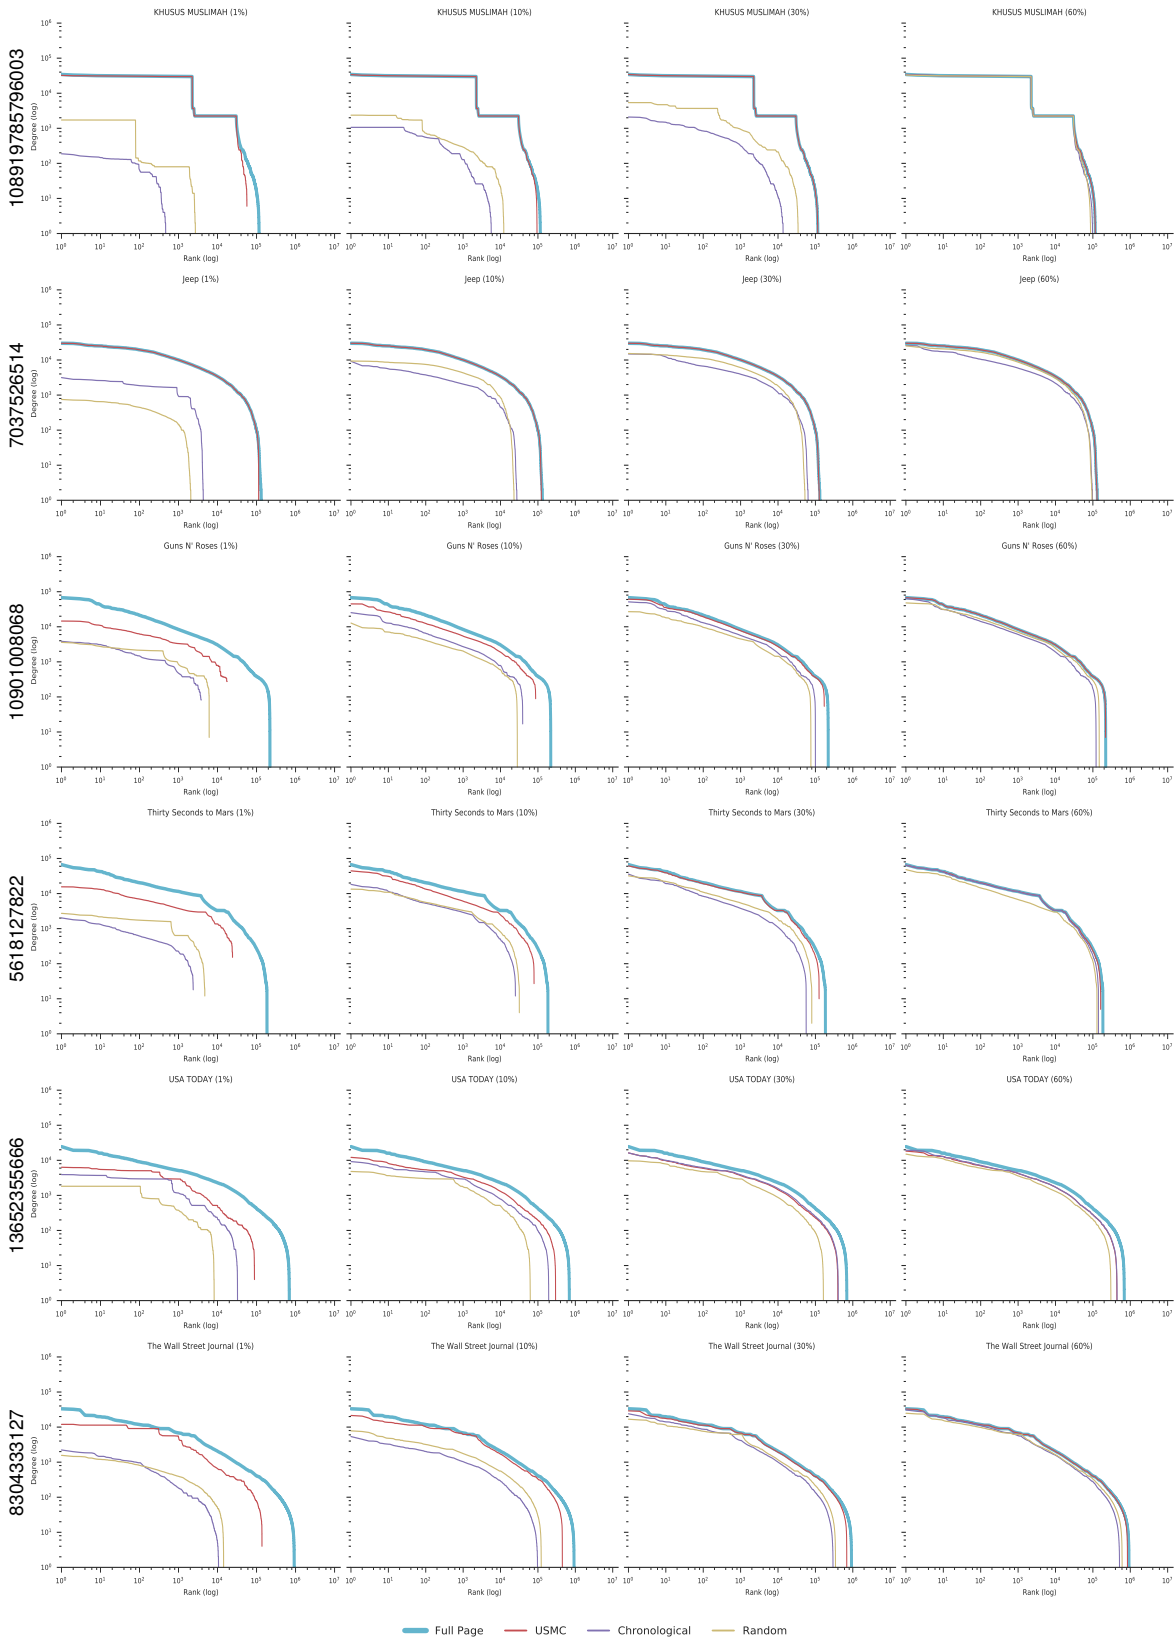

Continued on next page

**S2 Fig.** Degree distribution for the analysed Facebook pages. Each column represents a sample size (1%, 10%, 30%, and 60%), and each row represents a page.

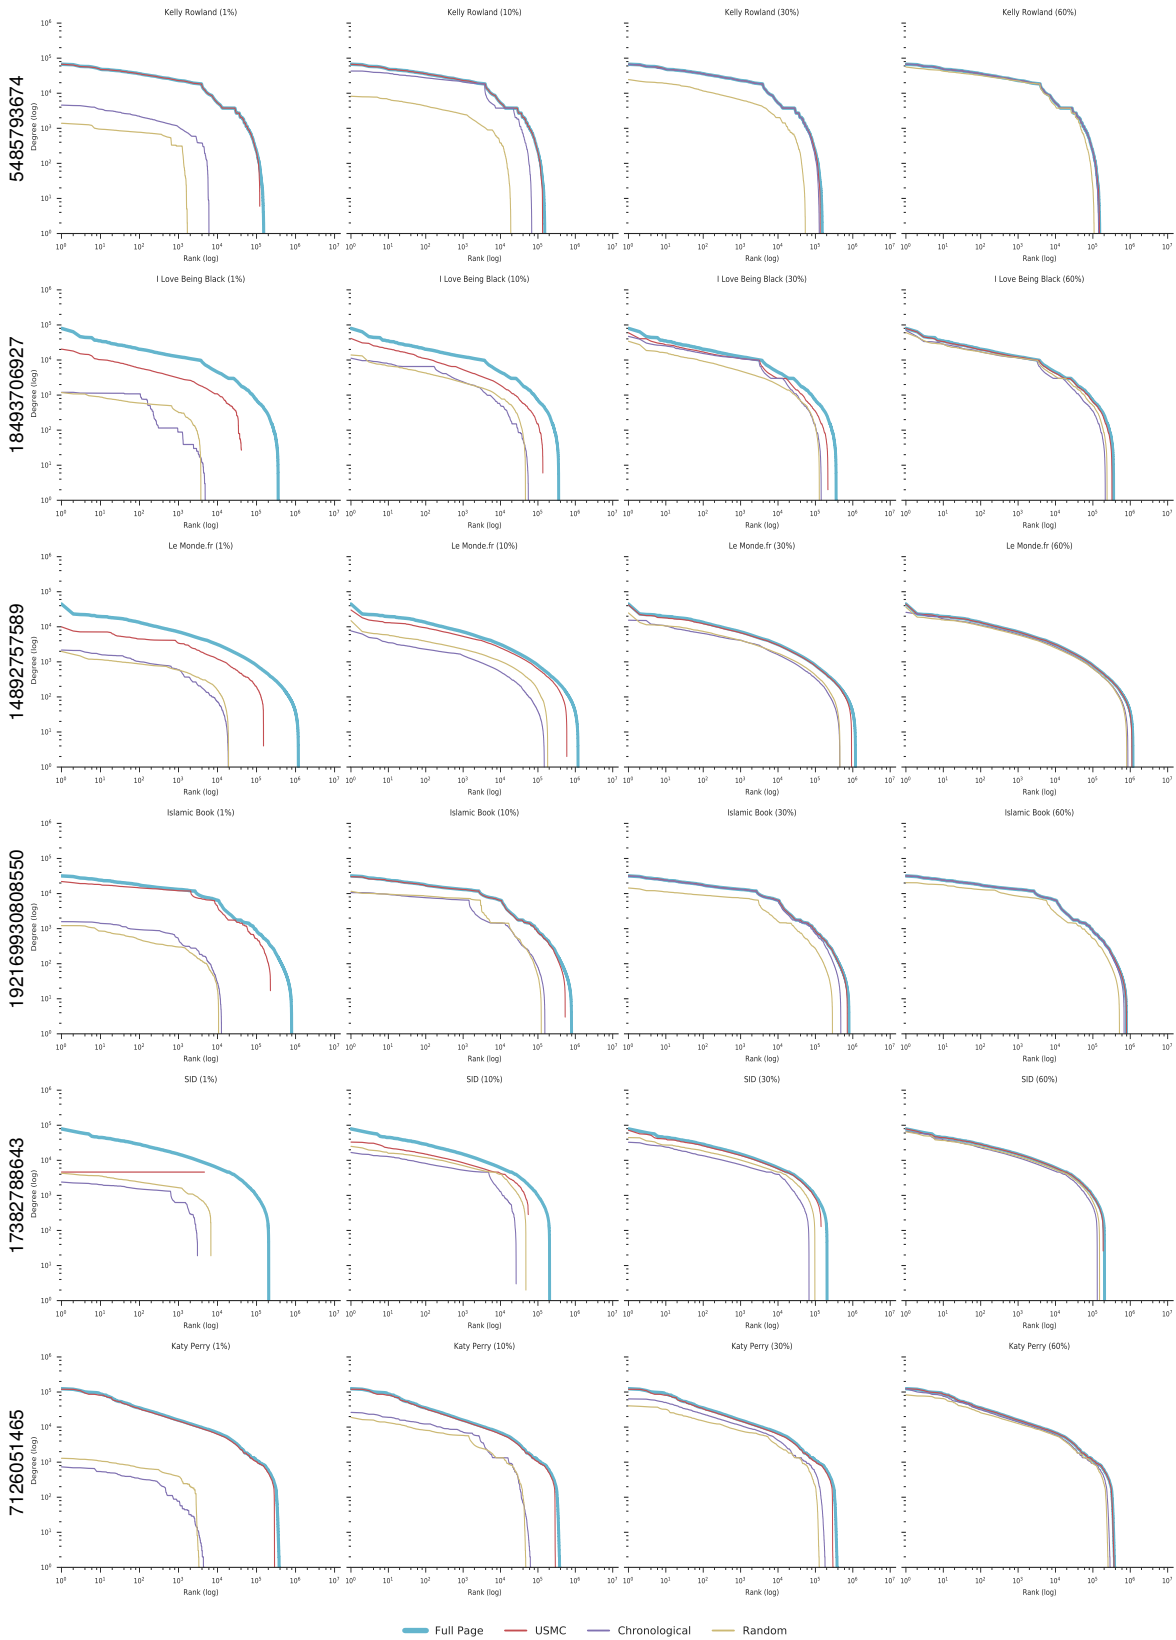

Continued on next page

**S2 Fig.** Degree distribution for the analysed Facebook pages. Each column represents a sample size (1%, 10%, 30%, and 60%), and each row represents a page.

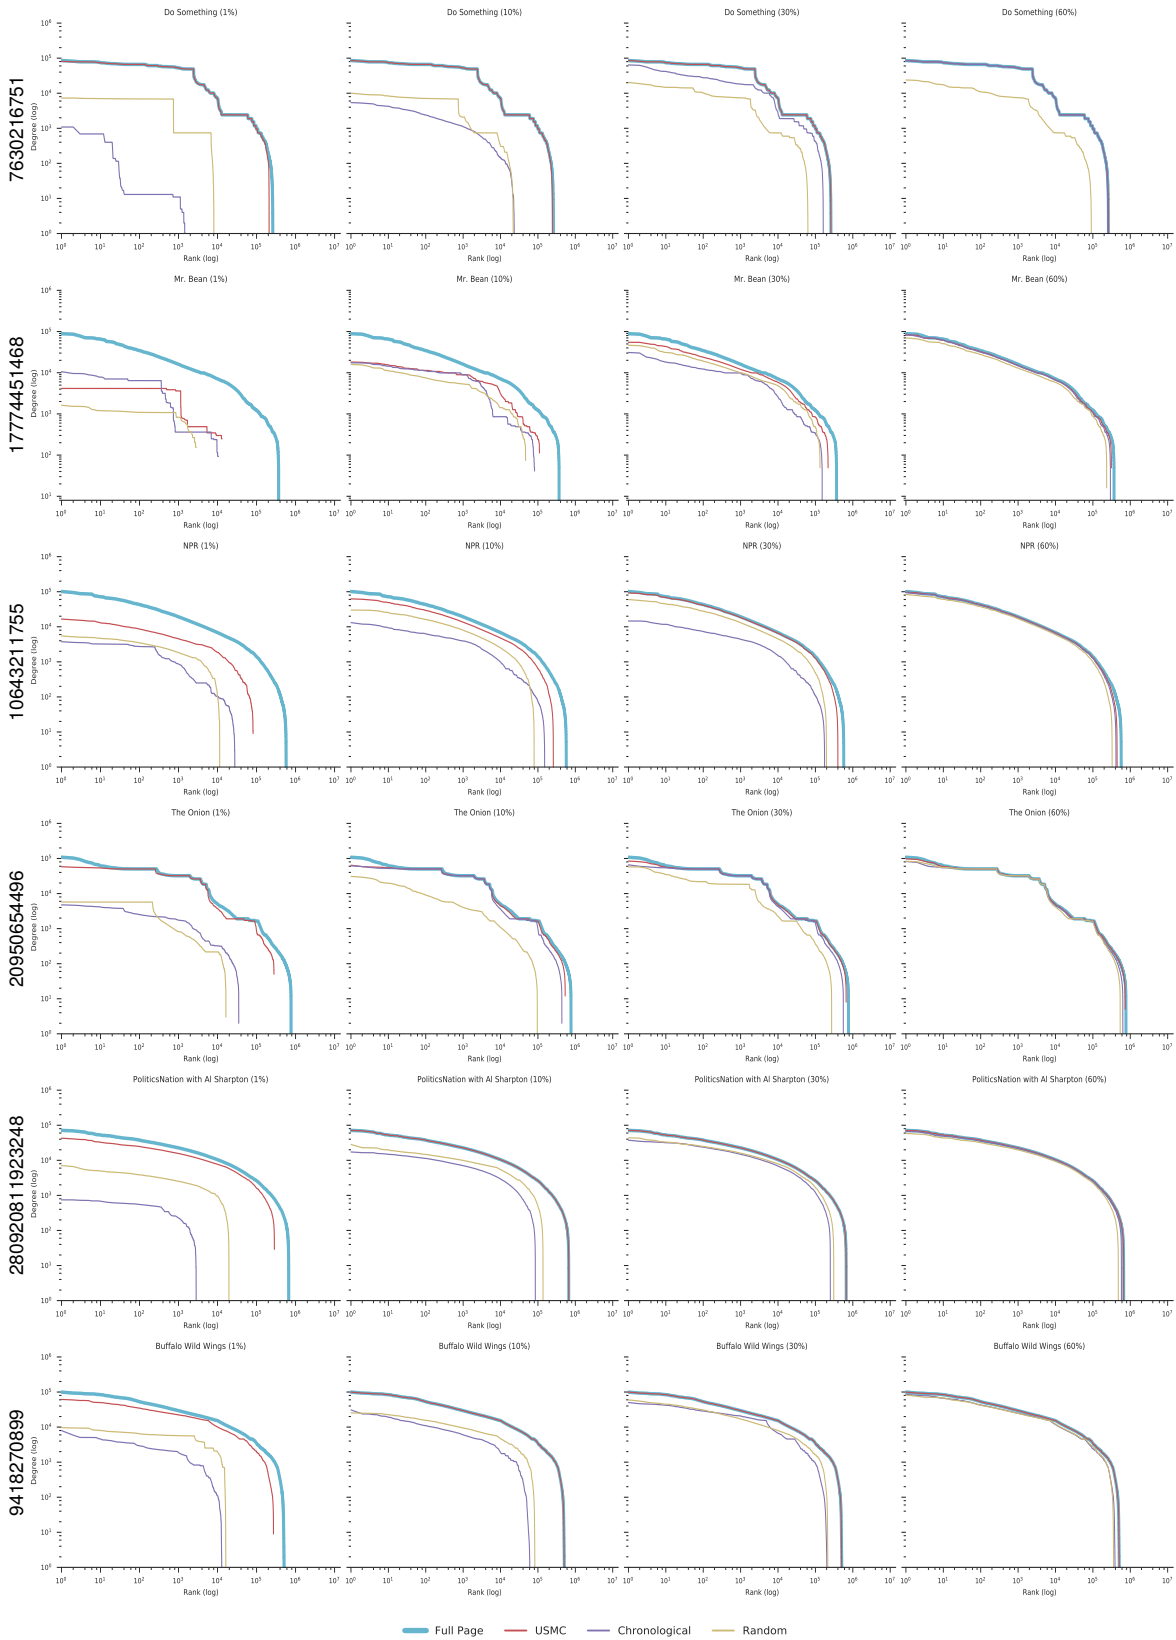

Continued on next page

**S2 Fig.** Degree distribution for the analysed Facebook pages. Each column represents a sample size (1%, 10%, 30%, and 60%), and each row represents a page.

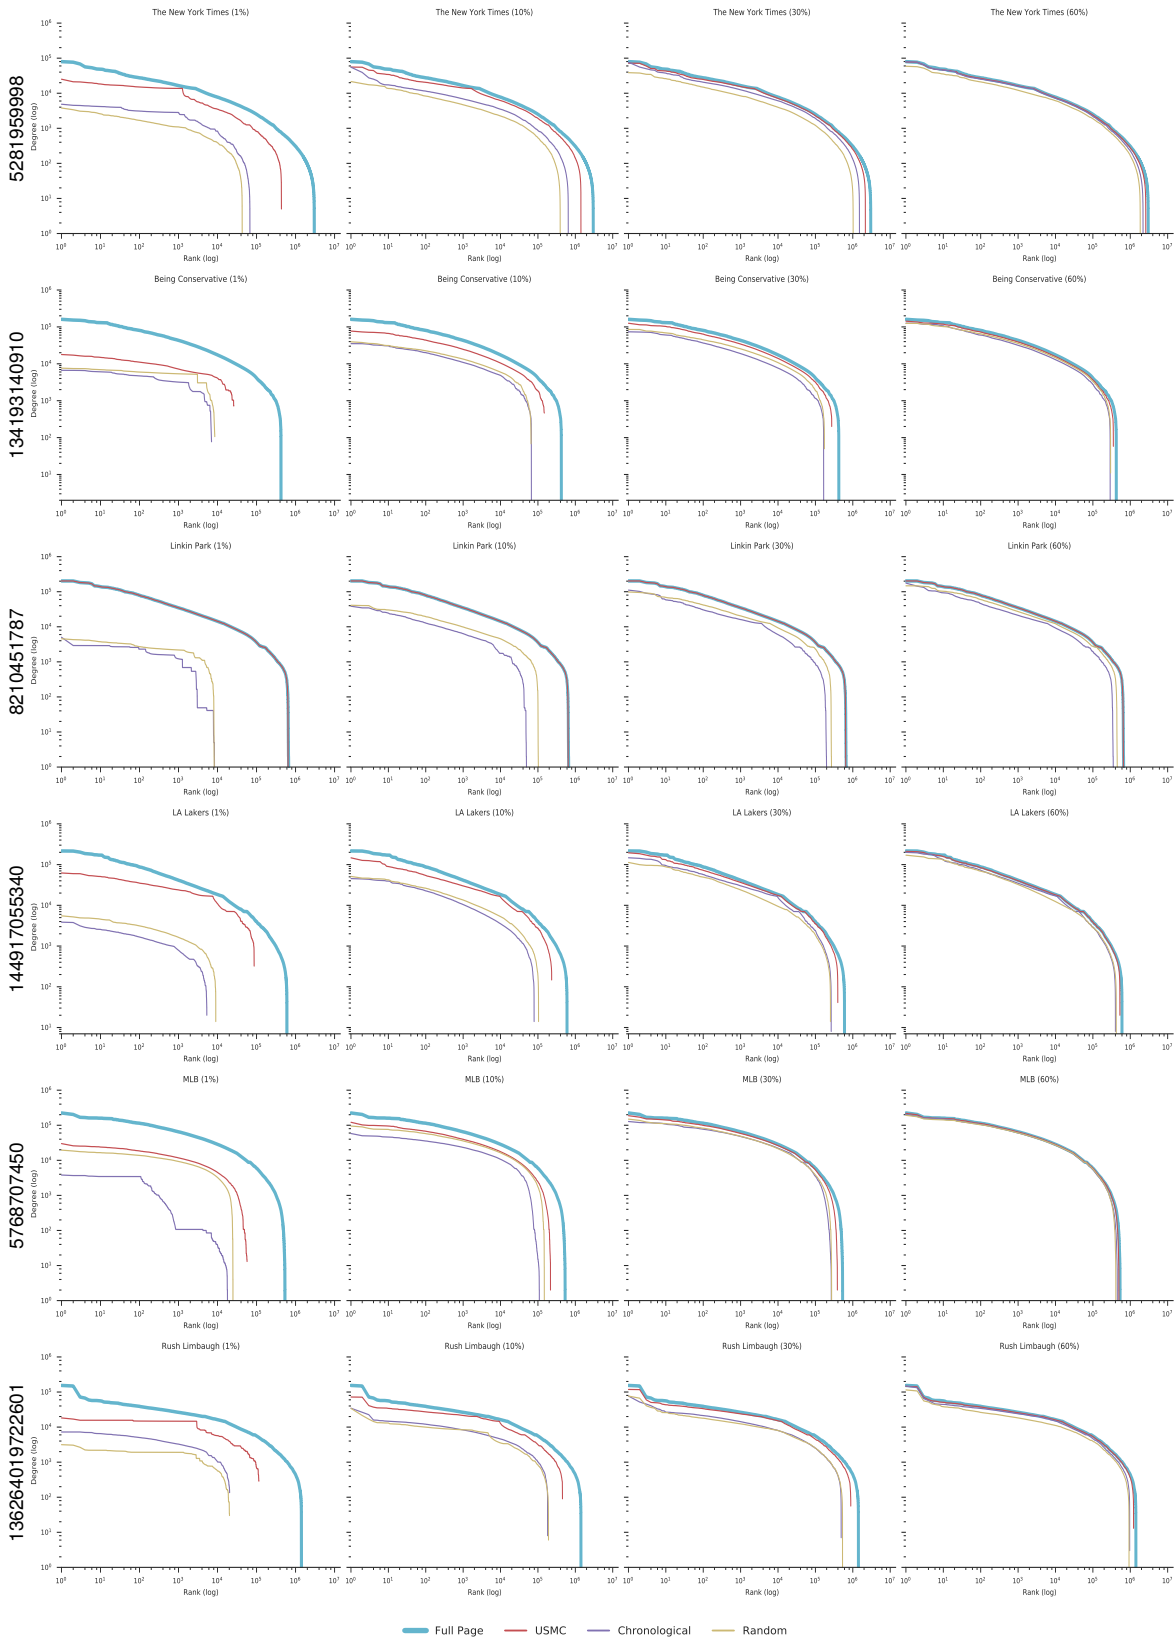

Continued on next page

**S2 Fig.** Degree distribution for the analysed Facebook pages. Each column represents a sample size (1%, 10%, 30%, and 60%), and each row represents a page.

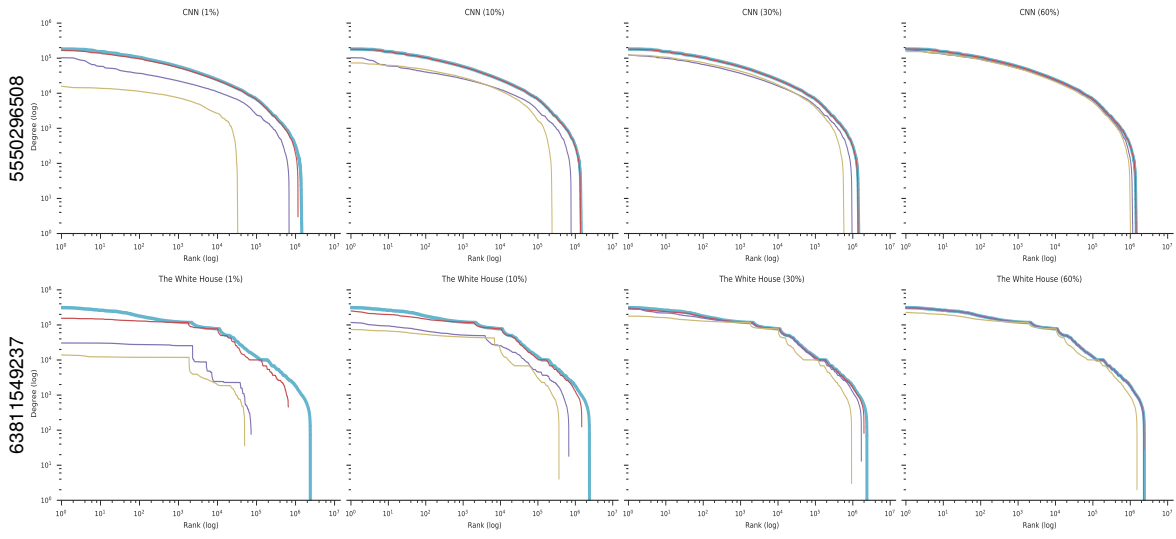

5550296508

63811549237

133279166727577

SKIPPED

6815841748

SKIPPED

— Full Page — USMC — Chronological — Random

**S2 Fig.** Degree distribution for the analysed Facebook pages. Each column represents a sample size (1%, 10%, 30%, and 60%), and each row represents a page.
